# Supplementary material for: History of the Biodiversity of Ladybirds (Coccinellidae) at the Black Sea Coast of the Russian Caucasus in the Last 120 Years—Does the Landscape Transformation and Establishment of Harmonia axyridis Have an Impact?
Source: Insects. 2020 Nov 23;11(11):824. doi: 10.3390/insects11110824 (PMC7700593; doi:10.3390/insects11110824)
Supplement: Supplementary file 1 [file insects-11-00824-s001.xlsx]

## Sheet: материал
Table S1: Records of ladybird species at the Black Sea coast of the Russian Caucasus
Title of the article: History of biodiversity of the ladybirds (Coccinellidae) at the Black Sea Coast of the Russian Caucasus in the last 120 years: do the landscape transformation and establishment of Harmonia axyridis have an impact?
Authors: Andrzej O. Bieńkowski and Marina J. Orlova-Bienkowskaja
Species	District	Locality	Latitude	Longitude	Year	Source of information: museum, private collector or literature source
Adalia bipunctata (Linnaeus, 1758)	Sochi	Khosta, Chernomorskaya Province, 19.6.1904, A. Silant'ev	43.5141	39.8644	1904	Zoological Institute, Russian Academy of Sciences
Adalia bipunctata (Linnaeus, 1758)	Novorossijsk	Novorossijsk, Anapskoe Roadway, 1911	44.7343	37.7459	1911	[Bogdanov-Katjkov, 1916]
Adalia bipunctata (Linnaeus, 1758)	Novorossijsk	Novorossijsk 7.1912	44.7239	37.769	1912	[Bogdanov-Katjkov, 1916]
Adalia bipunctata (Linnaeus, 1758)	Gelendzhik	Gelendzhik, Chernomorskaya Province, N. Vorob'ev	44.5611	38.0768	1912	Zoological Institute, Russian Academy of Sciences
Adalia bipunctata (Linnaeus, 1758)	Sochi	Lower reaches Khosta River, 25.6.1930, A. Martynov	43.5114	39.8697	1930	Zoological Institute, Russian Academy of Sciences
Adalia bipunctata (Linnaeus, 1758)	Sochi	Sochi, 12.6.1957, Garnovskaya	43.5855	39.7231	1957	Zoological Institute, Russian Academy of Sciences
Adalia bipunctata (Linnaeus, 1758)	Sochi	Sochi, 1985, V.L. Filippov	43.5855	39.7231	1985	V.L. Filippov
Adalia bipunctata (Linnaeus, 1758)	Sochi	Sovkhoz "Russia", Adler	43.3907	39.9848	1986	A.G. Koval
Adalia bipunctata (Linnaeus, 1758)	Sochi	Sochi, 1986, V.L. Filippov	43.5855	39.7231	1986	V.L. Filippov
Adalia bipunctata (Linnaeus, 1758)	Anapa	Anapa, Dzhemete, 3.8.1987, A.I. Prikhod’ko	44.9513	37.3237	1987	A.I. Prikhod’ko
Adalia bipunctata (Linnaeus, 1758)	Sochi	Sochi, 13.06.2008 A.V. Korovin	43.5855	39.7231	2008	A.S. Sazhnev
Adalia bipunctata (Linnaeus, 1758)	Sochi	Sochi, 1.6.2008	43.5855	39.7231	2008	A.O. Bieńkowski1 and M.J. Orlova-Bienkowskaja
Adalia bipunctata (Linnaeus, 1758)	Sochi	Sochi, 31.5.2008	43.5855	39.7231	2008	A.O. Bieńkowski1 and M.J. Orlova-Bienkowskaja
Adalia bipunctata (Linnaeus, 1758)	Sochi	Sochi, 31.5.2008	43.5855	39.7231	2008	A.O. Bieńkowski1 and M.J. Orlova-Bienkowskaja
Adalia bipunctata (Linnaeus, 1758)	Sochi	Sochi	43.5855	39.7231	2011	[Mokhrin. 2012]
Adalia bipunctata (Linnaeus, 1758)	Tuapsinskiy district	Tuapse, sweep netting on lawns, 7.5.2013	44.0956	39.0736	2013	A.O. Bieńkowski1 and M.J. Orlova-Bienkowskaja
Adalia bipunctata (Linnaeus, 1758)	Sochi	Sochi, Arboretum, 10.5.2013	43.5719	39.7427	2013	A.O. Bieńkowski1 and M.J. Orlova-Bienkowskaja
Adalia bipunctata (Linnaeus, 1758)	Sochi	Sochi, Bytkha, 8.5.2013	43.5654	39.7613	2013	A.O. Bieńkowski1 and M.J. Orlova-Bienkowskaja
Adalia bipunctata (Linnaeus, 1758)	Sochi	Adler, floodplain of Mzymta River, 11.5.2013	43.4184	39.9243	2013	A.O. Bieńkowski1 and M.J. Orlova-Bienkowskaja
Adalia bipunctata (Linnaeus, 1758)	Sochi	Rosa Khutor, floodplain of Mzymta River, on the bushes, 3.5.2013	43.6717	40.2963	2013	A.O. Bieńkowski1 and M.J. Orlova-Bienkowskaja
Adalia bipunctata (Linnaeus, 1758)	Anapa	Vicinity of Malyj Utrish, biological station, 9.5.2016	44.7094	37.4572	2016	A.O. Bieńkowski1 and M.J. Orlova-Bienkowskaja
Adalia bipunctata (Linnaeus, 1758)	Gelendzhik	Gelendzhik, Cape Tolsty, sweep netting, wasteland, 10.5.2016	44.5511	38.063	2016	A.O. Bieńkowski1 and M.J. Orlova-Bienkowskaja
Adalia bipunctata (Linnaeus, 1758)	Gelendzhik	Gelendzhik, 11.5.2016	44.5611	38.0768	2016	A.O. Bieńkowski1 and M.J. Orlova-Bienkowskaja
Adalia bipunctata (Linnaeus, 1758)	Gelendzhik	Gelendzhik, in the street, 12.5.2016	44.5611	38.0768	2016	A.O. Bieńkowski1 and M.J. Orlova-Bienkowskaja
Adalia bipunctata (Linnaeus, 1758)	Sochi	Sochi, 17.5.2016	43.5855	39.7231	2016	A.O. Bieńkowski1 and M.J. Orlova-Bienkowskaja
Adalia bipunctata (Linnaeus, 1758)	Gelendzhik	Gelendzhik, vicinity of Marjina Roshcha, vineyard	44.6191	38.0293	2017	A.S. Bondarenko
Adalia bipunctata (Linnaeus, 1758)	Sochi	Vicinity of Nol' pass, tea plantation	43.7863	39.6546	2017	A.S. Bondarenko
Adalia bipunctata (Linnaeus, 1758)	Sochi	Vicinity of Solokh-Aul, tea plantation	43.7989	39.6766	2017	A.S. Bondarenko
Adalia bipunctata (Linnaeus, 1758)	Sochi	Sochi,Fabritsiusa Street, wasteland, sweep netting, 7.6.2017	43.5795	39.7492	2017	A.O. Bieńkowski1 and M.J. Orlova-Bienkowskaja
Adalia bipunctata (Linnaeus, 1758)	Sochi	Razdolnoe, floodplain of Bzugu River, wasteland, sweep netting, 6.6.2017	43.5834	39.7716	2017	A.O. Bieńkowski1 and M.J. Orlova-Bienkowskaja
Adalia bipunctata (Linnaeus, 1758)	Sochi	Sochi, on bushes, 30.4.2018	43.5855	39.7231	2018	A.O. Bieńkowski1 and M.J. Orlova-Bienkowskaja
Adalia bipunctata (Linnaeus, 1758)	Sochi	Sochi, on bushes, 8.5.2018	43.5855	39.7231	2018	A.O. Bieńkowski1 and M.J. Orlova-Bienkowskaja
Adalia bipunctata (Linnaeus, 1758)	Sochi	Sochi, on laurel cherry, 14.5.2018	43.5855	39.7231	2018	A.O. Bieńkowski1 and M.J. Orlova-Bienkowskaja
Adalia bipunctata (Linnaeus, 1758)	Sochi	Sochi, shaking of bushes in the evening, 10.5.2018	43.5855	39.7231	2018	A.O. Bieńkowski1 and M.J. Orlova-Bienkowskaja
Adalia bipunctata (Linnaeus, 1758)	Sochi	Sochi, shaking of bushes in the evening, 3.5.2018	43.5855	39.7231	2018	A.O. Bieńkowski1 and M.J. Orlova-Bienkowskaja
Adalia bipunctata (Linnaeus, 1758)	Sochi	Sochi, shaking of bushes in the evening, 9.5.2018	43.5855	39.7231	2018	A.O. Bieńkowski1 and M.J. Orlova-Bienkowskaja
Adalia bipunctata (Linnaeus, 1758)	Sochi	Sochi, shaking of bushes, 24.4.2018	43.5855	39.7231	2018	A.O. Bieńkowski1 and M.J. Orlova-Bienkowskaja
Adalia bipunctata (Linnaeus, 1758)	Sochi	Sochi, Plastunskaya Street, wasteland, sweep netting, 10.5.2018	43.6188	39.7415	2018	A.O. Bieńkowski1 and M.J. Orlova-Bienkowskaja
Adalia decempunctata (Linnaeus, 1758)	Sochi	Sochi, 12.6.1957, Granovskaya	43.5855	39.7231	1957	Zoological Institute, Russian Academy of Sciences
Adalia decempunctata (Linnaeus, 1758)	Sochi	Sochi, Griboedova Street, 12.6.1984, O.B. Bienkowski	43.5772	39.7363	1984	O.B. Bieńkowski
Adalia decempunctata (Linnaeus, 1758)	Tuapsinskiy district	10 km north-west to Dzhubga, Inal Bay, 23.5.1985, B.A. Korotyaev	44.3304	38.6256	1985	Zoological Institute, Russian Academy of Sciences
Adalia decempunctata (Linnaeus, 1758)	Anapa	Vicinity of Malyj Utrish, Shirokaya Shchel, 12.5.1995	44.7227	37.4525	1995	A.O. Bieńkowski1 and M.J. Orlova-Bienkowskaja
Adalia decempunctata (Linnaeus, 1758)	Novorossijsk	Between Novorossijsk and Abrau, South Ozereevka, 21.6.2001, K. Tomkovitch	44.6738	37.632	2001	All-Russian center for plant quarantine
Adalia decempunctata (Linnaeus, 1758)	Gelendzhik	Vicinity of Divnomorskoe, 7.5.2002, M.I. Shapovalov	44.4998	38.1373	2002	All-Russian center for plant quarantine
Adalia decempunctata (Linnaeus, 1758)	Gelendzhik	Divnomorskoe, 7.05.2002, M.I. Shapovalov	44.4998	38.1373	2002	M.I. Shapovalov
Adalia decempunctata (Linnaeus, 1758)	Sochi	Sochi, 13.06.2008 A.V. Korovin	43.5855	39.7231	2008	A.S. Sazhnev
Adalia decempunctata (Linnaeus, 1758)	Sochi	Sochi, the hill near Fabritsiusa Street, sweep netting of grasses, 1.6.2008	43.5795	39.7492	2008	A.O. Bieńkowski1 and M.J. Orlova-Bienkowskaja
Adalia decempunctata (Linnaeus, 1758)	Sochi	Abazinka, 6.5.2013	43.6089	39.8256	2013	A.O. Bieńkowski1 and M.J. Orlova-Bienkowskaja
Adalia decempunctata (Linnaeus, 1758)	Sochi	Adler, Olympic Park, 15.2.2014	43.4062	39.9546	2014	A.O. Bieńkowski1 and M.J. Orlova-Bienkowskaja
Adalia decempunctata (Linnaeus, 1758)	Gelendzhik	Gelendzhik, 10.5.2016 and 11.5.2016	44.5611	38.0768	2016	A.O. Bieńkowski1 and M.J. Orlova-Bienkowskaja
Adalia decempunctata (Linnaeus, 1758)	Gelendzhik	Gelendzhik, in the street, 12.5.2016	44.5611	38.0768	2016	A.O. Bieńkowski1 and M.J. Orlova-Bienkowskaja
Adalia decempunctata (Linnaeus, 1758)	Gelendzhik	Gelendzhik, vicinity of Marjina Roshcha, vineyard	44.6191	38.0293	2017	A.S. Bondarenko
Adalia decempunctata (Linnaeus, 1758)	Sochi	Adler, Imeretinskaya lowland, bank of the pond, sweep netting, 11.6.2017	43.41	39.9787	2017	A.O. Bieńkowski1 and M.J. Orlova-Bienkowskaja
Anisosticta novemdecimpunctata (Linnaeus, 1758)	Gelendzhik	Vicinity of Divnomorskoe, 7.05.2002, M.I. Shapovalov leg.	44.4998	38.1373	2002	All-Russian center for plant quarantine + M.I. Shapovalov
Anisosticta novemdecimpunctata (Linnaeus, 1758)	Anapa	Vicinity of Malyj Utrish, sea shore, weed vegetation, sweep netting, 5.5.2016	44.7094	37.4572	2016	A.O. Bieńkowski1 and M.J. Orlova-Bienkowskaja
Anisosticta novemdecimpunctata (Linnaeus, 1758)	Sochi	Adler, Imeretinskaya lowland, lawn, sweep netting, 19.5.2016	43.41	39.9787	2016	A.O. Bieńkowski1 and M.J. Orlova-Bienkowskaja
Anisosticta novemdecimpunctata (Linnaeus, 1758)	Sochi	Adler, Imeretinskaya lowland, wasteland along the chanel, sweep netting, 19.5.2016	43.41	39.9787	2016	A.O. Bieńkowski1 and M.J. Orlova-Bienkowskaja
Anisosticta novemdecimpunctata (Linnaeus, 1758)	Sochi	Adler, waste land near Imeretinskij Resort railway station, 4.5.2018	43.4119	39.9743	2018	A.O. Bieńkowski1 and M.J. Orlova-Bienkowskaja
Aphidecta obliterata (Linnaeus, 1758)	Sochi	Krasnaya Polyana, 1600 m a.s.l., 12.6.1984, A. Konstantinov	43.68	40.2055	1984	Zoological Institute, Russian Academy of Sciences
Aphidecta obliterata (Linnaeus, 1758)	Sochi	Sochi reg., Psekhako, 2000 m, N43*41'28 E40*22', 14-18.6.2008, K. Tomkovitch	43.6964	40.3196	2008	All-Russian center for plant quarantine
Aphidecta obliterata (Linnaeus, 1758)	Sochi	Latitude: 43.691111, Longitude:40.366667 17 June 2008	43.6911	40.3667	2008	https://www.inaturalist.org/observations/48145470
Bulaea lichatschovii (Hummel, 1827)	Anapa	Anapa, 7.1910	44.895	37.3162	1910	[Bogdanov-Katjkov, 1916]
Bulaea lichatschovii (Hummel, 1827)	Novorossijsk	Novorossijsk, Anapskoe Roadway, 7.1913	44.7343	37.7459	1913	[Bogdanov-Katjkov, 1916]
Bulaea lichatschovii (Hummel, 1827)	Gelendzhik	Markotkh 8.7.1913	44.5989	38.0694	1913	[Bogdanov-Katjkov, 1916]
Bulaea lichatschovii (Hummel, 1827)	Novorossijsk	Novorossijsk 1916	44.7239	37.769	1916	[Bogdanov-Katjkov, 1916]
Bulaea lichatschovii (Hummel, 1827)	Anapa	Anapa, grasses near the sea shore, 18.8.1990	44.895	37.3162	1990	A.O. Bieńkowski1 and M.J. Orlova-Bienkowskaja
Bulaea lichatschovii (Hummel, 1827)	Anapa	Anapa, grasses near the sea shore, sweep netting, 12.8.1990 and 17.8.1990	44.895	37.3162	1990	A.O. Bieńkowski1 and M.J. Orlova-Bienkowskaja
Calvia decemguttata (Linnaeus, 1767)	Sochi	Sochi, 1987, V.L. Filippov	43.5855	39.7231	1987	V.L. Filippov
Calvia decemguttata (Linnaeus, 1767)	Sochi	60 east to Sochi, Caucasian Nature Reserve, Pslukh, pitfall trap, 13.8.2001, M.N. Tsurikov	43.6615	40.3964	2001	Zoological Institute, Russian Academy of Sciences
Calvia decemguttata (Linnaeus, 1767)	Sochi	60 east to Sochi, Caucasian Nature Reserve, Pslukh, on the ground 12.8.2005, M.N. Tsurikov	43.6615	40.3964	2005	M.N. Tsurikov
Calvia decemguttata (Linnaeus, 1767)	Sochi	Sochi, 13.06.2008 A.V. Korovin	43.5855	39.7231	2008	A.S. Sazhnev
Calvia decemguttata (Linnaeus, 1767)	Sochi	Sochi	43.5855	39.7231	2011	[Mokhrin. 2012]
Calvia decemguttata (Linnaeus, 1767)	Sochi	Sochi, floodplain of Zmejka River, sweep netting, 23.4.2018	43.6558	39.8125	2018	A.O. Bieńkowski1 and M.J. Orlova-Bienkowskaja
Calvia decemguttata (Linnaeus, 1767)	Anapa	Malyj Utrish. 25.05-4.06 2019	44.7094	37.4572	2019	O.A. Belyaev
Calvia decemguttata (Linnaeus, 1767)	Sochi	Chernomorskaya Province			~1900	[Jacobson, 1915]
Calvia quatuordecimguttata (Linnaeus, 1758)	Sochi	Caucasus occ., Krasnaja Polyana, 19.6.1907	43.68	40.2055	1907	Zoological Institute, Russian Academy of Sciences
Calvia quatuordecimguttata (Linnaeus, 1758)	Sochi	Sochi, 28.7.1927, I. Gudim	43.5855	39.7231	1927	Zoological Institute, Russian Academy of Sciences
Calvia quatuordecimguttata (Linnaeus, 1758)	Sochi	N to Lazarevskaya, Kirova Aul, 29.9.1985, A.G. Kirejchuk	43.9696	39.4464	1985	Zoological Institute, Russian Academy of Sciences
Calvia quatuordecimguttata (Linnaeus, 1758)	Sochi	Sochi, 13.06.2008 A.V. Korovin	43.5855	39.7231	2008	A.S. Sazhnev
Calvia quatuordecimguttata (Linnaeus, 1758)	Sochi	Sochi reg., 2000 m, Psekhako Mt., N 43*41'28 E40*22' 14-18.6.2008, K. Tomkovitch	43.6964	40.3196	2008	All-Russian center for plant quarantine
Calvia quatuordecimguttata (Linnaeus, 1758)	Sochi	Sochi, 43.691 N, 40.366 E, 15.06.2008	43.691	40.366	2008	https://www.inaturalist.org/observations/48164766
Calvia quatuordecimguttata (Linnaeus, 1758)	Sochi	Semenovka, 4.5.2013	43.6419	39.8502	2013	A.O. Bieńkowski1 and M.J. Orlova-Bienkowskaja
Calvia quatuordecimguttata (Linnaeus, 1758)	Sochi	Rosa Khutor, floodplain of Mzymta River, on bushes, 3.5.2013	43.6717	40.2963	2013	A.O. Bieńkowski1 and M.J. Orlova-Bienkowskaja
Calvia quatuordecimguttata (Linnaeus, 1758)	Sochi	Loo, oak forest, under the bark of the beerch log, 15.2.2014	43.7047	39.5841	2014	A.O. Bieńkowski1 and M.J. Orlova-Bienkowskaja
Calvia quatuordecimguttata (Linnaeus, 1758)	Sochi	Sochi, Arboretum, 21.5.2016	43.5718	39.7428	2016	A.O. Bieńkowski1 and M.J. Orlova-Bienkowskaja
Calvia quindecimguttata (Fabricius, 1777)	Sochi	Khosta, Chernomorskaya Province, 19.8.1901, A. Silant'ev	43.5128	39.8737	1901	Zoological Institute, Russian Academy of Sciences
Calvia quindecimguttata (Fabricius, 1777)	Sochi	Sochi, 1985, V.L. Filippov	43.5855	39.7231	1985	V.L. Filippov
Calvia quindecimguttata (Fabricius, 1777)	Sochi	Razdolnoe, in the air, 30.5.2008	43.5834	39.7716	2008	A.O. Bieńkowski1 and M.J. Orlova-Bienkowskaja
Ceratomegilla notata (Laicharting, 1781)	Novorossijsk	Novorossijsk, Anapskoe Roadway, 7.1910	44.7343	37.7459	1910	[Bogdanov-Katjkov, 1916]
Ceratomegilla undecimnotata (Schneider, 1792)	Gelendzhik	Gelendzhik, 1913, N.I. Vorobiev	44.5611	38.0768	1913	Zoological Institute, Russian Academy of Sciences
Ceratomegilla undecimnotata (Schneider, 1792)	Novorossijsk	Vicinity of Novorossijsk, 30.4.1917, P. Zhikharev	44.7239	37.769	1917	Zoological Institute, Russian Academy of Sciences
Ceratomegilla undecimnotata (Schneider, 1792)	Anapa	Vicinity of Malyj Utrish, on Asteraceae, 21.5.1995	44.7094	37.4572	1995	A.O. Bieńkowski1 and M.J. Orlova-Bienkowskaja
Chilocorus bipustulatus (Linnaeus, 1758)	Sochi	Sochi, 13.9.1948, Rubtsov	43.5855	39.7231	1948	Zoological Institute, Russian Academy of Sciences
Chilocorus bipustulatus (Linnaeus, 1758)	Anapa	Anapa, Varvarovka, 8.5.70	44.8263	37.3675	1970	collection of S.M. Yablokov-Hnzoryan in Scientific Center of Zoology and Hydroecology, National Academy of Sciences of Armenia, Erevan, Armenia
Chilocorus bipustulatus (Linnaeus, 1758)	Anapa	Anapa, Dzhemete, on Salix, 11.8.1990	44.9513	37.3237	1990	A.O. Bieńkowski1 and M.J. Orlova-Bienkowskaja
Chilocorus bipustulatus (Linnaeus, 1758)	Anapa	Vicinity of Malyj Utrish, biological station, 26.5-5.6.2014 A.S. Prosvirov	44.7057	37.4698	2014	A.S. Prosvirov
Chilocorus bipustulatus (Linnaeus, 1758)	Anapa	Vicinity of Malyj Utrish, Shirokaya, sweep netting in the roadside, 7.5.2016	44.7227	37.4525	2016	A.O. Bieńkowski1 and M.J. Orlova-Bienkowskaja
Chilocorus bipustulatus (Linnaeus, 1758)	Sochi	Sochi, war memorial, on thuja, 13.6.2017	43.5885	39.731	2017	A.O. Bieńkowski1 and M.J. Orlova-Bienkowskaja
Chilocorus bipustulatus (Linnaeus, 1758)	Sochi	Golovinka, sea shore, 12.5.2018	43.7938	39.4688	2018	A.O. Bieńkowski1 and M.J. Orlova-Bienkowskaja
Chilocorus bipustulatus (Linnaeus, 1758)	Sochi	Sochi, shaking of bushes in the evening, 21.4.2018	43.5855	39.7231	2018	A.O. Bieńkowski1 and M.J. Orlova-Bienkowskaja
Chilocorus bipustulatus (Linnaeus, 1758)	Sochi	Adler, shaking of bushes at night near the railway station "Airport" 22-23.9.2020	43.4495	39.9409	2020	A.O. Bieńkowski1 and M.J. Orlova-Bienkowskaja
Chilocorus bipustulatus (Linnaeus, 1758)	Sochi	Adler, near the airport and the railway station "Airport", shaking of bushes at night, 17-18.9.2020	43.4495	39.9409	2020	A.O. Bieńkowski1 and M.J. Orlova-Bienkowskaja
Chilocorus bipustulatus (Linnaeus, 1758)	Sochi	Chernomorskaya Province			~1900	[Jacobson, 1915]
Chilocorus renipustulatus (Scriba, 1790)	Sochi	Sochi, 1911	43.5855	39.7231	1911	Zoological Museum of Moscow State University
Chilocorus renipustulatus (Scriba, 1790)	Gelendzhik	Mikhajlovskij Pass., 15.6.1926, B.V. Dobrovolskij	44.5142	38.3169	1926	Zoological Institute, Russian Academy of Sciences
Chilocorus renipustulatus (Scriba, 1790)	Sochi	Sochi, 06-1926	43.5855	39.7231	1926	Zoological Museum of Moscow State University
Chilocorus renipustulatus (Scriba, 1790)	Sochi	Sochi, 2.8.1927, I. Gudim	43.5855	39.7231	1927	Zoological Institute, Russian Academy of Sciences
Chilocorus renipustulatus (Scriba, 1790)	Sochi	Sochi, Soveta Ministrov garden, on tingerin tree, 8.10.1947, Rubtsov	43.5855	39.7231	1947	Zoological Institute, Russian Academy of Sciences
Chilocorus renipustulatus (Scriba, 1790)	Sochi	3 km south of Lazarevskoe, experimental plantation of the All-Russian Institute of Plant Protection, on the euonimus, 15.7.1952, V. Rudolf	43.8683	39.3836	1952	Zoological Institute, Russian Academy of Sciences
Chilocorus renipustulatus (Scriba, 1790)	Sochi	Sovkhoz "Russia", Adler	43.3907	39.9848	1988	A.G. Koval
Chilocorus renipustulatus (Scriba, 1790)	Sochi	Vicinity of Sochi, Dagomys, foothill, on the pear tree, 25.8.1992, A.O. Bienkowski	43.6578	39.6551	1992	Andrzej O. Bieńkowski
Chilocorus renipustulatus (Scriba, 1790)	Sochi	Vicinity of Loo, 17-26.09.2001 Smirnov	43.7047	39.5841	2001	M.E. Smirnov
Chilocorus renipustulatus (Scriba, 1790)	Gelendzhik	North-east part of Gelendzhik, wasteland, 15.09.2006	44.5503	38.1299	2006	personal communication by R.N. Ishin
Chilocorus renipustulatus (Scriba, 1790)	Sochi	12 km south-est to Sochi, slope of the De Simona Redge, 28.3.2008, M.N. Tsurikov	43.573	39.8129	2008	Zoological Institute, Russian Academy of Sciences
Chilocorus renipustulatus (Scriba, 1790)	Sochi	Sochi, the 20th Mountain Rifle Division Street, 30.4.2013	43.5714	39.7573	2013	A.O. Bieńkowski1 and M.J. Orlova-Bienkowskaja
Chilocorus renipustulatus (Scriba, 1790)	Sochi	Sochi, Semenovka, 4.5.2013	43.6419	39.8502	2013	A.O. Bieńkowski1 and M.J. Orlova-Bienkowskaja
Chilocorus renipustulatus (Scriba, 1790)	Sochi	Adler, Psou, 2.5.2013	43.3998	40.0083	2013	A.O. Bieńkowski1 and M.J. Orlova-Bienkowskaja
Chilocorus renipustulatus (Scriba, 1790)	Sochi	Vicinity of Sochi, 30 km NNO Adler, Chvizhepse, 250-800 m a.s.l., 29.4-6.5.2013, S. Kurbatov leg.	43.6311	40.0863	2013	All-Russian center for plant quarantine
Chilocorus renipustulatus (Scriba, 1790)	Sochi	Vicinity of Sochi, 30 km NNO Adler, low reaches of Chvizhipse River, 220-550 a.s.l., 29.4-6.5.2013, S. Kurbatov leg.	43.6311	40.0863	2013	All-Russian center for plant quarantine
Chilocorus renipustulatus (Scriba, 1790)	Sochi	Sochi, shaking of bushes in the evening, 13.6.2017	43.5855	39.7231	2017	A.O. Bieńkowski1 and M.J. Orlova-Bienkowskaja
Chilocorus renipustulatus (Scriba, 1790)	Sochi	Sochi, 20th Mountain Rifle Division Street, forest edge, sweep netting, 2.6.2017	43.5714	39.7573	2017	A.O. Bieńkowski1 and M.J. Orlova-Bienkowskaja
Chilocorus renipustulatus (Scriba, 1790)	Sochi	Sochi, the 20th Mountain Rifle Division Street, forest edge, sweep netting, 2.6.2017	43.5714	39.7573	2017	A.O. Bieńkowski1 and M.J. Orlova-Bienkowskaja
Chilocorus renipustulatus (Scriba, 1790)	Sochi	Sochi, 05-2018	43.5855	39.7231	2018	A.O. Bieńkowski1 and M.J. Orlova-Bienkowskaja
Chilocorus renipustulatus (Scriba, 1790)	Sochi	Sochi, 9.5.2018,	43.5855	39.7231	2018	A.O. Bieńkowski1 and M.J. Orlova-Bienkowskaja
Chilocorus renipustulatus (Scriba, 1790)	Sochi	Sochi, shaking of bushes in the evening, 11.5.2018	43.5855	39.7231	2018	A.O. Bieńkowski1 and M.J. Orlova-Bienkowskaja
Chilocorus renipustulatus (Scriba, 1790)	Sochi	Adler, Olympic Park, on thuja, 6.5.2018	43.4062	39.9546	2018	A.O. Bieńkowski1 and M.J. Orlova-Bienkowskaja
Chilocorus renipustulatus (Scriba, 1790)	Sochi	Adler, Moldovka, shaking of bushes in the street, 17.9.2020	43.4551	39.9499	2020	A.O. Bieńkowski1 and M.J. Orlova-Bienkowskaja
Chilocorus renipustulatus (Scriba, 1790)	Sochi	Adler, Moldovka, at the airport fence, barierr trap on the bush, 24-27.9.2020	43.4531	39.9559	2020	A.O. Bieńkowski1 and M.J. Orlova-Bienkowskaja
Chilocorus renipustulatus (Scriba, 1790)	Sochi	Adler, wasteland near the reilway station "Olimpic Park", 25.9.2020	43.4132	39.9695	2020	A.O. Bieńkowski1 and M.J. Orlova-Bienkowskaja
Clitostethus arcuatus (Rossi, 1794)	Sochi	Sochi, shaking of bushes in the evening, 13.6.2017	43.5855	39.7231	2017	A.O. Bieńkowski1 and M.J. Orlova-Bienkowskaja
Coccidula scutellata (Herbst, 1783)	Anapa	Anapa, meadow on a cliff by the sea, sweep netting, 12.8.1990	44.895	37.3162	1990	A.O. Bieńkowski1 and M.J. Orlova-Bienkowskaja
Coccinella hieroglyphica Linnaeus, 1758	Novorossijsk	Novorossijsk, Anapskoe Roadway, 6.1911	44.7343	37.7459	1911	[Bogdanov-Katjkov, 1916]
Coccinella magnifica Redtenbacher, 1843	Sochi	Caucasus occ., Krasnaja Polana, 28.5.1907, Kiritschenko	43.68	40.2055	1907	Zoological Institute, Russian Academy of Sciences
Coccinella magnifica Redtenbacher, 1843	Novorossijsk	Vicinity of Novorossijsk, floodplain of Dyurso River, sweep netting, 8.5.2016	44.6847	37.564	2016	A.O. Bieńkowski1 and M.J. Orlova-Bienkowskaja
Coccinella quinquepunctata Linnaeus, 1758	Novorossijsk	Novorossijsk, Anapskoe Roadway, 7.1911	44.7343	37.7459	1911	[Bogdanov-Katjkov, 1916]
Coccinella quinquepunctata Linnaeus, 1758	Gelendzhik	Gelendzhik, Chernomorskaya Province, N. Vorob'ev	44.5611	38.0768	1912	Zoological Institute, Russian Academy of Sciences
Coccinella quinquepunctata Linnaeus, 1758	Sochi	Sochi, 28.7.1927, I. Gudim	43.5855	39.7231	1927	Zoological Institute, Russian Academy of Sciences
Coccinella quinquepunctata Linnaeus, 1758	Sochi	Low reaches of Khosta River, 23.6.1930, A. Martynov	43.5123	39.8696	1930	Zoological Institute, Russian Academy of Sciences
Coccinella quinquepunctata Linnaeus, 1758	Sochi	Near Mzymta River, 10-1975, I.A. Zakharov	43.4234	39.9288	1975	Zoological Institute, Russian Academy of Sciences
Coccinella quinquepunctata Linnaeus, 1758	Sochi	Rosa Khutor, floodplain of Mzymta River, on bushes, 3.5.2013	43.6717	40.2963	2013	A.O. Bieńkowski1 and M.J. Orlova-Bienkowskaja
Coccinella quinquepunctata Linnaeus, 1758	Sochi	Golovinka, Shakhe River floodplain , sweep netting of grasses, 12.5.2018	43.7938	39.4688	2018	A.O. Bieńkowski1 and M.J. Orlova-Bienkowskaja
Coccinella quinquepunctata Linnaeus, 1758	Sochi	Adler, Moldovka, floodplain of Mzymta river, sweep netting and shaking of bushes, 18.9.2020	43.4649	39.9752	2020	A.O. Bieńkowski1 and M.J. Orlova-Bienkowskaja
Coccinella septempunctata Linnaeus, 1758	Novorossijsk	Novorossijsk 6.1912	44.7239	37.769	1912	[Bogdanov-Katjkov, 1916]
Coccinella septempunctata Linnaeus, 1758	Gelendzhik	Gelendzhik, Chernomorskaya Province, N. Vorob'ev	44.5611	38.0768	1912	Zoological Institute, Russian Academy of Sciences
Coccinella septempunctata Linnaeus, 1758	Gelendzhik	Gelendzhik, Chernomorskaya Province, 1912 N. Vorob'ev	44.5611	38.0768	1912	Zoological Institute, Russian Academy of Sciences
Coccinella septempunctata Linnaeus, 1758	Tuapsinskiy district	Marjino, vicinity of Tuapse, Chernomorskaya Province, 1912, Sakhnovskij leg.	44.0946	39.0731	1912	Zoological Institute, Russian Academy of Sciences
Coccinella septempunctata Linnaeus, 1758	Novorossijsk	Novorossijsk, Anapskoe Roadway, 6.1913	44.7343	37.7459	1913	[Bogdanov-Katjkov, 1916]
Coccinella septempunctata Linnaeus, 1758	Novorossijsk	Udelnoe Imenie Abrau, 10.5.1915, K. Demokidov	44.6979	37.5986	1915	Zoological Institute, Russian Academy of Sciences
Coccinella septempunctata Linnaeus, 1758	Novorossijsk	Udelnoe Imenie Abrau, 11.7.1916, E. Miram	44.6979	37.5986	1916	Zoological Institute, Russian Academy of Sciences
Coccinella septempunctata Linnaeus, 1758	Sochi	Sochi, 28.7.1927, I. Gudim	43.5846	39.7235	1927	Zoological Institute, Russian Academy of Sciences
Coccinella septempunctata Linnaeus, 1758	Sochi	Sovkhoz "Russia", Adler district	43.3907	39.9848	1985	A.G. Koval
Coccinella septempunctata Linnaeus, 1758	Sochi	Sochi, 1986, 1987, V.L. Filippov	43.5855	39.7231	1986	V.L. Filippov
Coccinella septempunctata Linnaeus, 1758	Sochi	Sochi, 1986, 1987, V.L. Filippov	43.5855	39.7231	1987	V.L. Filippov
Coccinella septempunctata Linnaeus, 1758	Anapa	Anapa, Dzhemete, sand beach near the sea, thickets of Elaeagnus, 13.8.1990	44.9495	37.3036	1990	A.O. Bieńkowski1 and M.J. Orlova-Bienkowskaja
Coccinella septempunctata Linnaeus, 1758	Anapa	Anapa, Dzhemete, meadow, sweep netting, 10.8.1990	44.9513	37.3237	1990	A.O. Bieńkowski1 and M.J. Orlova-Bienkowskaja
Coccinella septempunctata Linnaeus, 1758	Anapa	Vicinity of Malyj Utrish, Shirokaya, in the meadows, on grasses, 16.5.1995	44.7227	37.4525	1995	A.O. Bieńkowski1 and M.J. Orlova-Bienkowskaja
Coccinella septempunctata Linnaeus, 1758	Anapa	Vicinity of Malyj Utrish, Asteraceae, 21.5.1995	44.7094	37.4572	1995	A.O. Bieńkowski1 and M.J. Orlova-Bienkowskaja
Coccinella septempunctata Linnaeus, 1758	Novorossijsk	Between Malyj Utrish and Dyurso, on Asteraceae, 21.5.1995	44.6925	37.5053	1995	A.O. Bieńkowski1 and M.J. Orlova-Bienkowskaja
Coccinella septempunctata Linnaeus, 1758	Gelendzhik	Vicinity of Gelendzhik, mountains, 12.09.2006	44.5611	38.0768	2006	personal communication by R.N. Ishin
Coccinella septempunctata Linnaeus, 1758	Novorossijsk	Novorossijsk 28.09.2009	44.7239	37.769	2009	http://macroclub.ru/macroid/show_image.php?imageid=37478
Coccinella septempunctata Linnaeus, 1758	Gelendzhik	Gelendzhik 24.06.2009	44.5611	38.0768	2009	http://macroclub.ru/macroid/show_image.php?imageid=39521
Coccinella septempunctata Linnaeus, 1758	Sochi	Sochi	43.5855	39.7231	2011	[Mokhrin. 2012]
Coccinella septempunctata Linnaeus, 1758	Sochi	Adler, 11.5.2013	43.4252	39.9305	2013	A.O. Bieńkowski1 and M.J. Orlova-Bienkowskaja
Coccinella septempunctata Linnaeus, 1758	Sochi	Adler, Mzymta River Floodplain, 11.5.2013	43.4252	39.9305	2013	A.O. Bieńkowski1 and M.J. Orlova-Bienkowskaja
Coccinella septempunctata Linnaeus, 1758	Sochi	Rosa Khutor, floodplain of Mzymta River, on bushes, 3.5.2013	43.6717	40.2963	2013	A.O. Bieńkowski1 and M.J. Orlova-Bienkowskaja
Coccinella septempunctata Linnaeus, 1758	Anapa	Vicinity of Malyj Utrish, biological station, 26.5-5.6.2014 A.S. Prosvirov	44.7094	37.4572	2014	A.S. Prosvirov
Coccinella septempunctata Linnaeus, 1758	Sochi	Loo, 15.2.2014	43.7047	39.5841	2014	A.O. Bieńkowski1 and M.J. Orlova-Bienkowskaja
Coccinella septempunctata Linnaeus, 1758	Sochi	Adler, 24.2.2014	43.4252	39.9305	2014	A.O. Bieńkowski1 and M.J. Orlova-Bienkowskaja
Coccinella septempunctata Linnaeus, 1758	Sochi	Adler, Olympic Park, 15.2.2014	43.4062	39.9546	2014	A.O. Bieńkowski1 and M.J. Orlova-Bienkowskaja
Coccinella septempunctata Linnaeus, 1758	Anapa	Vicinity of Malyj Utrish, Shirokaya shchel, sweep netting of grasses near the road, 7.5.2016	44.7227	37.4525	2016	A.O. Bieńkowski1 and M.J. Orlova-Bienkowskaja
Coccinella septempunctata Linnaeus, 1758	Anapa	Vicinity of Malyj Utrish, Sukhoj Liman, sweep netting, 7.5.2016	44.7549	37.4562	2016	A.O. Bieńkowski1 and M.J. Orlova-Bienkowskaja
Coccinella septempunctata Linnaeus, 1758	Anapa	Vicinity of Malyj Utrish, bushes near the seashore, 6.5.2016	44.7094	37.4572	2016	A.O. Bieńkowski1 and M.J. Orlova-Bienkowskaja
Coccinella septempunctata Linnaeus, 1758	Anapa	Vicinity of Malyj Utrish, Lobanova Shchel, sweep netting of grasses and shaking of bushes, 6.5.2016	44.7095	37.4755	2016	A.O. Bieńkowski1 and M.J. Orlova-Bienkowskaja
Coccinella septempunctata Linnaeus, 1758	Anapa	Vicinity of Malyj Utrish, Lobanova Shchel, 9.5.2016	44.7095	37.4755	2016	A.O. Bieńkowski1 and M.J. Orlova-Bienkowskaja
Coccinella septempunctata Linnaeus, 1758	Novorossijsk	Dyurso River floodplain, sweep netting of grasses, 8.5.2016	44.6847	37.564	2016	A.O. Bieńkowski1 and M.J. Orlova-Bienkowskaja
Coccinella septempunctata Linnaeus, 1758	Novorossijsk	Abrau River floodplain, sweep netting, 8.5.2016	44.7003	37.5973	2016	A.O. Bieńkowski1 and M.J. Orlova-Bienkowskaja
Coccinella septempunctata Linnaeus, 1758	Gelendzhik	Gelendzhik, 11.5.2016	44.5611	38.0768	2016	A.O. Bieńkowski1 and M.J. Orlova-Bienkowskaja
Coccinella septempunctata Linnaeus, 1758	Sochi	Gornyj Vozdukh railway station, sweep netting of grasses and bushes, 20.5.2016	43.6801	39.6	2016	A.O. Bieńkowski1 and M.J. Orlova-Bienkowskaja
Coccinella septempunctata Linnaeus, 1758	Sochi	Adler, Imeretinskaya lowland, the lawn, sweep netting, 19.5.2016	43.41	39.9787	2016	A.O. Bieńkowski1 and M.J. Orlova-Bienkowskaja
Coccinella septempunctata Linnaeus, 1758	Gelendzhik	Gelendzhik, vicinity of Marjina Roshcha, vineyard	44.6191	38.0293	2017	A.S. Bondarenko
Coccinella septempunctata Linnaeus, 1758	Sochi	Vicinity of Sochi, tea plantation, near Nol' Pass	43.7863	39.6546	2017	A.S. Bondarenko
Coccinella septempunctata Linnaeus, 1758	Sochi	Vicinity of Sochi, tea plantation near Solokh-Aul	43.7989	39.6766	2017	A.S. Bondarenko
Coccinella septempunctata Linnaeus, 1758	Sochi	Sochi, Fabritsiusa Street, wasteland, sweep netting, 7.6.2017	43.5795	39.7492	2017	A.O. Bieńkowski1 and M.J. Orlova-Bienkowskaja
Coccinella septempunctata Linnaeus, 1758	Sochi	Plastunka, road edges, sweep netting, 5.6.2017	43.6825	39.761	2017	A.O. Bieńkowski1 and M.J. Orlova-Bienkowskaja
Coccinella septempunctata Linnaeus, 1758	Sochi	Razdolnoe, 6.6.2017	43.5834	39.7716	2017	A.O. Bieńkowski1 and M.J. Orlova-Bienkowskaja
Coccinella septempunctata Linnaeus, 1758	Sochi	Adler, Olympic Village and Olympic Park, sweep netting of the lawn, 8.6.2017	43.4062	39.9546	2017	A.O. Bieńkowski1 and M.J. Orlova-Bienkowskaja
Coccinella septempunctata Linnaeus, 1758	Sochi	Adler, near Imeretinskij Resort railway station, wasteland, sweep netting at night, 15.6.2017	43.4119	39.9743	2017	A.O. Bieńkowski1 and M.J. Orlova-Bienkowskaja
Coccinella septempunctata Linnaeus, 1758	Sochi	Adler, Imeretinskaya lowland, bank of the pond, sweep netting, 11.6.2017	43.41	39.9787	2017	A.O. Bieńkowski1 and M.J. Orlova-Bienkowskaja
Coccinella septempunctata Linnaeus, 1758	Sochi	Adler, Imeretinskaya lowland, wasteland, sweep netting, 16.6.2017	43.41	39.9787	2017	A.O. Bieńkowski1 and M.J. Orlova-Bienkowskaja
Coccinella septempunctata Linnaeus, 1758	Anapa	Sukko, 06.2018	44.7913	37.4023	2018	E.A. Khachikov
Coccinella septempunctata Linnaeus, 1758	Sochi	Sochi, Sochi River floodplain, sweep netting of grasses, 22.4.2018	43.5914	39.7188	2018	A.O. Bieńkowski1 and M.J. Orlova-Bienkowskaja
Coccinella septempunctata Linnaeus, 1758	Sochi	Sochi, floodplain of Sochi river, right bank upstreem Podgornaya Street, sweep netting, 27.4.2018	43.6187	39.7322	2018	A.O. Bieńkowski1 and M.J. Orlova-Bienkowskaja
Coccinella septempunctata Linnaeus, 1758	Sochi	Sochi, Plastunskaya Street, wasteland, sweep netting, 10.5.2018	43.6188	39.7415	2018	A.O. Bieńkowski1 and M.J. Orlova-Bienkowskaja
Coccinella septempunctata Linnaeus, 1758	Sochi	Piket Mountain, deciduous forest, sweep netting of bushes, 11.5.2018	43.6433	39.7883	2018	A.O. Bieńkowski1 and M.J. Orlova-Bienkowskaja
Coccinella septempunctata Linnaeus, 1758	Sochi	Adler, near Olympic Village railway station, waste land, sweep netting, 4.5.2018	43.4177	39.9462	2018	A.O. Bieńkowski1 and M.J. Orlova-Bienkowskaja
Coccinella septempunctata Linnaeus, 1758	Sochi	Adler, near Imeretinskij Resort railway station, wasteland, sweep netting, 6.5.2018	43.4119	39.9743	2018	A.O. Bieńkowski1 and M.J. Orlova-Bienkowskaja
Coccinella septempunctata Linnaeus, 1758	Sochi	Adler, Veseloe, tangerine garden, shaking of bushes, 14.5.2018	43.4096	39.9842	2018	A.O. Bieńkowski1 and M.J. Orlova-Bienkowskaja
Coccinella septempunctata Linnaeus, 1758	Anapa	Malyj Utrish 25.05-4.06.2019	44.7094	37.4572	2019	O.A. Belyaev
Coccinella septempunctata Linnaeus, 1758	Sochi	Adler, Moldovka, shaking of bushes at night 16-17.9.2020	43.4551	39.9499	2020	A.O. Bieńkowski1 and M.J. Orlova-Bienkowskaja
Coccinella septempunctata Linnaeus, 1758	Sochi	Adler, Moldovka, floodplain of Mzymta river, sweep netting and shaking of bushes, 17.9.2020	43.4649	39.9752	2020	A.O. Bieńkowski1 and M.J. Orlova-Bienkowskaja
Coccinella septempunctata Linnaeus, 1758	Sochi	Adler, Moldovka, floodplain of Mzymta river, sweep netting and shaking of bushes, 18.9.2020	43.4649	39.9752	2020	A.O. Bieńkowski1 and M.J. Orlova-Bienkowskaja
Coccinella septempunctata Linnaeus, 1758	Sochi	Adler, deciduous forest near the road in the vicinity of the garden community "Vysokoe", sweep netting and shaking of bushes, 20.9.2020	43.4976	39.9768	2020	A.O. Bieńkowski1 and M.J. Orlova-Bienkowskaja
Coccinella septempunctata Linnaeus, 1758	Sochi	Adler, glade in the deciduous forest on the mountain ridge on the way from garden community "Vysokoe" to garden community "Dorozhnik", sweep netting and shaking of bushes, 23.9.2020	43.4976	39.9768	2020	A.O. Bieńkowski1 and M.J. Orlova-Bienkowskaja
Coccinella undecimpunctata Linnaeus, 1758	Sochi	Krasnodar region, Sochi, 13.06.2008 A.V. Korovin	43.5855	39.7231	2008	A.S. Sazhnev
Coccinula quatuordecimpustulata (Linnaeus, 1758)	Sochi	Kutshuk-Dere, 29.6.1901, Grinevetsk	43.6865	39.5972	1901	Zoological Institute, Russian Academy of Sciences
Coccinula quatuordecimpustulata (Linnaeus, 1758)	Sochi	Adler, 06-1906, G. Sumakov	43.4476	39.9392	1906	Zoological Institute, Russian Academy of Sciences
Coccinula quatuordecimpustulata (Linnaeus, 1758)	Gelendzhik	Gelendzhik, Chernomorskaya Province, N. Vorob'ev	44.5611	38.0768	1912	Zoological Institute, Russian Academy of Sciences
Coccinula quatuordecimpustulata (Linnaeus, 1758)	Tuapsinskiy district	Vicinity of Tuapse. Marjino, Chernomorskaya Province, 1912, Sakhnovskij	44.0946	39.0731	1912	Zoological Institute, Russian Academy of Sciences
Coccinula quatuordecimpustulata (Linnaeus, 1758)	Sochi	Sochi, 10.8.1927 and 17.7.1927, I. Gudim	43.5855	39.7231	1927	Zoological Institute, Russian Academy of Sciences
Coccinula quatuordecimpustulata (Linnaeus, 1758)	Sochi	Lazarevskaya, Krasnodar region, 5 and 15.8.1952, V. Rudolf	43.9084	39.3334	1952	Zoological Institute, Russian Academy of Sciences
Coccinula quatuordecimpustulata (Linnaeus, 1758)	Sochi	Sochi, 12.6.1957, Garnovskaya	43.5855	39.7231	1957	Zoological Institute, Russian Academy of Sciences
Coccinula quatuordecimpustulata (Linnaeus, 1758)	Sochi	Vicinity of Sochi, 1-15.6.1971, A.L. Lobanov	43.5855	39.7231	1971	Zoological Institute, Russian Academy of Sciences
Coccinula quatuordecimpustulata (Linnaeus, 1758)	Sochi	Sochi, 1987, V.L. Filippov	43.5855	39.7231	1987	V.L. Filippov
Coccinula quatuordecimpustulata (Linnaeus, 1758)	Anapa	Anapa, cliff at the sea, sweep netting of grasses, 12.8.1990 and 18.8.1990	44.895	37.3162	1990	A.O. Bieńkowski1 and M.J. Orlova-Bienkowskaja
Coccinula quatuordecimpustulata (Linnaeus, 1758)	Anapa	Anapa, Dzhemete, meadow, sweep netting, 15.8.1990, 16.8.1990 and 13.8.1990	44.9513	37.3237	1990	A.O. Bieńkowski1 and M.J. Orlova-Bienkowskaja
Coccinula quatuordecimpustulata (Linnaeus, 1758)	Anapa	Vicinity of Malyj Utrish, sweep netting of grasses near the biological station, 23.5.1995	44.7094	37.4572	1995	A.O. Bieńkowski1 and M.J. Orlova-Bienkowskaja
Coccinula quatuordecimpustulata (Linnaeus, 1758)	Novorossijsk	Abrau, the meadow near the pond, 14.5.1995	44.7003	37.5973	1995	A.O. Bieńkowski1 and M.J. Orlova-Bienkowskaja
Coccinula quatuordecimpustulata (Linnaeus, 1758)	Gelendzhik	Vicinity of Gelendzhik, mountains, 12.09.2006	44.561	38.0771	2006	personal communication by R.N. Ishin
Coccinula quatuordecimpustulata (Linnaeus, 1758)	Sochi	Razdolnoe, sweep netting of grasses, 24.5.2008	43.5834	39.7716	2008	A.O. Bieńkowski1 and M.J. Orlova-Bienkowskaja
Coccinula quatuordecimpustulata (Linnaeus, 1758)	Anapa	Anapa, Black See Coast Blagoveshchenskoe 45°03’N, 37°03’E, M. Danilevsky 9.6.2010	45.0558	37.1318	2010	M.L. Danilevsky
Coccinula quatuordecimpustulata (Linnaeus, 1758)	Sochi	Sochi	43.5855	39.7231	2011	[Mokhrin. 2012]
Coccinula quatuordecimpustulata (Linnaeus, 1758)	Anapa	Vicinity of Malyj Utrish, biological station, 29.5-6.6.2013 A.S. Prosvirov	44.7094	37.4572	2013	A.S. Prosvirov
Coccinula quatuordecimpustulata (Linnaeus, 1758)	Tuapsinskiy district	Tuapse, deciduous forest on the hill, 7.5.2013	44.0956	39.0736	2013	A.O. Bieńkowski1 and M.J. Orlova-Bienkowskaja
Coccinula quatuordecimpustulata (Linnaeus, 1758)	Sochi	Razdolnoe, the hill, forest of the decidous forest, sweep netting, 1.5.2013	43.5834	39.7716	2013	A.O. Bieńkowski1 and M.J. Orlova-Bienkowskaja
Coccinula quatuordecimpustulata (Linnaeus, 1758)	Sochi	Adler, Kurortnyj Gorodok, lawn, sweep netting, 11.5.2013	43.4681	39.8968	2013	A.O. Bieńkowski1 and M.J. Orlova-Bienkowskaja
Coccinula quatuordecimpustulata (Linnaeus, 1758)	Sochi	Psou, roadside, wasteland, sweep netting, 2.5.2013	43.3951	40.0082	2013	A.O. Bieńkowski1 and M.J. Orlova-Bienkowskaja
Coccinula quatuordecimpustulata (Linnaeus, 1758)	Gelendzhik	Gelendzhik, Cape Tolsty, wasteland, former vineyard, sweep netting, 10.5.2016	44.5511	38.063	2016	A.O. Bieńkowski1 and M.J. Orlova-Bienkowskaja
Coccinula quatuordecimpustulata (Linnaeus, 1758)	Gelendzhik	Gelendzhik, wasteland, former vineyard, sweep netting, 12.5.2016	44.5611	38.0768	2016	A.O. Bieńkowski1 and M.J. Orlova-Bienkowskaja
Coccinula quatuordecimpustulata (Linnaeus, 1758)	Sochi	Gornyj Vozdukh railway station, sweep netting of grasses and bushes, 20.5.2016	43.6801	39.6	2016	A.O. Bieńkowski1 and M.J. Orlova-Bienkowskaja
Coccinula quatuordecimpustulata (Linnaeus, 1758)	Sochi	Lower Uch-Dere, sweep netting, 20.5.2016	43.6595	39.6271	2016	A.O. Bieńkowski1 and M.J. Orlova-Bienkowskaja
Coccinula quatuordecimpustulata (Linnaeus, 1758)	Sochi	Sochi, sweep netting of plants in the street, 18.5.2016	43.5855	39.7231	2016	A.O. Bieńkowski1 and M.J. Orlova-Bienkowskaja
Coccinula quatuordecimpustulata (Linnaeus, 1758)	Sochi	Sochi, Fabritsiusa Street, wasteland, sweep netting, 23.5.2016	43.5795	39.7492	2016	A.O. Bieńkowski1 and M.J. Orlova-Bienkowskaja
Coccinula quatuordecimpustulata (Linnaeus, 1758)	Sochi	Sochi, forest edge, sweep netting, 18.6.2016	43.5704	39.7561	2016	A.O. Bieńkowski1 and M.J. Orlova-Bienkowskaja
Coccinula quatuordecimpustulata (Linnaeus, 1758)	Sochi	Adler, near the airport waste land and roadside, sweep netting, 22.5.2016	43.4476	39.9392	2016	A.O. Bieńkowski1 and M.J. Orlova-Bienkowskaja
Coccinula quatuordecimpustulata (Linnaeus, 1758)	Sochi	Adler, near the airport waste land and roadside, sweep netting, 22.5.2016	43.4476	39.9392	2016	A.O. Bieńkowski1 and M.J. Orlova-Bienkowskaja
Coccinula quatuordecimpustulata (Linnaeus, 1758)	Sochi	Adler, Imeretinskaya lowland, wasteland along the chanel and railway, sweep netting on grasses, 19.5.2016	43.41	39.9787	2016	A.O. Bieńkowski1 and M.J. Orlova-Bienkowskaja
Coccinula quatuordecimpustulata (Linnaeus, 1758)	Sochi	Adler, Imeretinskaya lowland, lawn, sweep netting, 19.5.2016	43.41	39.9787	2016	A.O. Bieńkowski1 and M.J. Orlova-Bienkowskaja
Coccinula quatuordecimpustulata (Linnaeus, 1758)	Sochi	Adler, bank of Psou River, sweep netting, 22.5.2016	43.3952	40.0085	2016	A.O. Bieńkowski1 and M.J. Orlova-Bienkowskaja
Coccinula quatuordecimpustulata (Linnaeus, 1758)	Gelendzhik	Gelendzhik, vicinity of Marjina Roshcha, vineyard	44.6191	38.0293	2017	A.S. Bondarenko
Coccinula quatuordecimpustulata (Linnaeus, 1758)	Sochi	Vicinity of Sochi, tea plantation, near Nol' Pass	43.7863	39.6546	2017	A.S. Bondarenko
Coccinula quatuordecimpustulata (Linnaeus, 1758)	Sochi	Vicinity of Sochi, tea plantation near Solokh-Aul	43.7989	39.6766	2017	A.S. Bondarenko
Coccinula quatuordecimpustulata (Linnaeus, 1758)	Sochi	Sochi, floodplain of Sochi river, right bank upstreem Podgornaya Street, sweep netting, 10.6.2017	43.6187	39.7322	2017	A.O. Bieńkowski1 and M.J. Orlova-Bienkowskaja
Coccinula quatuordecimpustulata (Linnaeus, 1758)	Sochi	Sochi, Fabritsiusa Street, wasteland, sweep netting, 2.6.2017	43.5795	39.7492	2017	A.O. Bieńkowski1 and M.J. Orlova-Bienkowskaja
Coccinula quatuordecimpustulata (Linnaeus, 1758)	Sochi	Sochi,Fabritsiusa Street, wasteland, sweep netting, 7.6.2017	43.5795	39.7492	2017	A.O. Bieńkowski1 and M.J. Orlova-Bienkowskaja
Coccinula quatuordecimpustulata (Linnaeus, 1758)	Sochi	Plastunka, sweep netting, 5.6.2017	43.6825	39.761	2017	A.O. Bieńkowski1 and M.J. Orlova-Bienkowskaja
Coccinula quatuordecimpustulata (Linnaeus, 1758)	Sochi	Razdolnoe, floodplain of Mzymta River, meadow and wasteland, sweep netting, 6.6.2017	43.5834	39.7716	2017	A.O. Bieńkowski1 and M.J. Orlova-Bienkowskaja
Coccinula quatuordecimpustulata (Linnaeus, 1758)	Sochi	Adler, Imeretinskij Resort, waste land, sweep netting at night, 15.6.2017	43.4119	39.9743	2017	A.O. Bieńkowski1 and M.J. Orlova-Bienkowskaja
Coccinula quatuordecimpustulata (Linnaeus, 1758)	Sochi	Adler, Imeretinskaya lowland, bank of the pond, sweep netting, 11.6.2017	43.41	39.9787	2017	A.O. Bieńkowski1 and M.J. Orlova-Bienkowskaja
Coccinula quatuordecimpustulata (Linnaeus, 1758)	Sochi	Adler, Imeretinskaya lowland, wasteland, sweep netting, 11.6.2017	43.41	39.9787	2017	A.O. Bieńkowski1 and M.J. Orlova-Bienkowskaja
Coccinula quatuordecimpustulata (Linnaeus, 1758)	Sochi	Adler, Imeretinskaya lowland, wasteland, sweep netting, 16.6.2017	43.41	39.9787	2017	A.O. Bieńkowski1 and M.J. Orlova-Bienkowskaja
Coccinula quatuordecimpustulata (Linnaeus, 1758)	Anapa	Sukko, 26-30.04.2018	44.7913	37.4023	2018	E.A. Khachikov
Coccinula quatuordecimpustulata (Linnaeus, 1758)	Sochi	Veseloe, 2.11.2018	43.4175	40.0074	2018	E.A. Khachikov
Coccinula quatuordecimpustulata (Linnaeus, 1758)	Sochi	Golovinka, Shakhe River floodplain, sweep netting of grasses, 12.5.2018	43.7938	39.4688	2018	A.O. Bieńkowski1 and M.J. Orlova-Bienkowskaja
Coccinula quatuordecimpustulata (Linnaeus, 1758)	Sochi	Sochi, Sochi River floodplain, sweep netting, 27.4.2018	43.5959	39.7226	2018	A.O. Bieńkowski1 and M.J. Orlova-Bienkowskaja
Coccinula quatuordecimpustulata (Linnaeus, 1758)	Sochi	Razbityj Kotel, forest and meadows on the hill, sweep netting, 30.4.2018	43.6854	39.7287	2018	A.O. Bieńkowski1 and M.J. Orlova-Bienkowskaja
Coccinula quatuordecimpustulata (Linnaeus, 1758)	Sochi	Sochi, floodplain of Sochi river, right bank upstreem Podgornaya Street, sweep netting, 27.4.2018	43.6187	39.7322	2018	A.O. Bieńkowski1 and M.J. Orlova-Bienkowskaja
Coccinula quatuordecimpustulata (Linnaeus, 1758)	Sochi	Adler, near Olympic Village railway station, waste land, sweep netting, 4.5.2018	43.4177	39.9462	2018	A.O. Bieńkowski1 and M.J. Orlova-Bienkowskaja
Coccinula quatuordecimpustulata (Linnaeus, 1758)	Sochi	Adler, near Imeretinskij Resort railway station, waste land near the chanel, sweep netting, 4.5.2018	43.4119	39.9743	2018	A.O. Bieńkowski1 and M.J. Orlova-Bienkowskaja
Coccinula quatuordecimpustulata (Linnaeus, 1758)	Sochi	Adler, near Imeretinskij Resort railway station, wasteland, sweep netting, 6.5.2018	43.4119	39.9743	2018	A.O. Bieńkowski1 and M.J. Orlova-Bienkowskaja
Coccinula quatuordecimpustulata (Linnaeus, 1758)	Sochi	Adler, Moldovka, on thehill, shaking of bushes, 19.9.2020	43.4579	39.9441	2020	A.O. Bieńkowski1 and M.J. Orlova-Bienkowskaja
Coccinula quatuordecimpustulata (Linnaeus, 1758)	Sochi	Adler, near the reilway station "Olimpic Park", wasteland, sweep netting, 25.9.2020	43.4132	39.9695	2020	A.O. Bieńkowski1 and M.J. Orlova-Bienkowskaja
Coccinula quatuordecimpustulata (Linnaeus, 1758)	Sochi	Adler, near the reilway station "Olimpic Park", wasteland, sweep netting, 24.9.2020	43.4132	39.9695	2020	A.O. Bieńkowski1 and M.J. Orlova-Bienkowskaja
Coccinula quatuordecimpustulata (Linnaeus, 1758)	Sochi	Adler, Moldovka, floodplain of Mzymta river near the footbridge, sweep netting and shaking of bushes, 17.9.2020	43.4649	39.9752	2020	A.O. Bieńkowski1 and M.J. Orlova-Bienkowskaja
Coccinula quatuordecimpustulata (Linnaeus, 1758)	Sochi	Adler,Moldovka, floodplain of Mzymta river, sweep netting and shaking of bushes, 18.9.2020	43.4649	39.9752	2020	A.O. Bieńkowski1 and M.J. Orlova-Bienkowskaja
Coccinula quatuordecimpustulata (Linnaeus, 1758)	Sochi	Adler, the garden community "Vysokoe", on the ruderal vegetation and in the garden, sweep netting, 20.9.2020	43.4976	39.9768	2020	A.O. Bieńkowski1 and M.J. Orlova-Bienkowskaja
Coccinula quatuordecimpustulata (Linnaeus, 1758)	Sochi	Adler, glade in the deciduous forest on the mountain ridge on the way from garden community "Vysokoe" to garden community "Dorozhnik", sweep netting and shaking of bushes, 23.9.2020	43.4976	39.9768	2020	A.O. Bieńkowski1 and M.J. Orlova-Bienkowskaja
Coccinula sinuatomarginata (Faldermann, 1837)	Anapa	Anapa, 7.1910	44.895	37.3162	1910	[Bogdanov-Katjkov, 1916]
Coccinula sinuatomarginata (Faldermann, 1837)	Novorossijsk	Novorossijsk, Anapskoe Roadway, 7.1911	44.7343	37.7459	1911	[Bogdanov-Katjkov, 1916]
Coccinula sinuatomarginata (Faldermann, 1837)	Gelendzhik	Gelendzhik, Chernomorskaya Province, N. Vorob'ev	44.5611	38.0768	1912	Zoological Institute, Russian Academy of Sciences
Cryptolaemus montrouzieri Mulsant, 1853	Sochi	Sochi	43.5855	39.7231	2011	[Belyakova, Polikarpova, 2012]
Cryptolaemus montrouzieri Mulsant, 1853	Sochi	Sovkhoz "Russia", Adler district of Sochi	43.3907	39.9848	2012	A.G. Koval
Cryptolaemus montrouzieri Mulsant, 1853	Sochi	Sochi	43.5855	39.7231	2012	[Belyakova, Polikarpova, 2012]
Cryptolaemus montrouzieri Mulsant, 1853	Sochi	Sochi, Arboretum, on oleander, 10.5.2013	43.5718	39.7428	2013	A.O. Bieńkowski1 and M.J. Orlova-Bienkowskaja
Cryptolaemus montrouzieri Mulsant, 1853	Sochi	Sochi, on oleander, 17.5.2016	43.5855	39.7231	2016	A.O. Bieńkowski1 and M.J. Orlova-Bienkowskaja
Cryptolaemus montrouzieri Mulsant, 1853	Sochi	Sochi, right bank of Sochi river, embankment, shaking of thuja, 15.5.2018	43.5959	39.7226	2018	A.O. Bieńkowski1 and M.J. Orlova-Bienkowskaja
Cryptolaemus montrouzieri Mulsant, 1853	Sochi	Sochi, shaking of bushes in the evening, 9.5.2018	43.5855	39.7231	2018	A.O. Bieńkowski1 and M.J. Orlova-Bienkowskaja
Cryptolaemus montrouzieri Mulsant, 1853	Sochi	Sochi, Seafront, shaking of bushes in the evening, 1.5.2018	43.5736	39.7269	2018	A.O. Bieńkowski1 and M.J. Orlova-Bienkowskaja
Cryptolaemus montrouzieri Mulsant, 1853	Sochi	Sochi, Seafront, on oleander, 1.5.2018	43.5736	39.7269	2018	A.O. Bieńkowski1 and M.J. Orlova-Bienkowskaja
Cryptolaemus montrouzieri Mulsant, 1853	Sochi	Sochi, Fabritsiusa Street, hibiscus, 11.5.2018	43.5795	39.7492	2018	A.O. Bieńkowski1 and M.J. Orlova-Bienkowskaja
Cryptolaemus montrouzieri Mulsant, 1853	Sochi	Adler, Veseloe, tangerine garden, shaking of bushes, 14.5.2018	43.4096	39.9842	2018	A.O. Bieńkowski1 and M.J. Orlova-Bienkowskaja
Cryptolaemus montrouzieri Mulsant, 1853	Sochi	Adler, shaking of bushes at night near the railway station "Airport", 22-23.9.2020	43.4495	39.9409	2020	A.O. Bieńkowski1 and M.J. Orlova-Bienkowskaja
Cryptolaemus montrouzieri Mulsant, 1853	Sochi	Adler, shaking of bushes near the airport, 17-18.9.2020	43.4531	39.9559	2020	A.O. Bieńkowski1 and M.J. Orlova-Bienkowskaja
Cryptolaemus montrouzieri Mulsant, 1853	Sochi	Adler, Veseloe, tangerine garden, shaking of branches of the tangerine trees, 24.9.2020	43.4096	39.9842	2020	A.O. Bieńkowski1 and M.J. Orlova-Bienkowskaja
Exochomus quadripustulatus (Linnaeus, 1758)	Sochi	Sochi, 21.7.1927, I. Gudim	43.5855	39.7231	1927	Zoological Institute, Russian Academy of Sciences
Exochomus quadripustulatus (Linnaeus, 1758)	Anapa	Anapa, Varvarovka, 8.5.1970	44.8263	37.3675	1970	collection of S.M. Yablokov-Hnzoryan in Scientific Center of Zoology and Hydroecology, National Academy of Sciences of Armenia, Erevan, Armenia
Exochomus quadripustulatus (Linnaeus, 1758)	Sochi	Sochi, on Oleander, 17.5.2016	43.5855	39.7231	2016	A.O. Bieńkowski1 and M.J. Orlova-Bienkowskaja
Exochomus quadripustulatus (Linnaeus, 1758)	Sochi	Sochi, 19.6.2017	43.5855	39.7231	2017	A.O. Bieńkowski1 and M.J. Orlova-Bienkowskaja
Exochomus quadripustulatus (Linnaeus, 1758)	Sochi	Sochi, shaking of bushes in the evening, 12.6.2017	43.5855	39.7231	2017	A.O. Bieńkowski1 and M.J. Orlova-Bienkowskaja
Exochomus quadripustulatus (Linnaeus, 1758)	Sochi	Sochi, 1.5.2018	43.5855	39.7231	2018	A.O. Bieńkowski1 and M.J. Orlova-Bienkowskaja
Exochomus quadripustulatus (Linnaeus, 1758)	Sochi	Sochi, on oleander, 30.4.2018	43.5855	39.7231	2018	A.O. Bieńkowski1 and M.J. Orlova-Bienkowskaja
Exochomus quadripustulatus (Linnaeus, 1758)	Sochi	Sochi, shaking of bushes in the evening, 11.5.2018	43.5855	39.7231	2018	A.O. Bieńkowski1 and M.J. Orlova-Bienkowskaja
Exochomus quadripustulatus (Linnaeus, 1758)	Sochi	Sochi, on bushes, 8.5.2018	43.5855	39.7231	2018	A.O. Bieńkowski1 and M.J. Orlova-Bienkowskaja
Exochomus quadripustulatus (Linnaeus, 1758)	Sochi	Sochi, Seafront, shaking of bushes in the evening, 1.5.2018	43.5736	39.7269	2018	A.O. Bieńkowski1 and M.J. Orlova-Bienkowskaja
Exochomus quadripustulatus (Linnaeus, 1758)	Sochi	Sochi, Seafront, on bushes, 1.5.2018	43.5736	39.7269	2018	A.O. Bieńkowski1 and M.J. Orlova-Bienkowskaja
Exochomus quadripustulatus (Linnaeus, 1758)	Sochi	Adler, Imeretinsky resort railway station, on thuja, 6.5.2018	43.4119	39.9743	2018	A.O. Bieńkowski1 and M.J. Orlova-Bienkowskaja
Exochomus quadripustulatus (Linnaeus, 1758)	Sochi	Adler, near the airport and the railway station "Airport", shaking of bushes at night, 17-18.9.2020	43.4495	39.9409	2020	A.O. Bieńkowski1 and M.J. Orlova-Bienkowskaja
Exochomus quadripustulatus (Linnaeus, 1758)	Sochi	Adler, Moldovka, shaking of bushes in the street, 17.9.2020	43.466	39.9612	2020	A.O. Bieńkowski1 and M.J. Orlova-Bienkowskaja
Halyzia sedecimguttata (Linnaeus, 1758)	Sochi	Sochi, Chernomorskaya Province, dacha of Mashitskaya, 22.8.1915	43.5716	39.7384	1915	Zoological Institute, Russian Academy of Sciences
Halyzia sedecimguttata (Linnaeus, 1758)	Sochi	Sochi, 1987, V.L. Filippov	43.5855	39.7231	1987	V.L. Filippov
Halyzia sedecimguttata (Linnaeus, 1758)	Gelendzhik	Vicinity of Gelendzhik, near Mikhajlovskij Pass, the gorge and the meadow, sweep netting, 5.9.1990	44.5116	38.3192	1990	A.O. Bieńkowski1 and M.J. Orlova-Bienkowskaja
Halyzia sedecimguttata (Linnaeus, 1758)	Sochi	Sochi, Khosta 07.1996 Brunova	43.5128	39.8737	1996	M.E. Smirnov
Halyzia sedecimguttata (Linnaeus, 1758)	Sochi	60 east to Sochi, Caucasian Nature Reserve, Pslukh, 1100 m a.s.l., light trap, 13.8.2001, M.N. Tsurikov	43.6615	40.3964	2001	Zoological Institute, Russian Academy of Sciences
Halyzia sedecimguttata (Linnaeus, 1758)	Sochi	Krasnodar region, 10 km east to Sochi, near Zmejka River, 1.4.2008, M.N. Tsurikov	43.6558	39.8125	2008	Zoological Institute, Russian Academy of Sciences
Halyzia sedecimguttata (Linnaeus, 1758)	Sochi	Sochi	43.5855	39.7231	2011	[Mokhrin. 2012]
Halyzia sedecimguttata (Linnaeus, 1758)	Sochi	Sochi reg., 30 km NNO Adler, Chvizhepse, 250-800 a.s.l, 29.4-6.5.2013, Sv. Kurbatova leg.	43.6311	40.0863	2013	All-Russian center for plant quarantine
Halyzia sedecimguttata (Linnaeus, 1758)	Sochi	Abazinka, 6.5.2013	43.6089	39.8256	2013	A.O. Bieńkowski1 and M.J. Orlova-Bienkowskaja
Halyzia sedecimguttata (Linnaeus, 1758)	Sochi	Semenovka, 4.5.2013	43.6419	39.8502	2013	A.O. Bieńkowski1 and M.J. Orlova-Bienkowskaja
Halyzia sedecimguttata (Linnaeus, 1758)	Anapa	Vicinity of Malyj Utrish, biological station, 26.5-5.6.2014 A.S. Prosvirov	44.7094	37.4572	2014	A.S. Prosvirov
Halyzia sedecimguttata (Linnaeus, 1758)	Sochi	Latitude: 43.696774, Londitude: 40.266159, 15 of November 2018	43.6968	40.2662	2018	https://www.inaturalist.org/observations/18637502
Halyzia sedecimguttata (Linnaeus, 1758)	Sochi	Sochi, Piket mountain, road in the forest, sweep netting of bushes and grasses, 11.5.2018	43.6433	39.7883	2018	A.O. Bieńkowski1 and M.J. Orlova-Bienkowskaja
Halyzia sedecimguttata (Linnaeus, 1758)	Sochi	Khosta, Kurortnyj prospect, 30 of July 2019, 43.544055, 39.790358	43.5441	39.7904	2019	https://www.inaturalist.org/observations/29842825
Halyzia sedecimguttata (Linnaeus, 1758)	Sochi	Adler, Moldovka, glade of the power line on the hill, sweep netting, shaking of bushes, 17.9.2020	43.4579	39.9441	2020	A.O. Bieńkowski1 and M.J. Orlova-Bienkowskaja
Halyzia sedecimguttata (Linnaeus, 1758)	Sochi	Adler, Moldovka, on the hill, shaking of bushes, 19.9.2020	43.4579	39.9441	2020	A.O. Bieńkowski1 and M.J. Orlova-Bienkowskaja
Halyzia sedecimguttata (Linnaeus, 1758)	Sochi	Adler, Moldovka, floodplain of Mzymta river, sweep netting and shaking of bushes, 18.9.2020	43.4649	39.9752	2020	A.O. Bieńkowski1 and M.J. Orlova-Bienkowskaja
Halyzia sedecimguttata (Linnaeus, 1758)	Sochi	Uch-Dere, W. Caucasus, collection of Rybakov, Kenig leg.	43.6595	39.6271	~1900	Zoological Institute, Russian Academy of Sciences
Harmonia axyridis (Pallas, 1773)	Anapa	Bolshoj Utrish, 15-25.8.2011, A.A. Dergalev	44.7609	37.3864	2011	All-Russian center for plant quarantine
Harmonia axyridis (Pallas, 1773)	Sochi	Krasnodar region, Loo, T.A. Mogilevitch leg.	43.7043	39.5895	2011	[Mogilevich, 2012]
Harmonia axyridis (Pallas, 1773)	Anapa	Bolshoj Utrish, 15–25.VIII.2011, A. Dergalev leg.	44.7609	37.3864	2011	[Ukrainsky, 2013]
Harmonia axyridis (Pallas, 1773)	Anapa	Anapa Distr., hardwood grove on hills near Bol'shoj Raznokol Vill., 30.4.2012, B.A. Korotyaev	45.1481	37.4613	2012	Zoological Institute, Russian Academy of Sciences
Harmonia axyridis (Pallas, 1773)	Anapa	Vicinity of Malyj Utrish, biological station, 29.5-6.6.2013 A.S. Prosvirov	44.7094	37.4572	2013	A.S. Prosvirov
Harmonia axyridis (Pallas, 1773)	Sochi	Loo, 20.8.2013, A. Shulchishina	43.7047	39.5841	2013	A.Yu. Shulchishina
Harmonia axyridis (Pallas, 1773)	Tuapsinskiy district	Tuapse, ornamental bushes, 7.5.2013	44.0956	39.0736	2013	A.O. Bieńkowski1 and M.J. Orlova-Bienkowskaja
Harmonia axyridis (Pallas, 1773)	Sochi	Sochi, the hill near Fabritsiusa Street, the edge of the decidous forest, sweep netting, 30.4.2013	43.5795	39.7492	2013	A.O. Bieńkowski1 and M.J. Orlova-Bienkowskaja
Harmonia axyridis (Pallas, 1773)	Sochi	Sochi, The Twentieth Mountain Rifle Division street, 30.4.2013	43.5714	39.7573	2013	A.O. Bieńkowski1 and M.J. Orlova-Bienkowskaja
Harmonia axyridis (Pallas, 1773)	Sochi	Sochi, Bytkha, 8.5.2013	43.5662	39.7657	2013	A.O. Bieńkowski1 and M.J. Orlova-Bienkowskaja
Harmonia axyridis (Pallas, 1773)	Sochi	Razdolnoe, 1.5.2013	43.5834	39.7716	2013	A.O. Bieńkowski1 and M.J. Orlova-Bienkowskaja
Harmonia axyridis (Pallas, 1773)	Sochi	Abazinka, 6.5.2013	43.6089	39.8256	2013	A.O. Bieńkowski1 and M.J. Orlova-Bienkowskaja
Harmonia axyridis (Pallas, 1773)	Sochi	Semenovka, 4.5.2013	43.6419	39.8502	2013	A.O. Bieńkowski1 and M.J. Orlova-Bienkowskaja
Harmonia axyridis (Pallas, 1773)	Sochi	Adler, floodplain of Mzymta river, 11.5.2013	43.4254	39.9295	2013	A.O. Bieńkowski1 and M.J. Orlova-Bienkowskaja
Harmonia axyridis (Pallas, 1773)	Sochi	Adler, Veseloe, street and waste land, 2.5.2013	43.4175	40.0074	2013	A.O. Bieńkowski1 and M.J. Orlova-Bienkowskaja
Harmonia axyridis (Pallas, 1773)	Sochi	Psou, deciduous forest on the hill, 2.5.2013	43.3951	40.0082	2013	A.O. Bieńkowski1 and M.J. Orlova-Bienkowskaja
Harmonia axyridis (Pallas, 1773)	Sochi	Vicinity of Adler, floodplain of Mzymta River, Monastyr, on bushes, 3.5.2013	43.5919	40.01	2013	A.O. Bieńkowski1 and M.J. Orlova-Bienkowskaja
Harmonia axyridis (Pallas, 1773)	Sochi	Rosa Khutor, floodplain of Mzymta River, on bushes, 3.5.2013	43.6717	40.2963	2013	A.O. Bieńkowski1 and M.J. Orlova-Bienkowskaja
Harmonia axyridis (Pallas, 1773)	Sochi	Sovkhoz "Russia", Adler district of Sochi	43.3907	39.9848	2014	A.G. Koval
Harmonia axyridis (Pallas, 1773)	Anapa	Vicinity of Malyj Utrish, biological station, 26.5-5.6.2014 A.S. Prosvirov	44.7094	37.4572	2014	A.S. Prosvirov
Harmonia axyridis (Pallas, 1773)	Gelendzhik	Gelendzhik district, vicinity of Dzhankhot Ridge, 80-150 m a.s.l., 44˚28’03.9”N 38˚09’25.5”E 31.5-4.6.2016 A.S. Prosvirov	44.4677	38.1569	2016	A.S. Prosvirov
Harmonia axyridis (Pallas, 1773)	Anapa	Vicinity of Malyj Utrish, may 2016	44.7094	37.4572	2016	A.O. Bieńkowski1 and M.J. Orlova-Bienkowskaja
Harmonia axyridis (Pallas, 1773)	Gelendzhik	Gelendzhik, May 2016	44.5611	38.0768	2016	A.O. Bieńkowski1 and M.J. Orlova-Bienkowskaja
Harmonia axyridis (Pallas, 1773)	Sochi	2016: Sochi	43.5736	39.7269	2016	A.O. Bieńkowski1 and M.J. Orlova-Bienkowskaja
Harmonia axyridis (Pallas, 1773)	Sochi	Sochi, the garden "Tree of Frendship", 23.5.2016	43.5671	39.7476	2016	A.O. Bieńkowski1 and M.J. Orlova-Bienkowskaja
Harmonia axyridis (Pallas, 1773)	Sochi	Adler	43.4184	39.9243	2016	A.O. Bieńkowski1 and M.J. Orlova-Bienkowskaja
Harmonia axyridis (Pallas, 1773)	Gelendzhik	Gelendzhik, vicinity of Marjina Roshcha, vineyard	44.6191	38.0293	2017	A.S. Bondarenko
Harmonia axyridis (Pallas, 1773)	Sochi	Sochi, shaking of bushes in the evening, 13.6.2017	43.5855	39.7231	2017	A.O. Bieńkowski1 and M.J. Orlova-Bienkowskaja
Harmonia axyridis (Pallas, 1773)	Sochi	Sochi, in the spider net, 7.6.2017	43.5855	39.7231	2017	A.O. Bieńkowski1 and M.J. Orlova-Bienkowskaja
Harmonia axyridis (Pallas, 1773)	Sochi	Sochi, Sochi river floodplain upstream Podgornaya street, the meadow, sweep netting, 10.6.2017	43.6187	39.7322	2017	A.O. Bieńkowski1 and M.J. Orlova-Bienkowskaja
Harmonia axyridis (Pallas, 1773)	Sochi	Matsesta, lawns, 12.6.2017	43.5444	39.7896	2017	A.O. Bieńkowski1 and M.J. Orlova-Bienkowskaja
Harmonia axyridis (Pallas, 1773)	Sochi	Adler, Imeretinskij Kurort, waste land, sweep netting at night, 15.6.2017	43.4119	39.9743	2017	A.O. Bieńkowski1 and M.J. Orlova-Bienkowskaja
Harmonia axyridis (Pallas, 1773)	Sochi	Adler, Imeretinskaya lowland, wasteland, sweep netting, 16.6.2017	43.41	39.9787	2017	A.O. Bieńkowski1 and M.J. Orlova-Bienkowskaja
Harmonia axyridis (Pallas, 1773)	Anapa	Sukko, 06.2018	44.7913	37.4023	2018	E.A. Khachikov
Harmonia axyridis (Pallas, 1773)	Sochi	Golovinka	43.7938	39.4688	2018	A.O. Bieńkowski1 and M.J. Orlova-Bienkowskaja
Harmonia axyridis (Pallas, 1773)	Sochi	2018: Sochi	43.5736	39.7269	2018	A.O. Bieńkowski1 and M.J. Orlova-Bienkowskaja
Harmonia axyridis (Pallas, 1773)	Sochi	Sochi, Morskaya embarkment, on Oleander, 1.5.2018	43.5736	39.7269	2018	A.O. Bieńkowski1 and M.J. Orlova-Bienkowskaja
Harmonia axyridis (Pallas, 1773)	Sochi	Razbityj Kotel, forest and meadows on the hill, sweep netting, 30.4.2018	43.6854	39.7287	2018	A.O. Bieńkowski1 and M.J. Orlova-Bienkowskaja
Harmonia axyridis (Pallas, 1773)	Sochi	Matsesta	43.5444	39.7896	2018	A.O. Bieńkowski1 and M.J. Orlova-Bienkowskaja
Harmonia axyridis (Pallas, 1773)	Sochi	Adler	43.4184	39.9243	2018	A.O. Bieńkowski1 and M.J. Orlova-Bienkowskaja
Harmonia axyridis (Pallas, 1773)	Sochi	Adler, Olympic Village, shaking of bushes of Phatinia and Viburnum tinus, 4.5.2018	43.4177	39.9462	2018	A.O. Bieńkowski1 and M.J. Orlova-Bienkowskaja
Harmonia axyridis (Pallas, 1773)	Sochi	Adler, Veseloe, tangerine garden, shaking of bushes, 14.5.2018	43.4096	39.9842	2018	A.O. Bieńkowski1 and M.J. Orlova-Bienkowskaja
Harmonia axyridis (Pallas, 1773)	Sochi	Veseloe	43.4175	40.0074	2018	A.O. Bieńkowski1 and M.J. Orlova-Bienkowskaja
Harmonia axyridis (Pallas, 1773)	Anapa	Anapa, 2.6.2019	44.895	37.3162	2019	E.A. Khachikov
Harmonia axyridis (Pallas, 1773)	Sochi	Vicinity of Olympic park, 26-29.3.2019	43.4062	39.9546	2019	E.A. Khachikov
Harmonia axyridis (Pallas, 1773)	Gelendzhik	Gelendzhik, Latitude: 44.57727, longitude: 38.073025, 21.05.2019	44.5773	38.073	2019	https://www.inaturalist.org/observations/25490327
Harmonia axyridis (Pallas, 1773)	Sochi	Latitude: 43.585275, longitude: 39.722112 30 of July 2019	43.5853	39.7221	2019	https://www.inaturalist.org/observations/29875655
Harmonia axyridis (Pallas, 1773)	Anapa	Malyj Utrish 25.05-4.06.2019	44.7094	37.4572	2019	O.A. Belyaev
Harmonia axyridis (Pallas, 1773)	Sochi	Latitude: 43.585037, Londitude: 39.775725 SNT Agroprom 20 of May 2020	43.585	39.7757	2020	https://www.inaturalist.org/observations/46581659
Harmonia axyridis (Pallas, 1773)	Tuapsinskiy district	Vicinity of Nebug, the bank of Nebug river, 29.6-2.7.2020, M.A. Lychak	44.1711	39.0021	2020	M.A. Lychak
Harmonia axyridis (Pallas, 1773)	Tuapsinskiy district	Vicinity of Agoj-Shapsug, the bank of Agoj river, 29.6-2.7.2020, M.A. Lychak	44.1813	39.0685	2020	M.A. Lychak
Harmonia axyridis (Pallas, 1773)	Sochi	Adler, shaking of bushes at night near the railway station "Airport"22-23.9.2020	43.4495	39.9409	2020	A.O. Bieńkowski1 and M.J. Orlova-Bienkowskaja
Harmonia axyridis (Pallas, 1773)	Sochi	Adler, Moldovka, on the hill, shaking of bushes, 19.9.2020	43.4579	39.9441	2020	A.O. Bieńkowski1 and M.J. Orlova-Bienkowskaja
Harmonia axyridis (Pallas, 1773)	Sochi	Adler, Moldovka, glade in the deciduous forest on the hill, the adult is rared from the pupa, collected on 19.9.2020	43.4579	39.9441	2020	A.O. Bieńkowski1 and M.J. Orlova-Bienkowskaja
Harmonia axyridis (Pallas, 1773)	Sochi	Adler, Moldovka, forest edge on the hill, dead adult with the cocoon of Dinocampus coccinellae on the leaf мертвый жук на листе куста над коконом паразитоида, 19.9.2020	43.4579	39.9441	2020	A.O. Bieńkowski1 and M.J. Orlova-Bienkowskaja
Harmonia axyridis (Pallas, 1773)	Sochi	Adler, Moldovka, Pchelovodov street, shaking of bushes at night, 16-17.9.2020	43.455	39.95	2020	A.O. Bieńkowski1 and M.J. Orlova-Bienkowskaja
Harmonia axyridis (Pallas, 1773)	Sochi	Adler, Moldovka, Pchelovodov street, sweep netting and shaking of bushes16.9.2020	43.455	39.95	2020	A.O. Bieńkowski1 and M.J. Orlova-Bienkowskaja
Harmonia axyridis (Pallas, 1773)	Sochi	Adler, deciduous forest по дороге близ СТ Высокое, sweep netting and shaking of bushes, 20.9.2020	43.4976	39.9768	2020	A.O. Bieńkowski1 and M.J. Orlova-Bienkowskaja
Harmonia axyridis (Pallas, 1773)	Sochi	Adler, Veseloe, tangerine garden, shaking of branches of the tangerine trees, 24.9.2020	43.4096	39.9842	2020	A.O. Bieńkowski1 and M.J. Orlova-Bienkowskaja
Harmonia quadripunctata (Pontoppidan, 1763)	Gelendzhik	Gelendzhik, Chernomorskaya Province, N. Vorob'ev	44.5611	38.0768	1912	Zoological Institute, Russian Academy of Sciences
Harmonia quadripunctata (Pontoppidan, 1763)	Sochi	Sochi, Chernomorskaya Province, 30.11.1915, V. Artynov	43.5855	39.7231	1915	Zoological Institute, Russian Academy of Sciences
Harmonia quadripunctata (Pontoppidan, 1763)	Gelendzhik	Gelendzhik, 12.8.1987, A.I. Prikhod’ko	44.5611	38.0768	1987	A.I. Prikhod’ko
Harmonia quadripunctata (Pontoppidan, 1763)	Anapa	Anapa, Dzhemete, sea shore, 3.8.1987	44.9495	37.3036	1987	A.O. Bieńkowski
Harmonia quadripunctata (Pontoppidan, 1763)	Sochi	Sochi, 1987, V.L. Filippov	43.5855	39.7231	1987	V.L. Filippov
Harmonia quadripunctata (Pontoppidan, 1763)	Sochi	Krasnaya Polyana, 7.8.1988, A.G. Koval	43.68	40.2055	1988	Zoological Institute, Russian Academy of Sciences
Harmonia quadripunctata (Pontoppidan, 1763)	Gelendzhik	North-east outscirt of Gelendzhik, wasteland, 10.06.2009	44.5503	38.1299	2009	personal communication by R.N. Ishin
Harmonia quadripunctata (Pontoppidan, 1763)	Sochi	Sochi	43.5855	39.7231	2011	[Mokhrin. 2012]
Harmonia quadripunctata (Pontoppidan, 1763)	Anapa	Vicinity of Malyj Utrish, biological station, 29.5-6.6.2013 A.S. Prosvirov	44.7094	37.4572	2013	A.S. Prosvirov
Harmonia quadripunctata (Pontoppidan, 1763)	Tuapsinskiy district	Tuapse, on ornamental bushes, 7.5.2013	44.0956	39.0736	2013	A.O. Bieńkowski1 and M.J. Orlova-Bienkowskaja
Harmonia quadripunctata (Pontoppidan, 1763)	Gelendzhik	Gelendzhik district, vicinity of Dzhankhot Ridge, 80-150 m a.s.l., 44˚28’03.9”N 38˚09’25.5”E 31.5-4.6.2016 A.S. Prosvirov	44.4677	38.1569	2016	A.S. Prosvirov
Harmonia quadripunctata (Pontoppidan, 1763)	Gelendzhik	Gelendzhik, Markotkh ridge, sweep netting, 13.5.2016	44.5989	38.0694	2016	A.O. Bieńkowski1 and M.J. Orlova-Bienkowskaja
Harmonia quadripunctata (Pontoppidan, 1763)	Gelendzhik	Gelendzhik, in the street, 12.5.2016	44.5611	38.0768	2016	A.O. Bieńkowski1 and M.J. Orlova-Bienkowskaja
Harmonia quadripunctata (Pontoppidan, 1763)	Sochi	Sochi, shaking of bushes in the evening, 9.6.2017	43.5855	39.7231	2017	A.O. Bieńkowski1 and M.J. Orlova-Bienkowskaja
Harmonia quadripunctata (Pontoppidan, 1763)	Gelendzhik	Gelendzhik, 30.4.2018	44.5611	38.0768	2018	E.A. Khachikov
Harmonia quadripunctata (Pontoppidan, 1763)	Sochi	Sochi, embarkment of the right bank of Sochi river, shaking of bushes and thuja, 15.5.2018	43.5959	39.7226	2018	A.O. Bieńkowski1 and M.J. Orlova-Bienkowskaja
Harmonia quadripunctata (Pontoppidan, 1763)	Sochi	Sochi, shaking of bushes in the evening, 24.4.2018	43.5855	39.7231	2018	A.O. Bieńkowski1 and M.J. Orlova-Bienkowskaja
Harmonia quadripunctata (Pontoppidan, 1763)	Sochi	Sochi, shaking of bushes in the evening, 3.5.2018	43.5855	39.7231	2018	A.O. Bieńkowski1 and M.J. Orlova-Bienkowskaja
Harmonia quadripunctata (Pontoppidan, 1763)	Sochi	Sochi, shaking of bushes, 24.4.2018	43.5855	39.7231	2018	A.O. Bieńkowski1 and M.J. Orlova-Bienkowskaja
Harmonia quadripunctata (Pontoppidan, 1763)	Sochi	Sochi, in the street, 22.4.2018	43.5855	39.7231	2018	A.O. Bieńkowski1 and M.J. Orlova-Bienkowskaja
Harmonia quadripunctata (Pontoppidan, 1763)	Sochi	Adler, Imeretinsky resort railway station, on thuja, 6.5.2018	43.4119	39.9743	2018	A.O. Bieńkowski1 and M.J. Orlova-Bienkowskaja
Harmonia quadripunctata (Pontoppidan, 1763)	Sochi	Adler, Veseloe, tangerine garden, shaking of bushes, 14.5.2018	43.4096	39.9842	2018	A.O. Bieńkowski1 and M.J. Orlova-Bienkowskaja
Harmonia quadripunctata (Pontoppidan, 1763)	Sochi	Adler, Moldovka, русло р. Мзымта, мертвый жук, 17.9.2020	43.4649	39.9752	2020	A.O. Bieńkowski1 and M.J. Orlova-Bienkowskaja
Hippodamia tredecimpunctata (Linnaeus, 1758)	Novorossijsk	Novorossijsk, Anapskoe Roadway, 7.1910	44.7343	37.7459	1910	[Bogdanov-Katjkov, 1916]
Hippodamia tredecimpunctata (Linnaeus, 1758)	Sochi	Lazarevskaya, Krasnodar region, 13.8.1952, Rudolf	43.9084	39.3334	1952	Zoological Institute, Russian Academy of Sciences
Hippodamia tredecimpunctata (Linnaeus, 1758)	Anapa	Anapa, 9.8.1982, B.A. Korotyaev	44.895	37.3162	1982	Zoological Institute, Russian Academy of Sciences
Hippodamia tredecimpunctata (Linnaeus, 1758)	Sochi	Sovkhoz "Russia", Adler district	43.3907	39.9848	1986	A.G. Koval
Hippodamia tredecimpunctata (Linnaeus, 1758)	Anapa	Anapa, Dzhemete, 3.8.1987, A.I. Prikhod’ko	44.9513	37.3237	1987	A.I. Prikhod’ko
Hippodamia tredecimpunctata (Linnaeus, 1758)	Anapa	Anapa, Dzhemete, sea shore, 3.8.1987	44.9495	37.3036	1987	A.O. Bieńkowski
Hippodamia tredecimpunctata (Linnaeus, 1758)	Anapa	Anapa, sand beach near the sea, sweep netting of Artheisia, 11.8.1990	44.895	37.3162	1990	A.O. Bieńkowski1 and M.J. Orlova-Bienkowskaja
Hippodamia variegata (Goeze, 1777)	Novorossijsk	Novorossijsk, Anapskoe Roadway, 1909	44.7343	37.7459	1909	[Bogdanov-Katjkov, 1916]
Hippodamia variegata (Goeze, 1777)	Anapa	Anapa, 7.1910	44.895	37.3162	1910	[Bogdanov-Katjkov, 1916]
Hippodamia variegata (Goeze, 1777)	Novorossijsk	Novorossijsk 8.6.1910	44.7239	37.769	1910	[Bogdanov-Katjkov, 1916]
Hippodamia variegata (Goeze, 1777)	Sochi	W. Caucasus, Krasnaya Polyana, 25.7.1911	43.68	40.2055	1911	Zoological Institute, Russian Academy of Sciences
Hippodamia variegata (Goeze, 1777)	Gelendzhik	Gelendzhik, Chernomorskaya Province, 1912 N. Vorob'ev	44.5611	38.0768	1912	Zoological Institute, Russian Academy of Sciences
Hippodamia variegata (Goeze, 1777)	Sochi	Sovkhoz "Russia", Adler district	43.3907	39.9848	1985	A.G. Koval
Hippodamia variegata (Goeze, 1777)	Sochi	Sovkhoz "Russia", Adler district	43.3907	39.9848	1986	A.G. Koval
Hippodamia variegata (Goeze, 1777)	Anapa	Anapa, Dzhemete, sea shore, 3.8.1987	44.9495	37.3036	1987	A.O. Bieńkowski
Hippodamia variegata (Goeze, 1777)	Anapa	Anapa, Dzhemete, thickets of Elaeagnus on the sand beach, sweep netting of grasses 1990	44.9495	37.3036	1990	A.O. Bieńkowski1 and M.J. Orlova-Bienkowskaja
Hippodamia variegata (Goeze, 1777)	Anapa	Anapa, cliff at the sea, sweep netting of grasses, 12.8.1990 and 17.8.1990	44.895	37.3162	1990	A.O. Bieńkowski1 and M.J. Orlova-Bienkowskaja
Hippodamia variegata (Goeze, 1777)	Anapa	Anapa, Dzhemete, near Chemburskoe Lake, on Salix, 11.8.1990	44.944	37.3216	1990	A.O. Bieńkowski1 and M.J. Orlova-Bienkowskaja
Hippodamia variegata (Goeze, 1777)	Anapa	Anapa, Dzhemete, sweep netting of ruderal plants, 10.8.1990	44.9513	37.3237	1990	A.O. Bieńkowski1 and M.J. Orlova-Bienkowskaja
Hippodamia variegata (Goeze, 1777)	Anapa	Anapa, Dzhemete, meadow, sweep netting, 11.8.1990 and 16.8.1990	44.9513	37.3237	1990	A.O. Bieńkowski1 and M.J. Orlova-Bienkowskaja
Hippodamia variegata (Goeze, 1777)	Gelendzhik	Gelendzhik district, 3 km north to Svetlyj, bank of the Aderba River, 19.09,2006	44.5504	38.1409	2006	personal communication by R.N. Ishin
Hippodamia variegata (Goeze, 1777)	Sochi	Sochi	43.5855	39.7231	2011	[Mokhrin. 2012]
Hippodamia variegata (Goeze, 1777)	Tuapsinskiy district	Tuapse, on lawns, sweep netting, 7.5.2013	44.0956	39.0736	2013	A.O. Bieńkowski1 and M.J. Orlova-Bienkowskaja
Hippodamia variegata (Goeze, 1777)	Sochi	Adler, Kurortnyj Gorodok, lawn, sweep netting, 11.5.2013	43.4681	39.8968	2013	A.O. Bieńkowski1 and M.J. Orlova-Bienkowskaja
Hippodamia variegata (Goeze, 1777)	Sochi	Adler, Mzymta river floodplain, 11.5.2013	43.4184	39.9243	2013	A.O. Bieńkowski1 and M.J. Orlova-Bienkowskaja
Hippodamia variegata (Goeze, 1777)	Sochi	Psou village, roadside, wasteland, sweep netting, 2.5.2013	43.3951	40.0082	2013	A.O. Bieńkowski1 and M.J. Orlova-Bienkowskaja
Hippodamia variegata (Goeze, 1777)	Sochi	Monastyr, sweep netting of grasses and bushes, 3.5.2013	43.5919	40.01	2013	A.O. Bieńkowski1 and M.J. Orlova-Bienkowskaja
Hippodamia variegata (Goeze, 1777)	Sochi	Rosa Khutor, floodplain of Mzymta River, on bushes, 3.5.2013	43.6717	40.2963	2013	A.O. Bieńkowski1 and M.J. Orlova-Bienkowskaja
Hippodamia variegata (Goeze, 1777)	Sochi	Adler, Imeretinskaya lowland, along the chanel, wasteland, sweep netting, 19.5.2016	43.41	39.9787	2016	A.O. Bieńkowski1 and M.J. Orlova-Bienkowskaja
Hippodamia variegata (Goeze, 1777)	Sochi	Adler, Olympic Village and Olympic Park, sweep netting, 8.6.2017	43.4062	39.9546	2017	A.O. Bieńkowski1 and M.J. Orlova-Bienkowskaja
Hippodamia variegata (Goeze, 1777)	Sochi	Adler, waste land near the railway station Imeretinskij Resort, 4.5.2018	43.4119	39.9743	2018	A.O. Bieńkowski1 and M.J. Orlova-Bienkowskaja
Hippodamia variegata (Goeze, 1777)	Tuapsinskiy district	Vicinity of Agoj-Shapsug, the bank of Agoj river, 29.6-2.7.2020, M.A. Lychak	44.1813	39.0685	2020	M.A. Lychak
Hippodamia variegata (Goeze, 1777)	Sochi	Adler, Moldovka, glade ЛЭП на холме, sweep netting, shaking of bushes, 17.9.2020	43.4579	39.9441	2020	A.O. Bieńkowski1 and M.J. Orlova-Bienkowskaja
Hippodamia variegata (Goeze, 1777)	Sochi	Adler, Moldovka, shaking of bushes at night, 18-19.9.2020	43.4551	39.9499	2020	A.O. Bieńkowski1 and M.J. Orlova-Bienkowskaja
Hippodamia variegata (Goeze, 1777)	Sochi	Adler, Moldovka,Pchelovodov street, sweep netting and shaking of bushes, 16.9.2020	43.455	39.95	2020	A.O. Bieńkowski1 and M.J. Orlova-Bienkowskaja
Hyperaspis campestris (Herbst, 1783)	Sochi	Sochi, 17.6.1946	43.5855	39.7231	1946	Zoological Institute, Russian Academy of Sciences
Hyperaspis campestris (Herbst, 1783)	Sochi	Sochi, 1947	43.5855	39.7231	1947	Zoological Institute, Russian Academy of Sciences
Hyperaspis campestris (Herbst, 1783)	Sochi	Krasnodar region, 3 km south to Lazarevskoe, experimental field of All-Russian Institute of Plant Protection, sweep netting, 5.8.1952, M. Nikol'skaya	43.8862	39.3649	1952	Zoological Institute, Russian Academy of Sciences
Hyperaspis campestris (Herbst, 1783)	Sochi	Verkhnij Jurt, 20.5.2008	43.6341	39.7701	2008	A.O. Bieńkowski1 and M.J. Orlova-Bienkowskaja
Hyperaspis campestris (Herbst, 1783)	Sochi	Chernomorskaya Province			~1900	[Jacobson, 1915]
Hyperaspis concolor Suffrian, 1843	Tuapsinskiy district	14 km south-east to Tuapse, Vishnevka, 10.9.1994, K. Tomkovitch	44.2386	38.9031	1994	All-Russian center for plant quarantine
Hyperaspis femorata Motschulsky, 1837	Anapa	Anapa, 30.6.1940, 18.7.1940, 22.6.1940	44.895	37.3162	1940	Zoological Institute, Russian Academy of Sciences
Hyperaspis femorata Motschulsky, 1837	Novorossijsk	Novorossijsk, 14.6.1946	44.7238	37.7688	1946	Zoological Institute, Russian Academy of Sciences
Hyperaspis femorata Motschulsky, 1837	Gelendzhik	Gelendzhik district, Markhotkh ridge, 26.6.1989, V.N. Prasolov	44.5989	38.0694	1989	Zoological Institute, Russian Academy of Sciences
Hyperaspis femorata Motschulsky, 1837	Gelendzhik	Gelendzhik, slope of Markotkh ridge, sweep netting, 13.5.2016	44.5989	38.0694	2016	A.O. Bieńkowski1 and M.J. Orlova-Bienkowskaja
Hyperaspis femorata Motschulsky, 1837	Anapa	Sukko, 3-4.06.2019	44.7913	37.4023	2019	E.A. Khachikov
Hyperaspis reppensis (Herbst, 1783)	Sochi	Sochi, 19.6.1946	43.5855	39.7231	1946	Zoological Institute, Russian Academy of Sciences
Hyperaspis reppensis (Herbst, 1783)	Sochi	Vicinity of Sochi, tea plantation, near Nol' Pass	43.7863	39.6546	2017	A.S. Bondarenko
Hyperaspis reppensis (Herbst, 1783)	Sochi	Vicinity of Sochi, tea plantation near Solokh-Aul	43.7989	39.6766	2017	A.S. Bondarenko
Lindorus lophanthae (Blaisdell, 1892)	Sochi	Sochi, old specimen, probably the 1950th Bogdanov	43.5855	39.7231	1950	All-Russian center for plant quarantine
Lindorus lophanthae (Blaisdell, 1892)	Sochi	Sochi, 17.5.2016	43.5855	39.7231	2016	A.O. Bieńkowski1 and M.J. Orlova-Bienkowskaja
Lindorus lophanthae (Blaisdell, 1892)	Sochi	Sochi, shaking of bushes in the evening, 13.6.2017	43.5855	39.7231	2017	A.O. Bieńkowski1 and M.J. Orlova-Bienkowskaja
Lindorus lophanthae (Blaisdell, 1892)	Sochi	Sochi, shaking of bushes in the evening, 9.5.2018	43.5855	39.7231	2018	A.O. Bieńkowski1 and M.J. Orlova-Bienkowskaja
Lindorus lophanthae (Blaisdell, 1892)	Sochi	Adler, waste land near the railway station Olympic Village, 4.5.2018	43.4177	39.9462	2018	A.O. Bieńkowski1 and M.J. Orlova-Bienkowskaja
Lindorus lophanthae (Blaisdell, 1892)	Sochi	Adler, on the beach, 18.9.2020	43.4464	39.9023	2020	A.O. Bieńkowski1 and M.J. Orlova-Bienkowskaja
Lindorus lophanthae (Blaisdell, 1892)	Sochi	Adler, near the airport and the railway station "Airport", shaking of bushes at night, 17-18.9.2020	43.4495	39.9409	2020	A.O. Bieńkowski1 and M.J. Orlova-Bienkowskaja
Myrrha octodecimguttata (Linnaeus, 1758)	Gelendzhik	Gelendzhik district, 3 km north to Svetlyj, bank of the Aderba River, 19.09,2006	44.5504	38.1409	2006	personal communication by R.N. Ishin
Myrrha octodecimguttata (Linnaeus, 1758)	Gelendzhik	Gelendzhik district, vicinity of Dzhankhot Ridge, 80-150 m a.s.l., 44˚28’03.9”N 38˚09’25.5”E 31.5-4.6.2016 A.S. Prosvirov	44.4677	38.1569	2016	A.S. Prosvirov
Myrrha octodecimguttata (Linnaeus, 1758)	Sochi	Sochi, shaking of bushes in the evening, 8.6.2017	43.5855	39.7231	2017	A.O. Bieńkowski1 and M.J. Orlova-Bienkowskaja
Myzia oblongoguttata (Linnaeus, 1758)	Sochi	Sochi, 1985, V.L. Filippov	43.5855	39.7231	1985	V.L. Filippov
Myzia oblongoguttata (Linnaeus, 1758)	Sochi	Sochi	43.5855	39.7231	2011	[Mokhrin. 2012]
Nephus bipunctatus (Kugelann, 1794)	Tuapsinskiy district	14 km south-east to Tuapse, Vishnevka, 10.9.1994, K. Tomkovitch	44.2386	38.9031	1994	All-Russian center for plant quarantine
Nephus bipunctatus (Kugelann, 1794)	Sochi	Razdolnoe, sweep netting of grasses, 24.5.2008	43.5834	39.7716	2008	A.O. Bieńkowski1 and M.J. Orlova-Bienkowskaja
Nephus bipunctatus (Kugelann, 1794)	Anapa	Vicinity of Malyj Utrish, biological station, 29.5-6.6.2013 A.S. Prosvirov	44.7094	37.4572	2013	A.S. Prosvirov
Nephus bipunctatus (Kugelann, 1794)	Novorossijsk	Vicinity of Abrau Lake, sweep netting, 8.5.2016	44.7003	37.5973	2016	A.O. Bieńkowski1 and M.J. Orlova-Bienkowskaja
Nephus bipunctatus (Kugelann, 1794)	Gelendzhik	Gelendzhik, Cape Tolsty, wasteland, sweep netting, 10.5.2016	44.5511	38.063	2016	A.O. Bieńkowski1 and M.J. Orlova-Bienkowskaja
Nephus bipunctatus (Kugelann, 1794)	Sochi	Adler, near the airport, waste land, road edges, sweep netting, 22.5.2016	43.4476	39.9392	2016	A.O. Bieńkowski1 and M.J. Orlova-Bienkowskaja
Nephus bipunctatus (Kugelann, 1794)	Sochi	Matsesta, sea shore, sweep netting, 12.6.2017	43.5444	39.7896	2017	A.O. Bieńkowski1 and M.J. Orlova-Bienkowskaja
Nephus bipunctatus (Kugelann, 1794)	Sochi	Adler, Moldovka, glade ЛЭП на холме, sweep netting, shaking of bushes, 17.9.2020	43.4579	39.9441	2020	A.O. Bieńkowski1 and M.J. Orlova-Bienkowskaja
Nephus bipunctatus (Kugelann, 1794)	Sochi	Adler, Moldovka, холм, травостойная ловушка на опушке леса, 16-26.9.2020	43.4579	39.9441	2020	A.O. Bieńkowski1 and M.J. Orlova-Bienkowskaja
Nephus bipunctatus (Kugelann, 1794)	Sochi	Adler, Moldovka, shaking of bushes at night, 16-17.9.2020	43.4551	39.9499	2020	A.O. Bieńkowski1 and M.J. Orlova-Bienkowskaja
Nephus bipunctatus (Kugelann, 1794)	Sochi	Adler, glade в лиственном лесу по хребту от СТ Высокое до СТ Дорожник, sweep netting and shaking of bushes, 23.9.2020	43.4976	39.9768	2020	A.O. Bieńkowski1 and M.J. Orlova-Bienkowskaja
Nephus quadrimaculatus (Herbst, 1783)	Anapa	Anapa, Dzhemete, meadow, sweep netting, 11.8.1990	44.9513	37.3237	1990	A.O. Bieńkowski1 and M.J. Orlova-Bienkowskaja
Nephus quadrimaculatus (Herbst, 1783)	Anapa	Vicinity of Anapa, Sukko, the meadow, sweep netting, 21.8.1990	44.7913	37.4023	1990	A.O. Bieńkowski1 and M.J. Orlova-Bienkowskaja
Nephus quadrimaculatus (Herbst, 1783)	Anapa	Vicinity of Malyj Utrish, Shirokaya, sweep netting of grasses in the meadow, 16.5.1995	44.7227	37.4525	1995	A.O. Bieńkowski1 and M.J. Orlova-Bienkowskaja
Nephus quadrimaculatus (Herbst, 1783)	Anapa	vicinity of Bolshoj Utrish, 15-30.8.2013, A.A. Dergalev	44.7609	37.3864	2013	All-Russian center for plant quarantine
Nephus quadrimaculatus (Herbst, 1783)	Sochi	Sochi, the hill near Fabritsiusa Street, forest edge, sweep netting, 30.4.2013	43.5795	39.7492	2013	A.O. Bieńkowski1 and M.J. Orlova-Bienkowskaja
Nephus quadrimaculatus (Herbst, 1783)	Sochi	Sochi, The Twentieth Mountain Rifle Division street, forest edge, sweep netting, 2.6.2017	43.5714	39.7573	2017	A.O. Bieńkowski1 and M.J. Orlova-Bienkowskaja
Nephus redtenbacheri (Mulsant, 1846)	Gelendzhik	Gelendzhik, 7-9.9.1979, B.A. Korotyaev	44.561	38.0771	1979	All-Russian center for plant quarantine
Nephus redtenbacheri (Mulsant, 1846)	Anapa	Anapa, Dzhemete, the meadow, sweep netting, 11.8.1990	44.9513	37.3237	1990	A.O. Bieńkowski1 and M.J. Orlova-Bienkowskaja
Nephus redtenbacheri (Mulsant, 1846)	Gelendzhik	Gelendzhik, Cape Tolsty, wasteland, sweep netting, 10.5.2016	44.5511	38.063	2016	A.O. Bieńkowski1 and M.J. Orlova-Bienkowskaja
Oenopia conglobata (Linnaeus, 1758)	Anapa	Anapa, the meadou on the cliff near the sea, sweep netting, 12.8.1990	44.895	37.3162	1990	A.O. Bieńkowski1 and M.J. Orlova-Bienkowskaja
Oenopia conglobata (Linnaeus, 1758)	Sochi	Adler, Kurortnyj Gorodok, the lawn, sweep netting, 11.5.2013	43.4681	39.8968	2013	A.O. Bieńkowski1 and M.J. Orlova-Bienkowskaja
Oenopia conglobata (Linnaeus, 1758)	Gelendzhik	Gelendzhik, in the street, 12.5.2016	44.5611	38.0768	2016	A.O. Bieńkowski1 and M.J. Orlova-Bienkowskaja
Oenopia conglobata (Linnaeus, 1758)	Sochi	Sochi, Arboretum, 21.5.2016	43.5718	39.7428	2016	A.O. Bieńkowski1 and M.J. Orlova-Bienkowskaja
Oenopia conglobata (Linnaeus, 1758)	Sochi	Sochi, shaking of bushes in the evening, 13.6.2017	43.5855	39.7231	2017	A.O. Bieńkowski1 and M.J. Orlova-Bienkowskaja
Oenopia conglobata (Linnaeus, 1758)	Sochi	Sochi, shaking of bushes in the evening, 21.4.2018	43.5855	39.7231	2018	A.O. Bieńkowski1 and M.J. Orlova-Bienkowskaja
Oenopia conglobata (Linnaeus, 1758)	Sochi	Sochi, shaking of bushes in the evening, 29.4.2018	43.5855	39.7231	2018	A.O. Bieńkowski1 and M.J. Orlova-Bienkowskaja
Oenopia conglobata (Linnaeus, 1758)	Sochi	Sochi, shaking of bushes in the evening, 3.5.2018	43.5855	39.7231	2018	A.O. Bieńkowski1 and M.J. Orlova-Bienkowskaja
Oenopia conglobata (Linnaeus, 1758)	Sochi	Sochi, shaking of bushes in the evening, 9.5.2018	43.5855	39.7231	2018	A.O. Bieńkowski1 and M.J. Orlova-Bienkowskaja
Oenopia conglobata (Linnaeus, 1758)	Sochi	Adler, Olympic Park, wasteland, 6.5.2018	43.4062	39.9546	2018	A.O. Bieńkowski1 and M.J. Orlova-Bienkowskaja
Oenopia impustulata (Linnaeus, 1767)	Sochi	W. Caucasus, 9.7.1959			1959	All-Russian center for plant quarantine
Oenopia impustulata (Linnaeus, 1767)	Sochi	Sochi, Krasnaya Polyana, 500 m a.s.l., 29.4.1992, A.G. Koval	43.68	40.2055	1992	Zoological Institute, Russian Academy of Sciences
Parexochomus melanocephalus (Zoubkoff, 1833)	Anapa	Anapa, meadow on the cliff near the sea, sweep netting, 12.8.1990 and 18.8.1990	44.8913	37.2968	1990	A.O. Bieńkowski1 and M.J. Orlova-Bienkowskaja
Parexochomus nigromaculatus (Goeze, 1777)	Anapa	Anapa, Varvarovka, 8.5.1970	44.8263	37.3675	1970	collection of S.M. Yablokov-Hnzoryan in Scientific Center of Zoology and Hydroecology, National Academy of Sciences of Armenia, Erevan, Armenia
Parexochomus nigromaculatus (Goeze, 1777)	Anapa	Anapa, Dzhemete, the meadow, sweep netting, 16.8.1990	44.9513	37.3237	1990	A.O. Bieńkowski1 and M.J. Orlova-Bienkowskaja
Parexochomus nigromaculatus (Goeze, 1777)	Anapa	Anapa, Dzhemete, the meadow: Arthemisia, Fabaceae, Polygonum, sweep netting, 15.8.1990	44.9513	37.3237	1990	A.O. Bieńkowski1 and M.J. Orlova-Bienkowskaja
Parexochomus nigromaculatus (Goeze, 1777)	Tuapsinskiy district	14 km south-east to Tuapse, Vishnevka, 10.9.1994, K. Tomkovitch	44.2386	38.9031	1994	All-Russian center for plant quarantine
Parexochomus nigromaculatus (Goeze, 1777)	Sochi	Vicinity of Loo, 17-26.09.2001 Smirnov	43.7047	39.5841	2001	M.E. Smirnov
Parexochomus nigromaculatus (Goeze, 1777)	Anapa	vicinity of Bolshoj Utrish, 15-30.8.2013, A.A. Dergalev	44.7609	37.3864	2013	All-Russian center for plant quarantine
Parexochomus nigromaculatus (Goeze, 1777)	Novorossijsk	Vicinity of Abrau Lake, sweep netting, 6.5.2016	44.7003	37.5973	2016	A.O. Bieńkowski1 and M.J. Orlova-Bienkowskaja
Parexochomus nigromaculatus (Goeze, 1777)	Sochi	Razdolnoe, floodplain of Bzugu River, meadow-wasteland, sweep netting, 6.6.2017	43.5834	39.7716	2017	A.O. Bieńkowski1 and M.J. Orlova-Bienkowskaja
Parexochomus nigromaculatus (Goeze, 1777)	Sochi	Adler, near Imeretinskij Resort railway station, 18.6.2017	43.4119	39.9743	2017	A.O. Bieńkowski1 and M.J. Orlova-Bienkowskaja
Parexochomus nigromaculatus (Goeze, 1777)	Anapa	Blagoveshchenskoe, 12.9.2018	45.0558	37.1318	2018	E.A. Khachikov
Parexochomus nigromaculatus (Goeze, 1777)	Anapa	Sukko, 10.9.2018	44.7913	37.4023	2018	E.A. Khachikov
Parexochomus nigromaculatus (Goeze, 1777)	Anapa	Sukko, 27-30.3.2018	44.7913	37.4023	2018	E.A. Khachikov
Parexochomus nigromaculatus (Goeze, 1777)	Sochi	Golovinka, Shakhe river floodplain sweep netting of grasses, 12.5.2018	43.7938	39.4688	2018	A.O. Bieńkowski1 and M.J. Orlova-Bienkowskaja
Parexochomus nigromaculatus (Goeze, 1777)	Sochi	Adler, Moldovka, glade ЛЭП на холме, sweep netting, shaking of bushes, 17.9.2020	43.4579	39.9441	2020	A.O. Bieńkowski1 and M.J. Orlova-Bienkowskaja
Parexochomus nigromaculatus (Goeze, 1777)	Sochi	Adler, Moldovka, холм, sweep netting, shaking of bushes, 19.9.2020	43.4579	39.9441	2020	A.O. Bieńkowski1 and M.J. Orlova-Bienkowskaja
Parexochomus nigromaculatus (Goeze, 1777)	Sochi	Adler, Moldovka, in the street, sweep netting and shaking of bushes, 17.9.2020	43.4551	39.9499	2020	A.O. Bieńkowski1 and M.J. Orlova-Bienkowskaja
Parexochomus nigromaculatus (Goeze, 1777)	Sochi	Adler, near the reilway station "Olimpic Park", wasteland, sweep netting, 24.9.2020 и 25.9.2020	43.4132	39.9695	2020	A.O. Bieńkowski1 and M.J. Orlova-Bienkowskaja
Parexochomus nigromaculatus (Goeze, 1777)	Sochi	Adler, Moldovka, floodplain of Mzymta river, sweep netting and shaking of bushes, 18.9.2020	43.4649	39.9752	2020	A.O. Bieńkowski1 and M.J. Orlova-Bienkowskaja
Parexochomus nigromaculatus (Goeze, 1777)	Sochi	Adler, Veseloe, tangerine garden, shaking of bushes, 24.9.2020	43.4096	39.9842	2020	A.O. Bieńkowski1 and M.J. Orlova-Bienkowskaja
Platynaspis luteorubra (Goeze, 1777)	Sochi	Caucas. occid., Utsch dere, 05-1888, Starck	43.6595	39.6271	1888	Zoological Institute, Russian Academy of Sciences
Platynaspis luteorubra (Goeze, 1777)	Gelendzhik	Gelendzhik, 24.7.1927, Luchnik	44.5611	38.0768	1927	Zoological Institute, Russian Academy of Sciences
Platynaspis luteorubra (Goeze, 1777)	Sochi	Sochi, 17.7.1927, I. Gudim	43.5855	39.7231	1927	Zoological Institute, Russian Academy of Sciences
Platynaspis luteorubra (Goeze, 1777)	Sochi	Lazarevskaya, Krasnodar region, 6, 13, 15.81952, Rudolf	43.9084	39.3334	1952	Zoological Institute, Russian Academy of Sciences
Platynaspis luteorubra (Goeze, 1777)	Gelendzhik	Gelendzhik, 7-9.9.1979, B.A. Korotyaev	44.5611	38.0768	1979	Zoological Institute, Russian Academy of Sciences
Platynaspis luteorubra (Goeze, 1777)	Sochi	Sochi, Lazarevskoe, the garden, 11.5.1987, Yu.V. Zayats	43.9084	39.3334	1987	Zoological Institute, Russian Academy of Sciences
Platynaspis luteorubra (Goeze, 1777)	Anapa	Anapa, Dzhemete, meadow, sweep netting, 13.8.1990	44.9513	37.3237	1990	A.O. Bieńkowski1 and M.J. Orlova-Bienkowskaja
Platynaspis luteorubra (Goeze, 1777)	Anapa	Anapa, Dzhemete, meadow, sweep netting, 13.8.1990	44.9513	37.3237	1990	A.O. Bieńkowski1 and M.J. Orlova-Bienkowskaja
Platynaspis luteorubra (Goeze, 1777)	Anapa	Vicinity of Malyj Utrish, Shirokaya, 200-400 m, meadows in the forest, sweep netting of grasses, 12.5.1995	44.7227	37.4525	1995	A.O. Bieńkowski1 and M.J. Orlova-Bienkowskaja
Platynaspis luteorubra (Goeze, 1777)	Anapa	Vicinity of Malyj Utrish, Shirokaya, 200-400 m a.s.l., meadows in the forest sweep netting of grasses, 12.5.1995	44.7094	37.4572	1995	A.O. Bieńkowski1 and M.J. Orlova-Bienkowskaja
Platynaspis luteorubra (Goeze, 1777)	Sochi	Adler, near the airport waste land and roadside, sweep netting, 22.5.2016	43.4476	39.9392	2016	A.O. Bieńkowski1 and M.J. Orlova-Bienkowskaja
Platynaspis luteorubra (Goeze, 1777)	Sochi	Adler, glade в лиственном лесу по хребту от СТ Высокое до СТ Дорожник, sweep netting and shaking of bushes, 23.9.2020	43.4976	39.9768	2020	A.O. Bieńkowski1 and M.J. Orlova-Bienkowskaja
Platynaspis luteorubra (Goeze, 1777)	Sochi	West-Caucas, Utsch-dere, E. Konig, collection by Rybakov	43.6595	39.6271	~1900	Zoological Institute, Russian Academy of Sciences
Propylea quatuordecimpunctata (Linnaeus, 1758)	Sochi	Kutshuk-Dere, 29.6.1901, Grinevetsk	43.6865	39.5972	1901	Zoological Institute, Russian Academy of Sciences
Propylea quatuordecimpunctata (Linnaeus, 1758)	Sochi	Adler, 15.6.1906, G. Sumakov	43.4382	39.9112	1906	Zoological Institute, Russian Academy of Sciences
Propylea quatuordecimpunctata (Linnaeus, 1758)	Sochi	Krasnaya Polyana, Black Sea Province, 5000-7000 feet above sea level, 28.5. and 8.6.1907, Kirichenko	43.68	40.2055	1907	Zoological Institute, Russian Academy of Sciences
Propylea quatuordecimpunctata (Linnaeus, 1758)	Anapa	Anapa, 6.1910	44.895	37.3162	1910	[Bogdanov-Katjkov, 1916]
Propylea quatuordecimpunctata (Linnaeus, 1758)	Novorossijsk	Novorossijsk 7.1910	44.7239	37.769	1910	[Bogdanov-Katjkov, 1916]
Propylea quatuordecimpunctata (Linnaeus, 1758)	Sochi	Caucasus, Adler, 23.6.1911	43.4476	39.9392	1911	Zoological Institute, Russian Academy of Sciences
Propylea quatuordecimpunctata (Linnaeus, 1758)	Gelendzhik	Gelendzhik, Chernomorskaya Province, N. Vorob'ev	44.5611	38.0768	1912	Zoological Institute, Russian Academy of Sciences
Propylea quatuordecimpunctata (Linnaeus, 1758)	Sochi	Sochi, 28.7.1927, I. Gudim	43.5855	39.7231	1927	Zoological Institute, Russian Academy of Sciences
Propylea quatuordecimpunctata (Linnaeus, 1758)	Sochi	Caucas. occ., Sotshi, 8.6.1928, Baeckmann	43.5855	39.7231	1928	Zoological Institute, Russian Academy of Sciences
Propylea quatuordecimpunctata (Linnaeus, 1758)	Sochi	Sochi, Fabritsius, 1.8.1950, Rubtsov	43.5795	39.7492	1950	Zoological Institute, Russian Academy of Sciences
Propylea quatuordecimpunctata (Linnaeus, 1758)	Sochi	Lazarevskaya, Krasnodar region, 14 and 20.8.1952, Rudolf	43.9084	39.3334	1952	Zoological Institute, Russian Academy of Sciences
Propylea quatuordecimpunctata (Linnaeus, 1758)	Sochi	Krasnodar region, Sochi, Arboretum, Lysaya Gora, 27.8.1952, V. Rudolf	43.5718	39.7428	1952	Zoological Institute, Russian Academy of Sciences
Propylea quatuordecimpunctata (Linnaeus, 1758)	Gelendzhik	Dzhankhot, SO Gelendzhik, pine forest, Pinus pithiusa, 23 and 30.5.1956, Bej-Bienko	44.4677	38.1569	1956	Zoological Institute, Russian Academy of Sciences
Propylea quatuordecimpunctata (Linnaeus, 1758)	Sochi	Sochi, 12.6.1957, Garnovskaya	43.5855	39.7231	1957	Zoological Institute, Russian Academy of Sciences
Propylea quatuordecimpunctata (Linnaeus, 1758)	Sochi	Vicinity of Sochi, 1-15.6.1971 and 19.6.1971, A.L. Lobanov	43.5855	39.7231	1971	Zoological Institute, Russian Academy of Sciences
Propylea quatuordecimpunctata (Linnaeus, 1758)	Sochi	W. Caucasus, vicinity of Sochi, Golovinka, obergin field, 26.7.1984, V. Prasolov	43.7938	39.4688	1984	Zoological Institute, Russian Academy of Sciences
Propylea quatuordecimpunctata (Linnaeus, 1758)	Sochi	Sovkhoz "Russia"	43.3907	39.9848	1985	A.G. Koval
Propylea quatuordecimpunctata (Linnaeus, 1758)	Sochi	Sochi, Arboretum, 20.6.1986, O.B. Bienkowski	43.5718	39.7428	1986	O.B. Bieńkowski
Propylea quatuordecimpunctata (Linnaeus, 1758)	Anapa	Anapa, Dzhemete, sea shore, 3.8.1987	44.9495	37.3036	1987	A.O. Bieńkowski
Propylea quatuordecimpunctata (Linnaeus, 1758)	Sochi	Sochi, 1987, 1989, V.L. Filippov	43.5855	39.7231	1987	V.L. Filippov
Propylea quatuordecimpunctata (Linnaeus, 1758)	Sochi	Sochi, 1987, 1989, V.L. Filippov	43.5855	39.7231	1989	V.L. Filippov
Propylea quatuordecimpunctata (Linnaeus, 1758)	Anapa	Anapa, meadow on the cliff near the sea, sweep netting, 12.8.1990	44.895	37.3162	1990	A.O. Bieńkowski1 and M.J. Orlova-Bienkowskaja
Propylea quatuordecimpunctata (Linnaeus, 1758)	Anapa	Anapa, meadow on the cliff near the sea,, sweep netting, 17.8.1990	44.895	37.3162	1990	A.O. Bieńkowski1 and M.J. Orlova-Bienkowskaja
Propylea quatuordecimpunctata (Linnaeus, 1758)	Gelendzhik	Vicinity of Gelendzhik, near Aderbievka, beech forest, sweep netting on grasses, 2.9.1990	44.6071	38.1023	1990	A.O. Bieńkowski1 and M.J. Orlova-Bienkowskaja
Propylea quatuordecimpunctata (Linnaeus, 1758)	Anapa	Vicinity of Malyj Utrish, Shirokaya, 16.5.1995	44.7227	37.4525	1995	A.O. Bieńkowski1 and M.J. Orlova-Bienkowskaja
Propylea quatuordecimpunctata (Linnaeus, 1758)	Anapa	Vicinity of Malyj Utrish, biological station, 6.5.1995	44.7094	37.4572	1995	A.O. Bieńkowski1 and M.J. Orlova-Bienkowskaja
Propylea quatuordecimpunctata (Linnaeus, 1758)	Gelendzhik	Pshada, sweep netting, 16.5.2008, A.S. Ukrainskij	44.4706	38.4014	2008	All-Russian center for plant quarantine
Propylea quatuordecimpunctata (Linnaeus, 1758)	Sochi	Verkhnij Jurt, sweep netting of grasses and bushes, 20.5.2008	43.6341	39.7701	2008	A.O. Bieńkowski1 and M.J. Orlova-Bienkowskaja
Propylea quatuordecimpunctata (Linnaeus, 1758)	Sochi	Razdolnoe, sweep netting of grasses at the forest edge, 19.5.2008	43.5834	39.7716	2008	A.O. Bieńkowski1 and M.J. Orlova-Bienkowskaja
Propylea quatuordecimpunctata (Linnaeus, 1758)	Sochi	Razdolnoe, meadow, 30.5.2008	43.5834	39.7716	2008	A.O. Bieńkowski1 and M.J. Orlova-Bienkowskaja
Propylea quatuordecimpunctata (Linnaeus, 1758)	Sochi	Sochi	43.5855	39.7231	2011	[Mokhrin. 2012]
Propylea quatuordecimpunctata (Linnaeus, 1758)	Tuapsinskiy district	Tuapse, on the lawns, sweep netting, 7.5.2013	44.0956	39.0736	2013	A.O. Bieńkowski1 and M.J. Orlova-Bienkowskaja
Propylea quatuordecimpunctata (Linnaeus, 1758)	Sochi	Sochi, the hill near Fabritsiusa Street, edge of deciduous forest, sweep netting, 30.4.2013	43.5795	39.7492	2013	A.O. Bieńkowski1 and M.J. Orlova-Bienkowskaja
Propylea quatuordecimpunctata (Linnaeus, 1758)	Sochi	Sochi, The Twentieth Mountain Rifle Division Street, 30.4.2013	43.5714	39.7573	2013	A.O. Bieńkowski1 and M.J. Orlova-Bienkowskaja
Propylea quatuordecimpunctata (Linnaeus, 1758)	Sochi	Razdolnoe, floodplain of the river, sweep netting, 1.5.2013	43.5834	39.7716	2013	A.O. Bieńkowski1 and M.J. Orlova-Bienkowskaja
Propylea quatuordecimpunctata (Linnaeus, 1758)	Sochi	Sochi, Razdolnoe, the hill, the edge of the deciduous forest, sweep netting, 1.5.2013	43.5834	39.7716	2013	A.O. Bieńkowski1 and M.J. Orlova-Bienkowskaja
Propylea quatuordecimpunctata (Linnaeus, 1758)	Sochi	Semenovka, sweep netting of grasses and bushes along the roadside in the deciduous forest, 6.5.2013	43.6419	39.8502	2013	A.O. Bieńkowski1 and M.J. Orlova-Bienkowskaja
Propylea quatuordecimpunctata (Linnaeus, 1758)	Sochi	Psou, wasteland, sweep netting, 2.5.2013	43.3951	40.0082	2013	A.O. Bieńkowski1 and M.J. Orlova-Bienkowskaja
Propylea quatuordecimpunctata (Linnaeus, 1758)	Sochi	Psou village, roadside, wasteland, sweep netting, 2.5.2013	43.3951	40.0082	2013	A.O. Bieńkowski1 and M.J. Orlova-Bienkowskaja
Propylea quatuordecimpunctata (Linnaeus, 1758)	Sochi	Monastyr, sweep netting of grasses and bushes, 3.5.2013	43.5919	40.01	2013	A.O. Bieńkowski1 and M.J. Orlova-Bienkowskaja
Propylea quatuordecimpunctata (Linnaeus, 1758)	Sochi	Rosa Khutor, floodplain of Mzymta River, on bushes, 3.5.2013	43.6717	40.2963	2013	A.O. Bieńkowski1 and M.J. Orlova-Bienkowskaja
Propylea quatuordecimpunctata (Linnaeus, 1758)	Anapa	Vicinity of Malyj Utrish, ash forest, sweep netting on grasses, 5.5.2016	44.7094	37.4572	2016	A.O. Bieńkowski1 and M.J. Orlova-Bienkowskaja
Propylea quatuordecimpunctata (Linnaeus, 1758)	Anapa	Vicinity of Malyj Utrish, Lobanova Shchel, floodplain of the stream, sweep netting and shaking of bushes, 6.5.2016	44.7095	37.4755	2016	A.O. Bieńkowski1 and M.J. Orlova-Bienkowskaja
Propylea quatuordecimpunctata (Linnaeus, 1758)	Novorossijsk	Vicinity of Abrau Lake, sweep netting, 8.5.2016	44.7003	37.5973	2016	A.O. Bieńkowski1 and M.J. Orlova-Bienkowskaja
Propylea quatuordecimpunctata (Linnaeus, 1758)	Novorossijsk	Vicinity of Abrau Lake, sweep netting, 8.5.2016	44.7003	37.5973	2016	A.O. Bieńkowski1 and M.J. Orlova-Bienkowskaja
Propylea quatuordecimpunctata (Linnaeus, 1758)	Gelendzhik	Gelendzhik, in the street, 12.5.2016	44.5611	38.0768	2016	A.O. Bieńkowski1 and M.J. Orlova-Bienkowskaja
Propylea quatuordecimpunctata (Linnaeus, 1758)	Sochi	Gornyj Vozdukh railway station, sweep netting of grasses and bushes, 20.5.2016	43.6801	39.6	2016	A.O. Bieńkowski1 and M.J. Orlova-Bienkowskaja
Propylea quatuordecimpunctata (Linnaeus, 1758)	Sochi	Gornyj Vozdukh railway station, sweep netting of grasses, 19.5.2016	43.6801	39.6	2016	A.O. Bieńkowski1 and M.J. Orlova-Bienkowskaja
Propylea quatuordecimpunctata (Linnaeus, 1758)	Sochi	Lower Uch-Dere, sweep netting, 20.5.2016	43.6595	39.6271	2016	A.O. Bieńkowski1 and M.J. Orlova-Bienkowskaja
Propylea quatuordecimpunctata (Linnaeus, 1758)	Sochi	Sochi, 17.5.2016	43.5855	39.7231	2016	A.O. Bieńkowski1 and M.J. Orlova-Bienkowskaja
Propylea quatuordecimpunctata (Linnaeus, 1758)	Sochi	Sochi, forest edge, sweep netting, 18.5.2016	43.5855	39.7231	2016	A.O. Bieńkowski1 and M.J. Orlova-Bienkowskaja
Propylea quatuordecimpunctata (Linnaeus, 1758)	Sochi	Sochi, in the street, sweep netting, 18.5.2016	43.5855	39.7231	2016	A.O. Bieńkowski1 and M.J. Orlova-Bienkowskaja
Propylea quatuordecimpunctata (Linnaeus, 1758)	Sochi	Sochi, Fabritsiusa Street, wasteland, sweep netting, 23.5.2016	43.5795	39.7492	2016	A.O. Bieńkowski1 and M.J. Orlova-Bienkowskaja
Propylea quatuordecimpunctata (Linnaeus, 1758)	Sochi	Adler, near the airport waste land and roadside, sweep netting, 22.5.2016	43.4476	39.9392	2016	A.O. Bieńkowski1 and M.J. Orlova-Bienkowskaja
Propylea quatuordecimpunctata (Linnaeus, 1758)	Sochi	Adler, Imeretinskaya lowland, wasteland along the chanel and railway, sweep netting on grasses, 19.5.2016	43.41	39.9787	2016	A.O. Bieńkowski1 and M.J. Orlova-Bienkowskaja
Propylea quatuordecimpunctata (Linnaeus, 1758)	Sochi	Adler, Imeretinskaya lowland, lawn, sweep netting, 19.5.2016	43.41	39.9787	2016	A.O. Bieńkowski1 and M.J. Orlova-Bienkowskaja
Propylea quatuordecimpunctata (Linnaeus, 1758)	Sochi	Adler, bank of Psou River, sweep netting, 22.5.2016	43.3951	40.0082	2016	A.O. Bieńkowski1 and M.J. Orlova-Bienkowskaja
Propylea quatuordecimpunctata (Linnaeus, 1758)	Gelendzhik	Gelendzhik, vicinity of Marjina Roshcha, vineyard	44.6191	38.0293	2017	A.S. Bondarenko
Propylea quatuordecimpunctata (Linnaeus, 1758)	Sochi	Vicinity of Sochi, tea plantation, near Nol' Pass	43.7863	39.6546	2017	A.S. Bondarenko
Propylea quatuordecimpunctata (Linnaeus, 1758)	Sochi	Vicinity of Sochi, tea plantation near Solokh-Aul	43.7989	39.6766	2017	A.S. Bondarenko
Propylea quatuordecimpunctata (Linnaeus, 1758)	Sochi	Sochi, the floodplain at the right bank of Sochi river, sweep netting, 10.6.2017	43.5959	39.7226	2017	A.O. Bieńkowski1 and M.J. Orlova-Bienkowskaja
Propylea quatuordecimpunctata (Linnaeus, 1758)	Sochi	Sochi, shaking of bushes in the evening, 10.6.2017	43.5855	39.7231	2017	A.O. Bieńkowski1 and M.J. Orlova-Bienkowskaja
Propylea quatuordecimpunctata (Linnaeus, 1758)	Sochi	Sochi, shaking of bushes in the evening, 13.6.2017	43.5855	39.7231	2017	A.O. Bieńkowski1 and M.J. Orlova-Bienkowskaja
Propylea quatuordecimpunctata (Linnaeus, 1758)	Sochi	Sochi, Fabritsiusa Street, wasteland, sweep netting, 7.6.2017	43.5795	39.7492	2017	A.O. Bieńkowski1 and M.J. Orlova-Bienkowskaja
Propylea quatuordecimpunctata (Linnaeus, 1758)	Sochi	Sochi, The Twentieth Mountain Rifle Division Street, fofest edge, sweep netting, 2.6.2017	43.5714	39.7573	2017	A.O. Bieńkowski1 and M.J. Orlova-Bienkowskaja
Propylea quatuordecimpunctata (Linnaeus, 1758)	Sochi	Razdolnoe, floodplain of Mzymta River, meadow-wasteland, sweep netting, 6.6.2017	43.5834	39.7716	2017	A.O. Bieńkowski1 and M.J. Orlova-Bienkowskaja
Propylea quatuordecimpunctata (Linnaeus, 1758)	Sochi	Matsesta, sea shore, the meadow, sweep netting, 12.6.2017	43.5444	39.7896	2017	A.O. Bieńkowski1 and M.J. Orlova-Bienkowskaja
Propylea quatuordecimpunctata (Linnaeus, 1758)	Sochi	Matsesta, waste land and lawn near the rail way station, sweep netting, 12.6.2017	43.5444	39.7896	2017	A.O. Bieńkowski1 and M.J. Orlova-Bienkowskaja
Propylea quatuordecimpunctata (Linnaeus, 1758)	Sochi	Matsesta, waste land, the lawn, sweep netting, 12.6.2017	43.5444	39.7896	2017	A.O. Bieńkowski1 and M.J. Orlova-Bienkowskaja
Propylea quatuordecimpunctata (Linnaeus, 1758)	Sochi	Adler, "Southern cultures" Park, sweep netting, 17.6.2017	43.4187	39.9383	2017	A.O. Bieńkowski1 and M.J. Orlova-Bienkowskaja
Propylea quatuordecimpunctata (Linnaeus, 1758)	Sochi	Adler, Olympic Village and Olympic Park, the lawn, sweep netting, 8.6.2017	43.4062	39.9546	2017	A.O. Bieńkowski1 and M.J. Orlova-Bienkowskaja
Propylea quatuordecimpunctata (Linnaeus, 1758)	Sochi	Adler, Imeretinskij Resort, bank of the pond, sweep netting, 3.6.2017	43.4119	39.9743	2017	A.O. Bieńkowski1 and M.J. Orlova-Bienkowskaja
Propylea quatuordecimpunctata (Linnaeus, 1758)	Sochi	Adler, Imeretinskij Resort, waste land, sweep netting at night, 15.6.2017	43.4119	39.9743	2017	A.O. Bieńkowski1 and M.J. Orlova-Bienkowskaja
Propylea quatuordecimpunctata (Linnaeus, 1758)	Sochi	Adler, Imeretinskaya lowland, bank of the pond, sweep netting, 11.6.2017	43.41	39.9787	2017	A.O. Bieńkowski1 and M.J. Orlova-Bienkowskaja
Propylea quatuordecimpunctata (Linnaeus, 1758)	Sochi	Adler, Imeretinskaya lowland, bank of the pond, sweep netting, 17.6.2017	43.41	39.9787	2017	A.O. Bieńkowski1 and M.J. Orlova-Bienkowskaja
Propylea quatuordecimpunctata (Linnaeus, 1758)	Sochi	Adler, Imeretinskaya lowland, waste land, sweep netting, 11.6.2017	43.41	39.9787	2017	A.O. Bieńkowski1 and M.J. Orlova-Bienkowskaja
Propylea quatuordecimpunctata (Linnaeus, 1758)	Sochi	Adler, Imeretinskaya lowland, wasteland along the chanel and railway, sweep netting on grasses, 11.6.2017	43.41	39.9787	2017	A.O. Bieńkowski1 and M.J. Orlova-Bienkowskaja
Propylea quatuordecimpunctata (Linnaeus, 1758)	Sochi	Adler, Imeretinskaya lowland, wasteland, sweep netting, 16.6.2017	43.41	39.9787	2017	A.O. Bieńkowski1 and M.J. Orlova-Bienkowskaja
Propylea quatuordecimpunctata (Linnaeus, 1758)	Anapa	Sukko, 26-30.04.2018	44.7913	37.4023	2018	E.A. Khachikov
Propylea quatuordecimpunctata (Linnaeus, 1758)	Sochi	Veseloe, 2.11.2018	43.4175	40.0074	2018	E.A. Khachikov
Propylea quatuordecimpunctata (Linnaeus, 1758)	Sochi	Golovinka, Shakhe river floodplain, sweep netting of grasses and bushes, 12.5.2018	43.7938	39.4688	2018	A.O. Bieńkowski1 and M.J. Orlova-Bienkowskaja
Propylea quatuordecimpunctata (Linnaeus, 1758)	Sochi	Sochi, Mamajsjij Forestpark, 21.4.2018	43.6274	39.7088	2018	A.O. Bieńkowski1 and M.J. Orlova-Bienkowskaja
Propylea quatuordecimpunctata (Linnaeus, 1758)	Sochi	Sochi, Mamajsjij Forestpark, sweep netting of grasses, 21.4.2018	43.6274	39.7088	2018	A.O. Bieńkowski1 and M.J. Orlova-Bienkowskaja
Propylea quatuordecimpunctata (Linnaeus, 1758)	Sochi	Sochi, the floodplain of Sochi river, sweep netting of grasses, 22.4.2018	43.5959	39.7226	2018	A.O. Bieńkowski1 and M.J. Orlova-Bienkowskaja
Propylea quatuordecimpunctata (Linnaeus, 1758)	Sochi	Sochi, 1.5.2018	43.5855	39.7231	2018	A.O. Bieńkowski1 and M.J. Orlova-Bienkowskaja
Propylea quatuordecimpunctata (Linnaeus, 1758)	Sochi	Sochi, 27.4.2018	43.5855	39.7231	2018	A.O. Bieńkowski1 and M.J. Orlova-Bienkowskaja
Propylea quatuordecimpunctata (Linnaeus, 1758)	Sochi	Sochi, shaking of bushes in the evening, 10.5.2018	43.5855	39.7231	2018	A.O. Bieńkowski1 and M.J. Orlova-Bienkowskaja
Propylea quatuordecimpunctata (Linnaeus, 1758)	Sochi	Sochi, shaking of bushes in the evening, 29.4.2018	43.5855	39.7231	2018	A.O. Bieńkowski1 and M.J. Orlova-Bienkowskaja
Propylea quatuordecimpunctata (Linnaeus, 1758)	Sochi	Sochi, shaking of bushes in the evening, 9.5.2018	43.5855	39.7231	2018	A.O. Bieńkowski1 and M.J. Orlova-Bienkowskaja
Propylea quatuordecimpunctata (Linnaeus, 1758)	Sochi	Sochi, shaking of bushes, 24.4.2018	43.5855	39.7231	2018	A.O. Bieńkowski1 and M.J. Orlova-Bienkowskaja
Propylea quatuordecimpunctata (Linnaeus, 1758)	Sochi	Sochi, bushes, 8.5.2018	43.5855	39.7231	2018	A.O. Bieńkowski1 and M.J. Orlova-Bienkowskaja
Propylea quatuordecimpunctata (Linnaeus, 1758)	Sochi	Sochi, Seafront, shaking of bushes in the evening, 1.5.2018	43.5736	39.7269	2018	A.O. Bieńkowski1 and M.J. Orlova-Bienkowskaja
Propylea quatuordecimpunctata (Linnaeus, 1758)	Sochi	Razbityj Kotel, forest and meadows on the hill, sweep netting, 30.4.2018	43.6854	39.7287	2018	A.O. Bieńkowski1 and M.J. Orlova-Bienkowskaja
Propylea quatuordecimpunctata (Linnaeus, 1758)	Sochi	Sochi, the floodplain at the right bank of Sochi river upstream the Podgornaya street, sweep netting, 27.4.2018	43.6187	39.7322	2018	A.O. Bieńkowski1 and M.J. Orlova-Bienkowskaja
Propylea quatuordecimpunctata (Linnaeus, 1758)	Sochi	Sochi, Podgornaya street, shaking of bushes: Rosa, Spirea, Hybiskus, 27.4.2018	43.6187	39.7322	2018	A.O. Bieńkowski1 and M.J. Orlova-Bienkowskaja
Propylea quatuordecimpunctata (Linnaeus, 1758)	Sochi	Plastunka, deciduous forest on the mountain slope, forest edge, sweep netting, 9.5.2018	43.6825	39.761	2018	A.O. Bieńkowski1 and M.J. Orlova-Bienkowskaja
Propylea quatuordecimpunctata (Linnaeus, 1758)	Sochi	Plastunka, sweep netting of grasses near the pond, 9.5.2018	43.6825	39.761	2018	A.O. Bieńkowski1 and M.J. Orlova-Bienkowskaja
Propylea quatuordecimpunctata (Linnaeus, 1758)	Sochi	Sochi, the upper reaches of Bzugu River, forest, sweep netting, 5.5.2018	43.6041	39.7641	2018	A.O. Bieńkowski1 and M.J. Orlova-Bienkowskaja
Propylea quatuordecimpunctata (Linnaeus, 1758)	Sochi	Sochi, garden community "Persik", wasteland, sweep netting, 5.5.2018	43.6265	39.7703	2018	A.O. Bieńkowski1 and M.J. Orlova-Bienkowskaja
Propylea quatuordecimpunctata (Linnaeus, 1758)	Sochi	Matsesta, Agur River floodplain, sweep netting, 28.4.2018	43.5444	39.7896	2018	A.O. Bieńkowski1 and M.J. Orlova-Bienkowskaja
Propylea quatuordecimpunctata (Linnaeus, 1758)	Sochi	Izmajlovka, Zmejka river floodplain, sweep netting of grasses, 23.4.2018	43.6558	39.8125	2018	A.O. Bieńkowski1 and M.J. Orlova-Bienkowskaja
Propylea quatuordecimpunctata (Linnaeus, 1758)	Sochi	Adler, near Olympic Village railway station, waste land, sweep netting, 4.5.2018	43.4177	39.9462	2018	A.O. Bieńkowski1 and M.J. Orlova-Bienkowskaja
Propylea quatuordecimpunctata (Linnaeus, 1758)	Sochi	Adler, near Olympic Village railway station, waste land, sweep netting, 4.5.2018	43.4177	39.9462	2018	A.O. Bieńkowski1 and M.J. Orlova-Bienkowskaja
Propylea quatuordecimpunctata (Linnaeus, 1758)	Sochi	Adler, Olympic Village, bank of the pond, sweep netting, 4.5.2018	43.4177	39.9462	2018	A.O. Bieńkowski1 and M.J. Orlova-Bienkowskaja
Propylea quatuordecimpunctata (Linnaeus, 1758)	Sochi	Adler, near Imeretinskij Resort railway station, waste land near the chanel, sweep netting, 4.5.2018	43.4119	39.9743	2018	A.O. Bieńkowski1 and M.J. Orlova-Bienkowskaja
Propylea quatuordecimpunctata (Linnaeus, 1758)	Sochi	Adler, near Imeretinskij Resort railway station, waste land, sweep netting, 6.5.2018	43.4119	39.9743	2018	A.O. Bieńkowski1 and M.J. Orlova-Bienkowskaja
Propylea quatuordecimpunctata (Linnaeus, 1758)	Sochi	Adler, Veseloe, tangerine garden, 43.409272 N, 39.984822 E, shaking of branches of tangerine trees, 14.5.2018	43.4096	39.9842	2018	A.O. Bieńkowski1 and M.J. Orlova-Bienkowskaja
Propylea quatuordecimpunctata (Linnaeus, 1758)	Tuapsinskiy district	Vicinity of Nebug, the bank of Nebug river, 29.6-2.7.2020, M.A. Lychak	44.1711	39.0021	2020	M.A. Lychak
Propylea quatuordecimpunctata (Linnaeus, 1758)	Sochi	Adler, Moldovka, холм, shaking of bushes, 19.9.2020	43.4579	39.9441	2020	A.O. Bieńkowski1 and M.J. Orlova-Bienkowskaja
Propylea quatuordecimpunctata (Linnaeus, 1758)	Sochi	Adler, Moldovka, shaking of bushes at night 18-19.9.2020	43.4551	39.9499	2020	A.O. Bieńkowski1 and M.J. Orlova-Bienkowskaja
Propylea quatuordecimpunctata (Linnaeus, 1758)	Sochi	Adler, Moldovka,Pchelovodov street, sweep netting and shaking of bushes, 16.9.2020	43.455	39.95	2020	A.O. Bieńkowski1 and M.J. Orlova-Bienkowskaja
Propylea quatuordecimpunctata (Linnaeus, 1758)	Sochi	Adler, Moldovka,Pchelovodov street, sweep netting and shaking of bushes at night, 16-17.9.2020	43.455	39.95	2020	A.O. Bieńkowski1 and M.J. Orlova-Bienkowskaja
Propylea quatuordecimpunctata (Linnaeus, 1758)	Sochi	Adler, near the reilway station "Olimpic Park", wasteland, sweep netting, 24.9.2020 и 25.9.2020	43.4132	39.9695	2020	A.O. Bieńkowski1 and M.J. Orlova-Bienkowskaja
Propylea quatuordecimpunctata (Linnaeus, 1758)	Sochi	Adler,Moldovka, floodplain of Mzymta river, sweep netting and shaking of bushes, 18.9.2020	43.4649	39.9752	2020	A.O. Bieńkowski1 and M.J. Orlova-Bienkowskaja
Propylea quatuordecimpunctata (Linnaeus, 1758)	Sochi	Adler, Moldovka, floodplain of Mzymta river, sweep netting and shaking of bushes, 17.9.2020	43.4649	39.9752	2020	A.O. Bieńkowski1 and M.J. Orlova-Bienkowskaja
Propylea quatuordecimpunctata (Linnaeus, 1758)	Sochi	Adler, Moldovka, floodplain of Mzymta river, sweep netting and shaking of bushes, 18.9.2020	43.4649	39.9752	2020	A.O. Bieńkowski1 and M.J. Orlova-Bienkowskaja
Propylea quatuordecimpunctata (Linnaeus, 1758)	Sochi	Adler, СТ Высокое, сорняки и сад, sweep netting, 20.9.2020	43.4976	39.9768	2020	A.O. Bieńkowski1 and M.J. Orlova-Bienkowskaja
Propylea quatuordecimpunctata (Linnaeus, 1758)	Sochi	Adler, СТ Высокое, берег пруда, sweep netting, 20.9.2020	43.4976	39.9768	2020	A.O. Bieńkowski1 and M.J. Orlova-Bienkowskaja
Propylea quatuordecimpunctata (Linnaeus, 1758)	Sochi	Adler, glade по хребту от СТ Высокое до СТ Дорожник, sweep netting and shaking of bushes, 23.9.2020	43.4976	39.9768	2020	A.O. Bieńkowski1 and M.J. Orlova-Bienkowskaja
Propylea quatuordecimpunctata (Linnaeus, 1758)	Sochi	Adler, deciduous forest по дороге близ СТ Высокое, sweep netting and shaking of bushes, 20.9.2020	43.4976	39.9768	2020	A.O. Bieńkowski1 and M.J. Orlova-Bienkowskaja
Psyllobora vigintiduopunctata (Linnaeus, 1758)	Sochi	Caucasus occ., Krasnaja Polana, 05-1907, Kiritschenko	43.68	40.2055	1907	Zoological Institute, Russian Academy of Sciences
Psyllobora vigintiduopunctata (Linnaeus, 1758)	Sochi	Adler, 11.6.1909, G. Sumakov	43.4476	39.9392	1909	Zoological Institute, Russian Academy of Sciences
Psyllobora vigintiduopunctata (Linnaeus, 1758)	Anapa	Anapa, 7.1910	44.895	37.3162	1910	[Bogdanov-Katjkov, 1916]
Psyllobora vigintiduopunctata (Linnaeus, 1758)	Novorossijsk	Tonnelnaya 6.1912	44.8373	37.6544	1912	[Bogdanov-Katjkov, 1916]
Psyllobora vigintiduopunctata (Linnaeus, 1758)	Novorossijsk	Novorossijsk, Anapskoe Roadway, 6.1912	44.7343	37.7459	1912	[Bogdanov-Katjkov, 1916]
Psyllobora vigintiduopunctata (Linnaeus, 1758)	Gelendzhik	Gelendzhik, Chernomorskaya Province, N. Vorob'ev	44.5611	38.0768	1912	Zoological Institute, Russian Academy of Sciences
Psyllobora vigintiduopunctata (Linnaeus, 1758)	Tuapsinskiy district	Tuapse, 1917	44.0946	39.0731	1917	Zoological Institute, Russian Academy of Sciences
Psyllobora vigintiduopunctata (Linnaeus, 1758)	Sochi	Sochi, 19.7.1927, I. Gudim	43.5855	39.7231	1927	Zoological Institute, Russian Academy of Sciences
Psyllobora vigintiduopunctata (Linnaeus, 1758)	Sochi	Caucas. occ., Sotshi, 8.6.1928, Baeckmann	43.5846	39.7235	1928	Zoological Institute, Russian Academy of Sciences
Psyllobora vigintiduopunctata (Linnaeus, 1758)	Sochi	Lazarevskaya, Krasnodar region, 6.8.1952, Rudolf	43.9084	39.3334	1952	Zoological Institute, Russian Academy of Sciences
Psyllobora vigintiduopunctata (Linnaeus, 1758)	Sochi	Vicinity of Sochi, 1-15.6.1971, A.L. Lobanov	43.5855	39.7231	1971	Zoological Institute, Russian Academy of Sciences
Psyllobora vigintiduopunctata (Linnaeus, 1758)	Sochi	Sovkhoz "Russia"	43.3907	39.9848	1985	A.G. Koval
Psyllobora vigintiduopunctata (Linnaeus, 1758)	Anapa	Anapa, Dzhemete, 27.5.1988, A.I. Prikhod’ko	44.9513	37.3237	1988	A.I. Prikhod’ko
Psyllobora vigintiduopunctata (Linnaeus, 1758)	Sochi	Sochi, 1988, V.L. Filippov	43.5855	39.7231	1988	V.L. Filippov
Psyllobora vigintiduopunctata (Linnaeus, 1758)	Anapa	Anapa, the cliff near the sea, sweep netting of grasses, 12.8.1990 and 17.8.1990	44.895	37.3162	1990	A.O. Bieńkowski1 and M.J. Orlova-Bienkowskaja
Psyllobora vigintiduopunctata (Linnaeus, 1758)	Anapa	Anapa, Dzhemete, sweep netting of Fabaceae, 10.8.1990	44.9513	37.3237	1990	A.O. Bieńkowski1 and M.J. Orlova-Bienkowskaja
Psyllobora vigintiduopunctata (Linnaeus, 1758)	Anapa	Anapa, Dzhemete, forest belt, sweep netting of grasses, 16.8.1990	44.9513	37.3237	1990	A.O. Bieńkowski1 and M.J. Orlova-Bienkowskaja
Psyllobora vigintiduopunctata (Linnaeus, 1758)	Anapa	Anapa, Dzhemete, the meadow, sweep netting, 13.8.1990	44.9513	37.3237	1990	A.O. Bieńkowski1 and M.J. Orlova-Bienkowskaja
Psyllobora vigintiduopunctata (Linnaeus, 1758)	Anapa	Vicinity of Malyj Utrish, on the grass, 21.5.1995	44.7094	37.4572	1995	A.O. Bieńkowski1 and M.J. Orlova-Bienkowskaja
Psyllobora vigintiduopunctata (Linnaeus, 1758)	Novorossijsk	Abrau, the meadow near the pond, 19.5.1995 and 14.5.1995	44.7003	37.5973	1995	A.O. Bieńkowski1 and M.J. Orlova-Bienkowskaja
Psyllobora vigintiduopunctata (Linnaeus, 1758)	Sochi	Sochi, 31.5.2008	43.5855	39.7231	2008	A.O. Bieńkowski1 and M.J. Orlova-Bienkowskaja
Psyllobora vigintiduopunctata (Linnaeus, 1758)	Sochi	Sochi, sweep netting of grasses, 31.5.2008	43.5855	39.7231	2008	A.O. Bieńkowski1 and M.J. Orlova-Bienkowskaja
Psyllobora vigintiduopunctata (Linnaeus, 1758)	Sochi	Sochi, the hill near Fabritsiusa Street, sweep netting of grasses, 1.6.2008	43.5795	39.7492	2008	A.O. Bieńkowski1 and M.J. Orlova-Bienkowskaja
Psyllobora vigintiduopunctata (Linnaeus, 1758)	Sochi	Verkhnij Jurt, sweep netting of grasses and bushes, 20.5.2008	43.6341	39.7701	2008	A.O. Bieńkowski1 and M.J. Orlova-Bienkowskaja
Psyllobora vigintiduopunctata (Linnaeus, 1758)	Sochi	Razdolnoe, sweep netting of grasses, 18.5.2008	43.5834	39.7716	2008	A.O. Bieńkowski1 and M.J. Orlova-Bienkowskaja
Psyllobora vigintiduopunctata (Linnaeus, 1758)	Sochi	Razdolnoe, sweep netting of grasses, 24.5.2008	43.5834	39.7716	2008	A.O. Bieńkowski1 and M.J. Orlova-Bienkowskaja
Psyllobora vigintiduopunctata (Linnaeus, 1758)	Sochi	Razdolnoe, sweep netting of grasses, 24.5.2008	43.5834	39.7716	2008	A.O. Bieńkowski1 and M.J. Orlova-Bienkowskaja
Psyllobora vigintiduopunctata (Linnaeus, 1758)	Sochi	Sochi	43.5855	39.7231	2011	[Mokhrin. 2012]
Psyllobora vigintiduopunctata (Linnaeus, 1758)	Sochi	Sochi, Arboretum, 10.5.2013	43.5718	39.7428	2013	A.O. Bieńkowski1 and M.J. Orlova-Bienkowskaja
Psyllobora vigintiduopunctata (Linnaeus, 1758)	Sochi	Sochi, the hill near Fabritsiusa Street, the edge of the deciduous forest, sweep netting, 30.4.2013	43.5795	39.7492	2013	A.O. Bieńkowski1 and M.J. Orlova-Bienkowskaja
Psyllobora vigintiduopunctata (Linnaeus, 1758)	Sochi	Sochi,The twentieth mountain rifle division street, 30.4.2013	43.5714	39.7573	2013	A.O. Bieńkowski1 and M.J. Orlova-Bienkowskaja
Psyllobora vigintiduopunctata (Linnaeus, 1758)	Sochi	Sochi, Bytkha, 8.5.2013	43.5654	39.7613	2013	A.O. Bieńkowski1 and M.J. Orlova-Bienkowskaja
Psyllobora vigintiduopunctata (Linnaeus, 1758)	Sochi	Razdolnoe, deciduous forest on the hill slope, pitfall traps, 29.4-12.5.2013	43.5834	39.7716	2013	A.O. Bieńkowski1 and M.J. Orlova-Bienkowskaja
Psyllobora vigintiduopunctata (Linnaeus, 1758)	Sochi	Razdolnoe, floodplain, sweep netting, 1.5.2013	43.5834	39.7716	2013	A.O. Bieńkowski1 and M.J. Orlova-Bienkowskaja
Psyllobora vigintiduopunctata (Linnaeus, 1758)	Sochi	Sochi, Razdolnoe, the hill, the edge of the deciduous forest, sweep netting, 1.5.2013	43.5834	39.7716	2013	A.O. Bieńkowski1 and M.J. Orlova-Bienkowskaja
Psyllobora vigintiduopunctata (Linnaeus, 1758)	Sochi	Abazinka, sweep netting, 6.5.2013	43.6089	39.8256	2013	A.O. Bieńkowski1 and M.J. Orlova-Bienkowskaja
Psyllobora vigintiduopunctata (Linnaeus, 1758)	Sochi	Semenovka, sweep netting of grasses and bushes in the meadows and the road edge in the ddeciduous forest, 6.5.2013	43.6419	39.8502	2013	A.O. Bieńkowski1 and M.J. Orlova-Bienkowskaja
Psyllobora vigintiduopunctata (Linnaeus, 1758)	Sochi	Adler, Kurortnyj Gorodok, the lawn, sweep netting, 11.5.2013	43.4681	39.8968	2013	A.O. Bieńkowski1 and M.J. Orlova-Bienkowskaja
Psyllobora vigintiduopunctata (Linnaeus, 1758)	Sochi	Adler, the floodplain of Mzymta river, 11.5.2013	43.4184	39.9243	2013	A.O. Bieńkowski1 and M.J. Orlova-Bienkowskaja
Psyllobora vigintiduopunctata (Linnaeus, 1758)	Sochi	Psou, deciduous forest on the hill, 2.5.2013	43.3951	40.0082	2013	A.O. Bieńkowski1 and M.J. Orlova-Bienkowskaja
Psyllobora vigintiduopunctata (Linnaeus, 1758)	Sochi	Psou, wasteland, sweep netting, 2.5.2013	43.3951	40.0082	2013	A.O. Bieńkowski1 and M.J. Orlova-Bienkowskaja
Psyllobora vigintiduopunctata (Linnaeus, 1758)	Sochi	Psou village, roadside, wasteland, sweep netting, 2.5.2013	43.3951	40.0082	2013	A.O. Bieńkowski1 and M.J. Orlova-Bienkowskaja
Psyllobora vigintiduopunctata (Linnaeus, 1758)	Sochi	Monastyr, sweep netting of grasses and bushes, 3.5.2013	43.5919	40.01	2013	A.O. Bieńkowski1 and M.J. Orlova-Bienkowskaja
Psyllobora vigintiduopunctata (Linnaeus, 1758)	Novorossijsk	Vicinity of Abrau Lake, sweep netting, 8.5.2016	44.7003	37.5973	2016	A.O. Bieńkowski1 and M.J. Orlova-Bienkowskaja
Psyllobora vigintiduopunctata (Linnaeus, 1758)	Sochi	Gornyj Vozdukh railway station, sweep netting of grasses and bushes, 20.5.2016	43.6801	39.6	2016	A.O. Bieńkowski1 and M.J. Orlova-Bienkowskaja
Psyllobora vigintiduopunctata (Linnaeus, 1758)	Sochi	Sochi, 17.5.2016	43.5855	39.7231	2016	A.O. Bieńkowski1 and M.J. Orlova-Bienkowskaja
Psyllobora vigintiduopunctata (Linnaeus, 1758)	Sochi	Sochi, forest edge, sweep netting, 18.5.2016	43.5855	39.7231	2016	A.O. Bieńkowski1 and M.J. Orlova-Bienkowskaja
Psyllobora vigintiduopunctata (Linnaeus, 1758)	Sochi	Sochi,Fabritsiusa Street, wasteland, sweep netting, 23.5.2016	43.5795	39.7492	2016	A.O. Bieńkowski1 and M.J. Orlova-Bienkowskaja
Psyllobora vigintiduopunctata (Linnaeus, 1758)	Sochi	Adler, near the airport waste land and roadside, sweep netting, 22.5.2016	43.4476	39.9392	2016	A.O. Bieńkowski1 and M.J. Orlova-Bienkowskaja
Psyllobora vigintiduopunctata (Linnaeus, 1758)	Sochi	Adler, near the airport waste land and roadside, sweep netting, 22.5.2016	43.4476	39.9392	2016	A.O. Bieńkowski1 and M.J. Orlova-Bienkowskaja
Psyllobora vigintiduopunctata (Linnaeus, 1758)	Sochi	Adler, Imeretinskaya lowland, lawn, sweep netting, 19.5.2016	43.41	39.9787	2016	A.O. Bieńkowski1 and M.J. Orlova-Bienkowskaja
Psyllobora vigintiduopunctata (Linnaeus, 1758)	Sochi	Adler, bank of Psou River, sweep netting, 22.5.2016	43.3951	40.0082	2016	A.O. Bieńkowski1 and M.J. Orlova-Bienkowskaja
Psyllobora vigintiduopunctata (Linnaeus, 1758)	Sochi	Sochi, right bank of the floodplain of Sochi river, sweep netting, 10.6.2017	43.5959	39.7226	2017	A.O. Bieńkowski1 and M.J. Orlova-Bienkowskaja
Psyllobora vigintiduopunctata (Linnaeus, 1758)	Sochi	Sochi, shaking of bushes in the evening, 12.6.2017	43.5855	39.7231	2017	A.O. Bieńkowski1 and M.J. Orlova-Bienkowskaja
Psyllobora vigintiduopunctata (Linnaeus, 1758)	Sochi	Sochi, shaking of bushes in the evening, 13.6.2017	43.5855	39.7231	2017	A.O. Bieńkowski1 and M.J. Orlova-Bienkowskaja
Psyllobora vigintiduopunctata (Linnaeus, 1758)	Sochi	Sochi, shaking of bushes in the evening, 9.6.2017	43.5855	39.7231	2017	A.O. Bieńkowski1 and M.J. Orlova-Bienkowskaja
Psyllobora vigintiduopunctata (Linnaeus, 1758)	Sochi	Sochi,Fabritsiusa Street, wasteland and lawn, sweep netting, 14.6.2017	43.5795	39.7492	2017	A.O. Bieńkowski1 and M.J. Orlova-Bienkowskaja
Psyllobora vigintiduopunctata (Linnaeus, 1758)	Sochi	Sochi,Fabritsiusa Street, wasteland, sweep netting, 2.6.2017	43.5795	39.7492	2017	A.O. Bieńkowski1 and M.J. Orlova-Bienkowskaja
Psyllobora vigintiduopunctata (Linnaeus, 1758)	Sochi	Sochi,Fabritsiusa Street, wasteland, sweep netting, 2.6.2017	43.5795	39.7492	2017	A.O. Bieńkowski1 and M.J. Orlova-Bienkowskaja
Psyllobora vigintiduopunctata (Linnaeus, 1758)	Sochi	Sochi,Fabritsiusa Street, wasteland, sweep netting, 7.6.2017	43.5795	39.7492	2017	A.O. Bieńkowski1 and M.J. Orlova-Bienkowskaja
Psyllobora vigintiduopunctata (Linnaeus, 1758)	Sochi	Plastunka, road edge, sweep netting, 5.6.2017	43.6825	39.761	2017	A.O. Bieńkowski1 and M.J. Orlova-Bienkowskaja
Psyllobora vigintiduopunctata (Linnaeus, 1758)	Sochi	Razdolnoe, floodplain of Mzymta River, meadow-wasteland, sweep netting, 6.6.2017	43.5834	39.7716	2017	A.O. Bieńkowski1 and M.J. Orlova-Bienkowskaja
Psyllobora vigintiduopunctata (Linnaeus, 1758)	Sochi	Adler, Imeretinskij Resort, bank of the pond, sweep netting, 3.6.2017	43.4119	39.9743	2017	A.O. Bieńkowski1 and M.J. Orlova-Bienkowskaja
Psyllobora vigintiduopunctata (Linnaeus, 1758)	Sochi	Adler, Imeretinskij Resort, waste land, sweep netting at night, 15.6.2017	43.4119	39.9743	2017	A.O. Bieńkowski1 and M.J. Orlova-Bienkowskaja
Psyllobora vigintiduopunctata (Linnaeus, 1758)	Sochi	Adler, Imeretinskaya lowland, bank of the pond, sweep netting, 11.6.2017	43.41	39.9787	2017	A.O. Bieńkowski1 and M.J. Orlova-Bienkowskaja
Psyllobora vigintiduopunctata (Linnaeus, 1758)	Sochi	Adler, Imeretinskaya lowland, waste land, sweep netting in the evening, 16.6.2017	43.41	39.9787	2017	A.O. Bieńkowski1 and M.J. Orlova-Bienkowskaja
Psyllobora vigintiduopunctata (Linnaeus, 1758)	Sochi	Adler, Imeretinskaya lowland, waste land, sweep netting, 11.6.2017	43.41	39.9787	2017	A.O. Bieńkowski1 and M.J. Orlova-Bienkowskaja
Psyllobora vigintiduopunctata (Linnaeus, 1758)	Sochi	Adler, Chereshnya village, deciduous forest and meadows on the mountain, sweep netting, 18.6.2017	43.4492	39.9852	2017	A.O. Bieńkowski1 and M.J. Orlova-Bienkowskaja
Psyllobora vigintiduopunctata (Linnaeus, 1758)	Anapa	Sukko, 16.7.2018	44.7913	37.4023	2018	E.A. Khachikov
Psyllobora vigintiduopunctata (Linnaeus, 1758)	Sochi	Golovinka, Shakhe river floodplain, sweep netting of grasses and bushes, 12.5.2018	43.7938	39.4688	2018	A.O. Bieńkowski1 and M.J. Orlova-Bienkowskaja
Psyllobora vigintiduopunctata (Linnaeus, 1758)	Sochi	Sochi, Mamajsjij Forestpark, 21.4.2018	43.6274	39.7088	2018	A.O. Bieńkowski1 and M.J. Orlova-Bienkowskaja
Psyllobora vigintiduopunctata (Linnaeus, 1758)	Sochi	Sochi, Mamajsjij Forestpark, sweep netting of grasses, 21.4.2018	43.6274	39.7088	2018	A.O. Bieńkowski1 and M.J. Orlova-Bienkowskaja
Psyllobora vigintiduopunctata (Linnaeus, 1758)	Sochi	Sochi, 26.4.2018	43.5855	39.7231	2018	A.O. Bieńkowski1 and M.J. Orlova-Bienkowskaja
Psyllobora vigintiduopunctata (Linnaeus, 1758)	Sochi	Sochi, 27.4.2018	43.5855	39.7231	2018	A.O. Bieńkowski1 and M.J. Orlova-Bienkowskaja
Psyllobora vigintiduopunctata (Linnaeus, 1758)	Sochi	Sochi, shaking of bushes in the evening, 10.5.2018	43.5855	39.7231	2018	A.O. Bieńkowski1 and M.J. Orlova-Bienkowskaja
Psyllobora vigintiduopunctata (Linnaeus, 1758)	Sochi	Sochi, shaking of bushes in the evening, 21.4.2018	43.5855	39.7231	2018	A.O. Bieńkowski1 and M.J. Orlova-Bienkowskaja
Psyllobora vigintiduopunctata (Linnaeus, 1758)	Sochi	Sochi, shaking of bushes in the evening, 24.4.2018	43.5855	39.7231	2018	A.O. Bieńkowski1 and M.J. Orlova-Bienkowskaja
Psyllobora vigintiduopunctata (Linnaeus, 1758)	Sochi	Sochi, shaking of bushes in the evening, 29.4.2018	43.5855	39.7231	2018	A.O. Bieńkowski1 and M.J. Orlova-Bienkowskaja
Psyllobora vigintiduopunctata (Linnaeus, 1758)	Sochi	Sochi, shaking of bushes in the evening, 9.5.2018	43.5855	39.7231	2018	A.O. Bieńkowski1 and M.J. Orlova-Bienkowskaja
Psyllobora vigintiduopunctata (Linnaeus, 1758)	Sochi	Sochi, shaking of bushes, 24.4.2018	43.5855	39.7231	2018	A.O. Bieńkowski1 and M.J. Orlova-Bienkowskaja
Psyllobora vigintiduopunctata (Linnaeus, 1758)	Sochi	Plastunka, edge of deciduous forest on the mountain slope, sweep netting, 9.5.2018	43.6825	39.761	2018	A.O. Bieńkowski1 and M.J. Orlova-Bienkowskaja
Psyllobora vigintiduopunctata (Linnaeus, 1758)	Sochi	Piket Mountain, deciduous forest, sweep netting of bushes, 11.5.2018	43.6433	39.7883	2018	A.O. Bieńkowski1 and M.J. Orlova-Bienkowskaja
Psyllobora vigintiduopunctata (Linnaeus, 1758)	Sochi	Adler, near Olympic Village railway station, waste land, sweep netting, 4.5.2018	43.4177	39.9462	2018	A.O. Bieńkowski1 and M.J. Orlova-Bienkowskaja
Psyllobora vigintiduopunctata (Linnaeus, 1758)	Sochi	Adler, near Imeretinskij Resort railway station, waste land near the chanel, sweep netting, 4.5.2018	43.4119	39.9743	2018	A.O. Bieńkowski1 and M.J. Orlova-Bienkowskaja
Psyllobora vigintiduopunctata (Linnaeus, 1758)	Anapa	Sukko, 3-4.06.2019	44.7913	37.4023	2019	E.A. Khachikov
Psyllobora vigintiduopunctata (Linnaeus, 1758)	Tuapsinskiy district	Vicinity of Agoj-Shapsug, the bank of Agoj river, 29.6-2.7.2020, M.A. Lychak	44.1813	39.0685	2020	M.A. Lychak
Psyllobora vigintiduopunctata (Linnaeus, 1758)	Sochi	Adler, Moldovka, glade ЛЭП на холме, sweep netting, shaking of bushes, 17.9.2020	43.4579	39.9441	2020	A.O. Bieńkowski1 and M.J. Orlova-Bienkowskaja
Psyllobora vigintiduopunctata (Linnaeus, 1758)	Sochi	Adler, Moldovka, холм, shaking of bushes, 19.9.2020	43.4579	39.9441	2020	A.O. Bieńkowski1 and M.J. Orlova-Bienkowskaja
Psyllobora vigintiduopunctata (Linnaeus, 1758)	Sochi	Adler, Moldovka, холм, травостойная ловушка на опушке леса, 16-26.9.2020	43.4579	39.9441	2020	A.O. Bieńkowski1 and M.J. Orlova-Bienkowskaja
Psyllobora vigintiduopunctata (Linnaeus, 1758)	Sochi	Adler, Moldovka, sweep netting and shaking of bushes по улице at night, 16-17.9.2020	43.4551	39.9499	2020	A.O. Bieńkowski1 and M.J. Orlova-Bienkowskaja
Psyllobora vigintiduopunctata (Linnaeus, 1758)	Sochi	Adler, Moldovka, улица, sweep netting, shaking of bushes, 17.9.2020	43.4551	39.9499	2020	A.O. Bieńkowski1 and M.J. Orlova-Bienkowskaja
Psyllobora vigintiduopunctata (Linnaeus, 1758)	Sochi	Adler, Moldovka, shaking of bushes at night 18-19.9.2020	43.4551	39.9499	2020	A.O. Bieńkowski1 and M.J. Orlova-Bienkowskaja
Psyllobora vigintiduopunctata (Linnaeus, 1758)	Sochi	Adler, Moldovka, shaking of bushes at night at the airport fence, 21.9.2020	43.4531	39.9559	2020	A.O. Bieńkowski1 and M.J. Orlova-Bienkowskaja
Psyllobora vigintiduopunctata (Linnaeus, 1758)	Sochi	Adler, wasteland near the reilway station "Olimpic Park", 25.9.2020 и 26.9.2020	43.4132	39.9695	2020	A.O. Bieńkowski1 and M.J. Orlova-Bienkowskaja
Psyllobora vigintiduopunctata (Linnaeus, 1758)	Sochi	Adler, Moldovka, floodplain of Mzymta river, sweep netting and shaking of bushes, 18.9.2020	43.4649	39.9752	2020	A.O. Bieńkowski1 and M.J. Orlova-Bienkowskaja
Psyllobora vigintiduopunctata (Linnaeus, 1758)	Sochi	Adler, Moldovka, floodplain of Mzymta river, sweep netting and shaking of bushes, 17.9.2020	43.4649	39.9752	2020	A.O. Bieńkowski1 and M.J. Orlova-Bienkowskaja
Psyllobora vigintiduopunctata (Linnaeus, 1758)	Sochi	Adler, СТ Высокое, сорняки и сад, sweep netting, 20.9.2020	43.4976	39.9768	2020	A.O. Bieńkowski1 and M.J. Orlova-Bienkowskaja
Psyllobora vigintiduopunctata (Linnaeus, 1758)	Sochi	Adler, deciduous forest по дороге близ СТ Высокое, sweep netting and shaking of bushes, 20.9.2020	43.4976	39.9768	2020	A.O. Bieńkowski1 and M.J. Orlova-Bienkowskaja
Psyllobora vigintiduopunctata (Linnaeus, 1758)	Sochi	Adler, glade в лиственном лесу по хребту от СТ Высокое до СТ Дорожник, sweep netting and shaking of bushes, 23.9.2020	43.4976	39.9768	2020	A.O. Bieńkowski1 and M.J. Orlova-Bienkowskaja
Psyllobora vigintiduopunctata (Linnaeus, 1758)	Sochi	Adler, glade по хребту от СТ Высокое до СТ Дорожник, sweep netting and shaking of bushes, 23.9.2020	43.4976	39.9768	2020	A.O. Bieńkowski1 and M.J. Orlova-Bienkowskaja
Psyllobora vigintiduopunctata (Linnaeus, 1758)	Sochi	Adler, Веселое, tangerine garden, shaking of bushes, 24.9.2020	43.4096	39.9842	2020	A.O. Bieńkowski1 and M.J. Orlova-Bienkowskaja
Psyllobora vigintiduopunctata (Linnaeus, 1758)	Sochi	Adler, близ Ахштырской пещеры, deciduous forest, shaking of bushes, 22.9.2020	43.5203	39.9954	2020	A.O. Bieńkowski1 and M.J. Orlova-Bienkowskaja
Rodolia cardinalis (Mulsant, 1850)	Sochi	Adler, Veseloe, tangerine garden, 43.409272 N, 39.984822 E, shaking of branches of tangerine trees, 14.5.2018	43.4096	39.9842	2018	A.O. Bieńkowski1 and M.J. Orlova-Bienkowskaja
Rodolia cardinalis (Mulsant, 1850)	Sochi	Адлер, Veseloe, tangerine garden, 43.409272 N, 39.984822 E, shaking of bushes мандаринов, 24.9.2020	43.4096	39.9842	2020	A.O. Bieńkowski1 and M.J. Orlova-Bienkowskaja
Scymnus apetzi Mulsant, 1846	Anapa	Anapa, 5.8.1906, B. Il'in	44.895	37.3162	1906	Zoological Institute, Russian Academy of Sciences
Scymnus apetzi Mulsant, 1846	Gelendzhik	Gelendzhik, 7-9.9.1979, B.A. Korotyaev	44.5611	38.0768	1979	Zoological Institute, Russian Academy of Sciences
Scymnus apetzi Mulsant, 1846	Anapa	Vicinity of Malyj Utrish, Shirokaya, 200-400 m a.s.l., meadows in the forest sweep netting of grasses, 12.5.1995	44.7227	37.4525	1995	A.O. Bieńkowski1 and M.J. Orlova-Bienkowskaja
Scymnus apetzi Mulsant, 1846	Tuapsinskiy district	Krasnodar region, Dzhubga, the seashore, 15.6.1997, K. Tomkovitch	44.3147	38.7016	1997	K.P. Tomkovich
Scymnus apetzi Mulsant, 1846	Anapa	Malyj Utrish, meadow behind Sukhoj Liman, 15.6.2000, K.B. Gongalsky	44.7609	37.3864	2000	K.B. Gongalsky
Scymnus apetzi Mulsant, 1846	Anapa	Bolshoj Utrish, 15-25.8.2011 A.A. Dergalev	44.7609	37.3864	2011	All-Russian center for plant quarantine
Scymnus apetzi Mulsant, 1846	Anapa	vicinity of Bolshoj Utrish, 10-30.8.2012 A.A. Dergalev	44.7609	37.3864	2012	All-Russian center for plant quarantine
Scymnus apetzi Mulsant, 1846	Anapa	Vicinity of Malyj Utrish, biological station, 29.5-6.6.2013 A.S. Prosvirov	44.7094	37.4572	2013	A.S. Prosvirov
Scymnus apetzi Mulsant, 1846	Anapa	Vicinity of Malyj Utrish, biological station, 29.5-6.6.2013 A.S. Prosvirov	44.7094	37.4572	2013	A.S. Prosvirov
Scymnus apetzi Mulsant, 1846	Anapa	vicinity of Bolshoj Utrish, 15-30.8.2013, A.A. Dergalev	44.7609	37.3864	2013	All-Russian center for plant quarantine
Scymnus apetzi Mulsant, 1846	Gelendzhik	Vicinity of Gelendzhik, near Aderbievka, mountain meadow, sweep netting, 15.5.2016	44.6071	38.1023	2016	A.O. Bieńkowski1 and M.J. Orlova-Bienkowskaja
Scymnus ater Kugelann, 1794	Sochi	Adler, the garden community "Vysokoe", пруд, sweep netting по берегу, 20.9.2020	43.4976	39.9768	2020	A.O. Bieńkowski1 and M.J. Orlova-Bienkowskaja
Scymnus auritus Thunberg, 1795	Sochi	Sochi, the hill near Fabritsiusa Street, sweep netting of grasses, 1.6.2008	43.5795	39.7492	2008	A.O. Bieńkowski1 and M.J. Orlova-Bienkowskaja
Scymnus auritus Thunberg, 1795	Anapa	Vicinity of Malyj Utrish, Lobanova Shchel, wasteland near the houses, sweep netting, 9.5.2016	44.7095	37.4755	2016	A.O. Bieńkowski1 and M.J. Orlova-Bienkowskaja
Scymnus auritus Thunberg, 1795	Anapa	Vicinity of Malyj Utrish, Lobanova Shchel, forest and meadows, sweep netting, 9.5.2016	44.7095	37.4755	2016	A.O. Bieńkowski1 and M.J. Orlova-Bienkowskaja
Scymnus auritus Thunberg, 1795	Anapa	Vicinity of Malyj Utrish, Lobanova Shchel, wasteland near the houses, sweep netting, 9.5.2016	44.7095	37.4755	2016	A.O. Bieńkowski1 and M.J. Orlova-Bienkowskaja
Scymnus auritus Thunberg, 1795	Sochi	Gornyj Vozdukh railway station, sweep netting of grasses, 19.5.2016	43.6801	39.6	2016	A.O. Bieńkowski1 and M.J. Orlova-Bienkowskaja
Scymnus auritus Thunberg, 1795	Sochi	Adler, Chereshnya village, deciduous forest and meadows, 18.6.2017	43.4492	39.9852	2017	A.O. Bieńkowski1 and M.J. Orlova-Bienkowskaja
Scymnus auritus Thunberg, 1795	Sochi	Chernomorskaya Province			~1900	[Jacobson, 1915]
Scymnus frontalis (Fabricius, 1787)	Sochi	Caucasus occ., Krasnaja Polana, 05-1907, Kiritschenko	43.68	40.2055	1907	Zoological Institute, Russian Academy of Sciences
Scymnus frontalis (Fabricius, 1787)	Sochi	Adler, 7-17.6.1909, G.G. Sumakov	43.4382	39.9112	1909	All-Russian center for plant quarantine
Scymnus frontalis (Fabricius, 1787)	Gelendzhik	Markotkh 8.1911	44.5989	38.0694	1911	[Bogdanov-Katjkov, 1916]
Scymnus frontalis (Fabricius, 1787)	Sochi	W. Caucasus, Soloniki, Lazarevskoe, near Zusvadzh Rever, 20.7.1984, V.N. Prasolov	43.8872	39.3779	1984	Zoological Institute, Russian Academy of Sciences
Scymnus frontalis (Fabricius, 1787)	Gelendzhik	Gelendzhik district, Markhotkh ridge, 26.6.1989, V.N. Prasolov	44.5989	38.0694	1989	Zoological Institute, Russian Academy of Sciences
Scymnus frontalis (Fabricius, 1787)	Anapa	Anapa, meadow on the cliff near the sea, sweep netting, 12.8.1990 and 18.8.1990	44.895	37.3162	1990	A.O. Bieńkowski1 and M.J. Orlova-Bienkowskaja
Scymnus frontalis (Fabricius, 1787)	Anapa	Anapa, Dzhemete, the meadow, sweep netting, 15.8.1990	44.9513	37.3237	1990	A.O. Bieńkowski1 and M.J. Orlova-Bienkowskaja
Scymnus frontalis (Fabricius, 1787)	Anapa	Anapa, Dzhemete, 10.8.1990	44.9513	37.3237	1990	A.O. Bieńkowski1 and M.J. Orlova-Bienkowskaja
Scymnus frontalis (Fabricius, 1787)	Anapa	Vicinity of Anapa, Sukko, the meadow, sweep netting, 21.8.1990	44.7913	37.4023	1990	A.O. Bieńkowski1 and M.J. Orlova-Bienkowskaja
Scymnus frontalis (Fabricius, 1787)	Gelendzhik	Gelendzhik, Cape Tonkij, meadows in the forest, sweep netting, 28.8.1990	44.5622	38.0255	1990	A.O. Bieńkowski1 and M.J. Orlova-Bienkowskaja
Scymnus frontalis (Fabricius, 1787)	Gelendzhik	Gelendzhik district, Dzhankhot, the foothill, the meadow, sweep netting, 4.9.1990	44.4677	38.1569	1990	A.O. Bieńkowski1 and M.J. Orlova-Bienkowskaja
Scymnus frontalis (Fabricius, 1787)	Tuapsinskiy district	14 km south-east to Tuapse, Vishnevka, 10.9.1994, K. Tomkovitch	44.2386	38.9031	1994	All-Russian center for plant quarantine
Scymnus frontalis (Fabricius, 1787)	Tuapsinskiy district	14 km south-east to Tuapse, Vishnevka, 10.9.1994, K. Tomkovitch	44.2386	38.9031	1994	All-Russian center for plant quarantine
Scymnus frontalis (Fabricius, 1787)	Anapa	Vicinity of Malyj Utrish, Shirokaya, sweep netting of grasses in the meadow, 16.5.1995	44.7227	37.4525	1995	A.O. Bieńkowski1 and M.J. Orlova-Bienkowskaja
Scymnus frontalis (Fabricius, 1787)	Anapa	Vicinity of Malyj Utrish, on the grasses, 21.5.1995	44.7094	37.4572	1995	A.O. Bieńkowski1 and M.J. Orlova-Bienkowskaja
Scymnus frontalis (Fabricius, 1787)	Tuapsinskiy district	Krasnodar region, Dzhubga, the seashore, 15.6.1997, K. Tomkovitch	44.3147	38.7016	1997	All-Russian center for plant quarantine
Scymnus frontalis (Fabricius, 1787)	Sochi	Sochi, the hill near Fabritsiusa Street, sweep netting of grasses, 1.6.2008	43.5795	39.7492	2008	A.O. Bieńkowski1 and M.J. Orlova-Bienkowskaja
Scymnus frontalis (Fabricius, 1787)	Sochi	Verkhnij Jurt, 20.5.2008	43.6341	39.7701	2008	A.O. Bieńkowski1 and M.J. Orlova-Bienkowskaja
Scymnus frontalis (Fabricius, 1787)	Sochi	Verkhnij Jurt, sweep netting of grasses and bushes, 20.5.2008	43.6341	39.7701	2008	A.O. Bieńkowski1 and M.J. Orlova-Bienkowskaja
Scymnus frontalis (Fabricius, 1787)	Sochi	Razdolnoe, sweep netting of grasses, 21.5.2008	43.5834	39.7716	2008	A.O. Bieńkowski1 and M.J. Orlova-Bienkowskaja
Scymnus frontalis (Fabricius, 1787)	Sochi	Matsesta, Kurortnyj prospect, lawn, sweep netting, 2.6.2008	43.5444	39.7896	2008	A.O. Bieńkowski1 and M.J. Orlova-Bienkowskaja
Scymnus frontalis (Fabricius, 1787)	Novorossijsk	Novorossiysk env. Andreevsky Pass 500m a.s.l. 44°43’N, 37°51’E M. Danilevsky 4.6.2010	44.7167	37.85	2010	M.L. Danilevsky
Scymnus frontalis (Fabricius, 1787)	Anapa	vicinity of Bolshoj Utrish, 15-30.8.2013, A.A. Dergalev	44.7609	37.3864	2013	All-Russian center for plant quarantine
Scymnus frontalis (Fabricius, 1787)	Tuapsinskiy district	Tuapse, deciduous forest on the hill, 7.5.2013	44.0956	39.0736	2013	A.O. Bieńkowski1 and M.J. Orlova-Bienkowskaja
Scymnus frontalis (Fabricius, 1787)	Tuapsinskiy district	Tuapse, lawns, sweep netting, 7.5.2013	44.0956	39.0736	2013	A.O. Bieńkowski1 and M.J. Orlova-Bienkowskaja
Scymnus frontalis (Fabricius, 1787)	Sochi	Sochi, The Twentieth Mountain Rifle Division street, 30.4.2013	43.5714	39.7573	2013	A.O. Bieńkowski1 and M.J. Orlova-Bienkowskaja
Scymnus frontalis (Fabricius, 1787)	Sochi	Razdolnoe, the hill, the edge of the deciduous forest, sweep netting, 1.5.2013	43.5834	39.7716	2013	A.O. Bieńkowski1 and M.J. Orlova-Bienkowskaja
Scymnus frontalis (Fabricius, 1787)	Sochi	Abazinka, sweep netting, 6.5.2013	43.6089	39.8256	2013	A.O. Bieńkowski1 and M.J. Orlova-Bienkowskaja
Scymnus frontalis (Fabricius, 1787)	Sochi	Semenovka, sweep netting of grasses and bushes on the meadows and the roadside in the deciduous forest, 6.5.2013	43.6419	39.8502	2013	A.O. Bieńkowski1 and M.J. Orlova-Bienkowskaja
Scymnus frontalis (Fabricius, 1787)	Sochi	Psou village, roadside, wasteland, sweep netting, 2.5.2013	43.3951	40.0082	2013	A.O. Bieńkowski1 and M.J. Orlova-Bienkowskaja
Scymnus frontalis (Fabricius, 1787)	Sochi	Monastyr, sweep netting of grasses and bushes, 3.5.2013	43.5919	40.01	2013	A.O. Bieńkowski1 and M.J. Orlova-Bienkowskaja
Scymnus frontalis (Fabricius, 1787)	Anapa	Vicinity of Malyj Utrish, Shirokaya, sweep netting on the roadside, 7.5.2016	44.7227	37.4525	2016	A.O. Bieńkowski1 and M.J. Orlova-Bienkowskaja
Scymnus frontalis (Fabricius, 1787)	Anapa	Vicinity of Malyj Utrish, Shirokaya, sweep netting of grasses on the road side, 7.5.2016	44.7227	37.4525	2016	A.O. Bieńkowski1 and M.J. Orlova-Bienkowskaja
Scymnus frontalis (Fabricius, 1787)	Novorossijsk	Vicinity of Abrau Lake, sweep netting, 8.5.2016	44.7003	37.5973	2016	A.O. Bieńkowski1 and M.J. Orlova-Bienkowskaja
Scymnus frontalis (Fabricius, 1787)	Gelendzhik	Gelendzhik, Cape Tolsty, wasteland, sweep netting, 10.5.2016	44.5511	38.063	2016	A.O. Bieńkowski1 and M.J. Orlova-Bienkowskaja
Scymnus frontalis (Fabricius, 1787)	Gelendzhik	Gelendzhik, Markotkh ridge, deciduous forest, sweep netting, 13.5.2016	44.5989	38.0694	2016	A.O. Bieńkowski1 and M.J. Orlova-Bienkowskaja
Scymnus frontalis (Fabricius, 1787)	Gelendzhik	Gelendzhik, wasteland on the place of the former vineyard, 12.5.2016	44.5611	38.0768	2016	A.O. Bieńkowski1 and M.J. Orlova-Bienkowskaja
Scymnus frontalis (Fabricius, 1787)	Gelendzhik	Vicinity of Gelendzhik, near Aderbievka, mountain meadow, sweep netting, 15.5.2016	44.6071	38.1023	2016	A.O. Bieńkowski1 and M.J. Orlova-Bienkowskaja
Scymnus frontalis (Fabricius, 1787)	Sochi	Gornyj Vozdukh railway station, sweep netting of grasses and bushes, 20.5.2016	43.6801	39.6	2016	A.O. Bieńkowski1 and M.J. Orlova-Bienkowskaja
Scymnus frontalis (Fabricius, 1787)	Sochi	Lower Uch-Dere, sweep netting, 20.5.2016	43.6595	39.6271	2016	A.O. Bieńkowski1 and M.J. Orlova-Bienkowskaja
Scymnus frontalis (Fabricius, 1787)	Sochi	Adler, near the airport waste land and roadside, sweep netting, 22.5.2016	43.4476	39.9392	2016	A.O. Bieńkowski1 and M.J. Orlova-Bienkowskaja
Scymnus frontalis (Fabricius, 1787)	Sochi	Sochi, Fabritsiusa Street, wasteland, sweep netting, 2.6.2017	43.5795	39.7492	2017	A.O. Bieńkowski1 and M.J. Orlova-Bienkowskaja
Scymnus frontalis (Fabricius, 1787)	Sochi	Sochi, Fabritsiusa Street, wasteland, sweep netting, 7.6.2017	43.5795	39.7492	2017	A.O. Bieńkowski1 and M.J. Orlova-Bienkowskaja
Scymnus frontalis (Fabricius, 1787)	Sochi	Plastunka, road side, sweep netting, 5.6.2017	43.6825	39.761	2017	A.O. Bieńkowski1 and M.J. Orlova-Bienkowskaja
Scymnus frontalis (Fabricius, 1787)	Sochi	Razdolnoe, floodplain of Mzymta River, meadow-wasteland, sweep netting, 6.6.2017	43.5834	39.7716	2017	A.O. Bieńkowski1 and M.J. Orlova-Bienkowskaja
Scymnus frontalis (Fabricius, 1787)	Sochi	Adler, Imeretinskij Resort, waste land, sweep netting at night, 15.6.2017	43.4119	39.9743	2017	A.O. Bieńkowski1 and M.J. Orlova-Bienkowskaja
Scymnus frontalis (Fabricius, 1787)	Sochi	Adler, Imeretinskaya lowland, bank of the pond, sweep netting, 17.6.2017	43.41	39.9787	2017	A.O. Bieńkowski1 and M.J. Orlova-Bienkowskaja
Scymnus frontalis (Fabricius, 1787)	Sochi	Adler, Imeretinskaya lowland, wasteland, sweep netting, 16.6.2017	43.41	39.9787	2017	A.O. Bieńkowski1 and M.J. Orlova-Bienkowskaja
Scymnus frontalis (Fabricius, 1787)	Sochi	Adler, Imeretinskaya lowland, bank of the pond, sweep netting, 17.6.2017	43.41	39.9787	2017	A.O. Bieńkowski1 and M.J. Orlova-Bienkowskaja
Scymnus frontalis (Fabricius, 1787)	Sochi	Adler, Chereshnya village, deciduous forest and meadows, 18.6.2017	43.4492	39.9852	2017	A.O. Bieńkowski1 and M.J. Orlova-Bienkowskaja
Scymnus frontalis (Fabricius, 1787)	Sochi	Adler, Chereshnya village, deciduous forest and meadows on the mountain, sweep netting, 18.6.2017	43.4492	39.9852	2017	A.O. Bieńkowski1 and M.J. Orlova-Bienkowskaja
Scymnus frontalis (Fabricius, 1787)	Anapa	Sukko, 26-30.04.2018	44.7913	37.4023	2018	E.A. Khachikov
Scymnus frontalis (Fabricius, 1787)	Sochi	Razbityj Kotel, forest and meadows on the hill, sweep netting, 30.4.2018	43.6854	39.7287	2018	A.O. Bieńkowski1 and M.J. Orlova-Bienkowskaja
Scymnus frontalis (Fabricius, 1787)	Sochi	Plastunka, deciduous forest on the slope, forest edge, sweep netting, 9.5.2018	43.6825	39.761	2018	A.O. Bieńkowski1 and M.J. Orlova-Bienkowskaja
Scymnus frontalis (Fabricius, 1787)	Sochi	Sochi, garden community "Persik", wasteland, sweep netting, 5.5.2018	43.6265	39.7703	2018	A.O. Bieńkowski1 and M.J. Orlova-Bienkowskaja
Scymnus frontalis (Fabricius, 1787)	Sochi	Sochi, Piket mountain, the road in the forest, sweep netting of bushes and grasses, 11.5.2018	43.6433	39.7883	2018	A.O. Bieńkowski1 and M.J. Orlova-Bienkowskaja
Scymnus frontalis (Fabricius, 1787)	Sochi	Matsesta, valley of Agurchik river, road in the forest, sweep netting, 28.4.2018	43.5444	39.7896	2018	A.O. Bieńkowski1 and M.J. Orlova-Bienkowskaja
Scymnus frontalis (Fabricius, 1787)	Sochi	Sochi, Progress settlement, sweep netting, 25.4.2018	43.5924	39.8328	2018	A.O. Bieńkowski1 and M.J. Orlova-Bienkowskaja
Scymnus frontalis (Fabricius, 1787)	Sochi	Vicinity of Olympic Park, 26-29.3.2019	43.4062	39.9546	2019	E.A. Khachikov
Scymnus frontalis (Fabricius, 1787)	Sochi	Adler, Moldovka, холм, shaking of bushes 19.9.2020	43.4579	39.9441	2020	A.O. Bieńkowski1 and M.J. Orlova-Bienkowskaja
Scymnus frontalis (Fabricius, 1787)	Sochi	Adler, Moldovka, glade ЛЭП на холме, sweep netting, shaking of bushes, 17.9.2020	43.4579	39.9441	2020	A.O. Bieńkowski1 and M.J. Orlova-Bienkowskaja
Scymnus frontalis (Fabricius, 1787)	Sochi	Adler, Moldovka, shaking of bushes in the street, 17.9.2020	43.4551	39.9499	2020	A.O. Bieńkowski1 and M.J. Orlova-Bienkowskaja
Scymnus frontalis (Fabricius, 1787)	Sochi	Adler, Moldovka,Pchelovodov street, sweep netting and shaking of bushes, 16.9.2020	43.455	39.95	2020	A.O. Bieńkowski1 and M.J. Orlova-Bienkowskaja
Scymnus frontalis (Fabricius, 1787)	Sochi	Adler, Moldovka, shaking of bushes at the airport fence at night, 21.9.2020	43.4531	39.9559	2020	A.O. Bieńkowski1 and M.J. Orlova-Bienkowskaja
Scymnus frontalis (Fabricius, 1787)	Sochi	Adler, wasteland near the reilway station "Olimpic Park", 25.9.2020	43.4132	39.9695	2020	A.O. Bieńkowski1 and M.J. Orlova-Bienkowskaja
Scymnus frontalis (Fabricius, 1787)	Sochi	Adler, Moldovka, floodplain of Mzymta river, sweep netting and shaking of bushes, 17.9.2020	43.4649	39.9752	2020	A.O. Bieńkowski1 and M.J. Orlova-Bienkowskaja
Scymnus frontalis (Fabricius, 1787)	Sochi	Adler, Moldovka, floodplain of Mzymta river, sweep netting and shaking of bushes, 18.9.2020	43.4649	39.9752	2020	A.O. Bieńkowski1 and M.J. Orlova-Bienkowskaja
Scymnus frontalis (Fabricius, 1787)	Sochi	Adler, glade в лиственном лесу по хребту от СТ Высокое до СТ Дорожник, sweep netting and shaking of bushes, 23.9.2020	43.4976	39.9768	2020	A.O. Bieńkowski1 and M.J. Orlova-Bienkowskaja
Scymnus frontalis (Fabricius, 1787)	Sochi	Adler, deciduous forest по дороге близ СТ Высокое, sweep netting and shaking of bushes, 20.9.2020	43.4976	39.9768	2020	A.O. Bieńkowski1 and M.J. Orlova-Bienkowskaja
Scymnus frontalis (Fabricius, 1787)	Sochi	Adler, СТ Высокое, сорняки и сад, sweep netting, 20.9.2020	43.4976	39.9768	2020	A.O. Bieńkowski1 and M.J. Orlova-Bienkowskaja
Scymnus frontalis (Fabricius, 1787)	Sochi	Adler, Веселое, tangerine garden, shaking of bushes, 24.9.2020	43.4096	39.9842	2020	A.O. Bieńkowski1 and M.J. Orlova-Bienkowskaja
Scymnus frontalis (Fabricius, 1787)	Sochi	Adler, близ Ахштырской пещеры, deciduous forest, shaking of bushes, 22.9.2020	43.5203	39.9954	2020	A.O. Bieńkowski1 and M.J. Orlova-Bienkowskaja
Scymnus frontalis (Fabricius, 1787)	Sochi	West-Caucas, Utsch-Dere, collection of Rybakov E. Konig	43.6595	39.6271	~1900	Zoological Institute, Russian Academy of Sciences
Scymnus haemorrhoidalis Herbst, 1797	Tuapsinskiy district	Tuapsinskiy district, Kriven'kovskaja, 18.6.1988, Gusarov	44.1893	39.2357	1988	All-Russian center for plant quarantine
Scymnus haemorrhoidalis Herbst, 1797	Sochi	Sochi, sweep netting of grasses, 17.5.2008	43.5855	39.7231	2008	A.O. Bieńkowski1 and M.J. Orlova-Bienkowskaja
Scymnus haemorrhoidalis Herbst, 1797	Sochi	Razdolnoe, sweep netting of grasses at the forest edge, 19.5.2008	43.5834	39.7716	2008	A.O. Bieńkowski1 and M.J. Orlova-Bienkowskaja
Scymnus haemorrhoidalis Herbst, 1797	Sochi	Psou village, roadside, wasteland, sweep netting, 2.5.2013	43.3951	40.0082	2013	A.O. Bieńkowski1 and M.J. Orlova-Bienkowskaja
Scymnus haemorrhoidalis Herbst, 1797	Sochi	Sochi, forest edge, sweep netting, 18.5.2016	43.5855	39.7231	2016	A.O. Bieńkowski1 and M.J. Orlova-Bienkowskaja
Scymnus haemorrhoidalis Herbst, 1797	Sochi	Adler, Imeretinskaya lowland, along the chanel, wasteland, sweep netting, 19.5.2016	43.41	39.9787	2016	A.O. Bieńkowski1 and M.J. Orlova-Bienkowskaja
Scymnus haemorrhoidalis Herbst, 1797	Sochi	Sochi, shaking of bushes in the evening, 13.6.2017	43.5855	39.7231	2017	A.O. Bieńkowski1 and M.J. Orlova-Bienkowskaja
Scymnus haemorrhoidalis Herbst, 1797	Sochi	Sochi, The Twentieth Mountain Rifle Division street, forest edge, sweep netting, 2.6.2017	43.5714	39.7573	2017	A.O. Bieńkowski1 and M.J. Orlova-Bienkowskaja
Scymnus haemorrhoidalis Herbst, 1797	Sochi	Plastunka, roadside, sweep netting, 5.6.2017	43.6825	39.761	2017	A.O. Bieńkowski1 and M.J. Orlova-Bienkowskaja
Scymnus haemorrhoidalis Herbst, 1797	Sochi	Razdolnoe, floodplain of Mzymta River, meadow-wasteland, sweep netting, 6.6.2017	43.5834	39.7716	2017	A.O. Bieńkowski1 and M.J. Orlova-Bienkowskaja
Scymnus haemorrhoidalis Herbst, 1797	Sochi	Adler, Chereshnya Village, deciduous forest and meadows, 18.6.2017	43.4492	39.9852	2017	A.O. Bieńkowski1 and M.J. Orlova-Bienkowskaja
Scymnus haemorrhoidalis Herbst, 1797	Sochi	Sochi, garden community "Persik", wasteland, sweep netting, 5.5.2018	43.6265	39.7703	2018	A.O. Bieńkowski1 and M.J. Orlova-Bienkowskaja
Scymnus haemorrhoidalis Herbst, 1797	Sochi	Sochi, Agur river valley, sweep netting, 28.4.2018	43.5585	39.8256	2018	A.O. Bieńkowski1 and M.J. Orlova-Bienkowskaja
Scymnus haemorrhoidalis Herbst, 1797	Sochi	Adler, near the pond in Olympic Village, 4.5.2018	43.4127	39.9378	2018	A.O. Bieńkowski1 and M.J. Orlova-Bienkowskaja
Scymnus haemorrhoidalis Herbst, 1797	Sochi	Adler, near Olympic Village railway station, waste land, sweep netting, 4.5.2018	43.4177	39.9462	2018	A.O. Bieńkowski1 and M.J. Orlova-Bienkowskaja
Scymnus haemorrhoidalis Herbst, 1797	Sochi	Adler, near Imeretinskij Resort railway station, waste land near the chanel, sweep netting, 4.5.2018	43.4119	39.9743	2018	A.O. Bieńkowski1 and M.J. Orlova-Bienkowskaja
Scymnus haemorrhoidalis Herbst, 1797	Sochi	Adler, Moldovka, shaking of bushes in the street, 17.9.2020	43.4551	39.9499	2020	A.O. Bieńkowski1 and M.J. Orlova-Bienkowskaja
Scymnus haemorrhoidalis Herbst, 1797	Sochi	Adler, wasteland near the reilway station "Olimpic Park", sweep netting, shaking of bushes, 26.9.2020	43.4132	39.9695	2020	A.O. Bieńkowski1 and M.J. Orlova-Bienkowskaja
Scymnus haemorrhoidalis Herbst, 1797	Sochi	Chernomorskaya Province			~1900	[Jacobson, 1915]
Scymnus inderihensis Mulsant, 1850	Sochi	Sochi, 21.7.1927, I. Gudim	43.5855	39.7231	1927	All-Russian center for plant quarantine
Scymnus interruptus (Goeze, 1777)	Sochi	Monastyr, sweep netting of grasses and bushes, 3.5.2013	43.5919	40.01	2013	A.O. Bieńkowski1 and M.J. Orlova-Bienkowskaja
Scymnus interruptus (Goeze, 1777)	Sochi	Sochi, right bank of Sochi river floodplain, meadow, sweep netting, 10.6.2017	43.5959	39.7226	2017	A.O. Bieńkowski1 and M.J. Orlova-Bienkowskaja
Scymnus interruptus (Goeze, 1777)	Sochi	Sochi, shaking of bushes in the evening, 13.6.2017	43.5855	39.7231	2017	A.O. Bieńkowski1 and M.J. Orlova-Bienkowskaja
Scymnus interruptus (Goeze, 1777)	Sochi	Sochi, emarkment on the righ benk of Sochi river, shaking of bushes, 15.5.2018	43.5959	39.7226	2018	A.O. Bieńkowski1 and M.J. Orlova-Bienkowskaja
Scymnus interruptus (Goeze, 1777)	Sochi	Sochi, shaking of bushes in the evening, 24.4.2018	43.5855	39.7231	2018	A.O. Bieńkowski1 and M.J. Orlova-Bienkowskaja
Scymnus interruptus (Goeze, 1777)	Sochi	Sochi, shaking of bushes in the evening, 29.4.2018	43.5855	39.7231	2018	A.O. Bieńkowski1 and M.J. Orlova-Bienkowskaja
Scymnus interruptus (Goeze, 1777)	Sochi	Adler, Moldovka, floodplain of Mzymta river, sweep netting and shaking of bushes, 18.9.2020	43.4649	39.9752	2020	A.O. Bieńkowski1 and M.J. Orlova-Bienkowskaja
Scymnus rubromaculatus (Goeze, 1777)	Gelendzhik	Gelendzhik, 08-1978, Tindo	44.5611	38.0768	1978	All-Russian center for plant quarantine
Scymnus rubromaculatus (Goeze, 1777)	Gelendzhik	Gelendzhik district, Markhotkh ridge, 26.6.1989, V.N. Prasolov	44.5989	38.0694	1989	Zoological Institute, Russian Academy of Sciences
Scymnus rubromaculatus (Goeze, 1777)	Anapa	Anapa, meadow at the cliff at the sea, 17.8.1990	44.895	37.3162	1990	A.O. Bieńkowski1 and M.J. Orlova-Bienkowskaja
Scymnus rubromaculatus (Goeze, 1777)	Anapa	Anapa, Dzhemete, sea shore, sand beach, on Arthymisia, sweep netting, 11.8.1990	44.9513	37.3237	1990	A.O. Bieńkowski1 and M.J. Orlova-Bienkowskaja
Scymnus rubromaculatus (Goeze, 1777)	Anapa	Anapa, Dzhemete, sweep netting of ruderal vegetation, 10.8.1990	44.9513	37.3237	1990	A.O. Bieńkowski1 and M.J. Orlova-Bienkowskaja
Scymnus rubromaculatus (Goeze, 1777)	Anapa	Anapa, Dzhemete, forest belt, sweep netting of grasses, 16.8.1990	44.9513	37.3237	1990	A.O. Bieńkowski1 and M.J. Orlova-Bienkowskaja
Scymnus rubromaculatus (Goeze, 1777)	Anapa	Anapa, Dzhemete, meadow, 16.8.1990	44.9513	37.3237	1990	A.O. Bieńkowski1 and M.J. Orlova-Bienkowskaja
Scymnus rubromaculatus (Goeze, 1777)	Anapa	Vicinity of Anapa, Sukko, the meadow, sweep netting, 21.8.1990	44.7913	37.4023	1990	A.O. Bieńkowski1 and M.J. Orlova-Bienkowskaja
Scymnus rubromaculatus (Goeze, 1777)	Gelendzhik	Gelendzhik, 26.8.1990	44.5611	38.0768	1990	A.O. Bieńkowski1 and M.J. Orlova-Bienkowskaja
Scymnus rubromaculatus (Goeze, 1777)	Anapa	Vicinity of Malyj Utrish, Lobanova Shchel, on the road in the forest, 13.5.1995	44.7095	37.4755	1995	A.O. Bieńkowski1 and M.J. Orlova-Bienkowskaja
Scymnus rubromaculatus (Goeze, 1777)	Tuapsinskiy district	Krasnodar region, Dzhubga, the seashore, 15.6.1997, K. Tomkovitch	44.3147	38.7016	1997	All-Russian center for plant quarantine
Scymnus rubromaculatus (Goeze, 1777)	Gelendzhik	Gelendzhik district, between Krinitsy and Praskoveevka, Temnaya Shchel, on the plants near the sea: clematis and bramble, 28.6.2004, K. Tomkovitch	44.4145	38.2529	2004	All-Russian center for plant quarantine
Scymnus rubromaculatus (Goeze, 1777)	Sochi	Sochi, sweep netting of grasses, 31.5.2008	43.5855	39.7231	2008	A.O. Bieńkowski1 and M.J. Orlova-Bienkowskaja
Scymnus rubromaculatus (Goeze, 1777)	Sochi	Razdolnoe, sweep netting of grasses, 26.5.2008	43.5834	39.7716	2008	A.O. Bieńkowski1 and M.J. Orlova-Bienkowskaja
Scymnus rubromaculatus (Goeze, 1777)	Sochi	Sochi, the slope of Piket mountain near Verkhnij Jurt village, sweep netting, 20.5.2008	43.6433	39.7883	2008	A.O. Bieńkowski1 and M.J. Orlova-Bienkowskaja
Scymnus rubromaculatus (Goeze, 1777)	Anapa	vicinity of Bolshoj Utrish, Sukhoj Liman, 15-25.8.2011, A.A. Dergalev	44.7609	37.3864	2011	All-Russian center for plant quarantine
Scymnus rubromaculatus (Goeze, 1777)	Anapa	vicinity of Bolshoj Utrish, Sukhoj Liman, 28.8.2011, A.A. Dergalev	44.7609	37.3864	2011	All-Russian center for plant quarantine
Scymnus rubromaculatus (Goeze, 1777)	Anapa	vicinity of Bolshoj Utrish, Sukhoj Liman, 10-30.8.2012, A.A. Dergalev	44.7609	37.3864	2012	All-Russian center for plant quarantine
Scymnus rubromaculatus (Goeze, 1777)	Anapa	Vicinity of Malyj Utrish, biological station, 29.5-6.6.2013 A.S. Prosvirov	44.7094	37.4572	2013	A.S. Prosvirov
Scymnus rubromaculatus (Goeze, 1777)	Novorossijsk	Vicinity of Abrau Lake, sweep netting, 8.5.2016	44.7003	37.5973	2016	A.O. Bieńkowski1 and M.J. Orlova-Bienkowskaja
Scymnus rubromaculatus (Goeze, 1777)	Gelendzhik	Gelendzhik, Cape Tolsty, wasteland, sweep netting, 10.5.2016	44.5511	38.063	2016	A.O. Bieńkowski1 and M.J. Orlova-Bienkowskaja
Scymnus rubromaculatus (Goeze, 1777)	Gelendzhik	Gelendzhik, the peak of Markotkh mountain, deciduous forest, sweep netting, 13.5.2016	44.5989	38.0694	2016	A.O. Bieńkowski1 and M.J. Orlova-Bienkowskaja
Scymnus rubromaculatus (Goeze, 1777)	Sochi	Sochi, 17.5.2016	43.5855	39.7231	2016	A.O. Bieńkowski1 and M.J. Orlova-Bienkowskaja
Scymnus rubromaculatus (Goeze, 1777)	Sochi	Sochi, forest edge, sweep netting, 18.5.2016	43.5855	39.7231	2016	A.O. Bieńkowski1 and M.J. Orlova-Bienkowskaja
Scymnus rubromaculatus (Goeze, 1777)	Sochi	Adler, bank of Mzymta River, sweep netting of grasses, 22.5.2016	43.4184	39.9243	2016	A.O. Bieńkowski1 and M.J. Orlova-Bienkowskaja
Scymnus rubromaculatus (Goeze, 1777)	Sochi	Adler, bank of Psou River, sweep netting, 22.5.2016	43.3951	40.0082	2016	A.O. Bieńkowski1 and M.J. Orlova-Bienkowskaja
Scymnus rubromaculatus (Goeze, 1777)	Sochi	Sochi, The Twentieth Mountain Rifle Division street, forest edge, sweep netting, 2.6.2017	43.5714	39.7573	2017	A.O. Bieńkowski1 and M.J. Orlova-Bienkowskaja
Scymnus rubromaculatus (Goeze, 1777)	Sochi	Matsesta, waste land, the lawn, sweep netting, 12.6.2017	43.5444	39.7896	2017	A.O. Bieńkowski1 and M.J. Orlova-Bienkowskaja
Scymnus rubromaculatus (Goeze, 1777)	Anapa	Sukko, 26-30.04.2018	44.7913	37.4023	2018	E.A. Khachikov
Scymnus rubromaculatus (Goeze, 1777)	Sochi	Veseloe, 2.11.2018	43.4175	40.0074	2018	E.A. Khachikov
Scymnus rubromaculatus (Goeze, 1777)	Sochi	Sochi, shaking of bushes in the evening, 3.5.2018	43.5855	39.7231	2018	A.O. Bieńkowski1 and M.J. Orlova-Bienkowskaja
Scymnus rubromaculatus (Goeze, 1777)	Sochi	Sochi, shaking of bushes in the evening, 9.5.2018	43.5855	39.7231	2018	A.O. Bieńkowski1 and M.J. Orlova-Bienkowskaja
Scymnus rubromaculatus (Goeze, 1777)	Sochi	Sochi, shaking of bushes, 24.4.2018	43.5855	39.7231	2018	A.O. Bieńkowski1 and M.J. Orlova-Bienkowskaja
Scymnus rubromaculatus (Goeze, 1777)	Sochi	Razbityj Kotel, forest and meadows on the hill, sweep netting, 30.4.2018	43.6854	39.7287	2018	A.O. Bieńkowski1 and M.J. Orlova-Bienkowskaja
Scymnus rubromaculatus (Goeze, 1777)	Sochi	Sochi, the right bank of the floodplain of Sochi river upstream Podgornaya street, sweep netting, 27.4.2018	43.6187	39.7322	2018	A.O. Bieńkowski1 and M.J. Orlova-Bienkowskaja
Scymnus rubromaculatus (Goeze, 1777)	Sochi	Sochi, garden community "Persik", wasteland, sweep netting, 5.5.2018	43.6265	39.7703	2018	A.O. Bieńkowski1 and M.J. Orlova-Bienkowskaja
Scymnus rubromaculatus (Goeze, 1777)	Sochi	Matsesta, Agur River floodplain, sweep netting, 28.4.2018	43.5444	39.7896	2018	A.O. Bieńkowski1 and M.J. Orlova-Bienkowskaja
Scymnus rubromaculatus (Goeze, 1777)	Sochi	Adler, near Olympic Village railway station, waste land, sweep netting, 4.5.2018	43.4177	39.9462	2018	A.O. Bieńkowski1 and M.J. Orlova-Bienkowskaja
Scymnus rubromaculatus (Goeze, 1777)	Sochi	Adler, Moldovka, холм, shaking of bushes, 19.9.2020	43.4579	39.9441	2020	A.O. Bieńkowski1 and M.J. Orlova-Bienkowskaja
Scymnus rubromaculatus (Goeze, 1777)	Sochi	Adler, Moldovka, floodplain of Mzymta river, sweep netting and shaking of bushes, 17.9.2020	43.4649	39.9752	2020	A.O. Bieńkowski1 and M.J. Orlova-Bienkowskaja
Scymnus rubromaculatus (Goeze, 1777)	Sochi	Adler, Moldovka, floodplain of Mzymta river, sweep netting and shaking of bushes, 18.9.2020	43.4649	39.9752	2020	A.O. Bieńkowski1 and M.J. Orlova-Bienkowskaja
Scymnus rubromaculatus (Goeze, 1777)	Sochi	Adler, glade по хребту от СТ Высокое до СТ Дорожник, sweep netting and shaking of bushes, 23.9.2020	43.4976	39.9768	2020	A.O. Bieńkowski1 and M.J. Orlova-Bienkowskaja
Scymnus rubromaculatus (Goeze, 1777)	Sochi	Adler, deciduous forest по дороге близ СТ Высокое, sweep netting and shaking of bushes, 20.9.2020	43.4976	39.9768	2020	A.O. Bieńkowski1 and M.J. Orlova-Bienkowskaja
Scymnus rubromaculatus (Goeze, 1777)	Sochi	Adler, Веселое, tangerine garden, shaking of bushes, 24.9.2020	43.4096	39.9842	2020	A.O. Bieńkowski1 and M.J. Orlova-Bienkowskaja
Scymnus rubromaculatus (Goeze, 1777)	Sochi	Adler, deciduous forest близ Ахштырской пещеры, sweep netting and shaking of bushes, 22.9.2020	43.5203	39.9954	2020	A.O. Bieńkowski1 and M.J. Orlova-Bienkowskaja
Scymnus rubromaculatus (Goeze, 1777)	Sochi	Chernomorskaya Province			~1900	[Jacobson, 1915]
Scymnus subvillosus (Goeze, 1777)	Sochi	Lazarevskaya, Krasnodar region, 13.8.1952, Rudolf	43.9084	39.3334	1952	Zoological Institute, Russian Academy of Sciences
Scymnus subvillosus (Goeze, 1777)	Gelendzhik	Gelendzhik district, Arkhipo-Osipovka, 6.6.1973, P. Erokhov	44.3701	38.5334	1973	All-Russian center for plant quarantine
Scymnus subvillosus (Goeze, 1777)	Novorossijsk	Between Novorossijsk and Abrau, Southern Ozereevka, on Periploca, 9.7.2001, K. Tomkovitch	44.6738	37.632	2001	All-Russian center for plant quarantine
Scymnus subvillosus (Goeze, 1777)	Gelendzhik	Gelendzhik district, between Krinitsy and Praskoveevka, Temnaya Shchel, on the flowers of the bramble, 28.6.2004, K. Tomkovitch	44.4145	38.2529	2004	All-Russian center for plant quarantine
Scymnus subvillosus (Goeze, 1777)	Sochi	Sochi, 31.5.2008	43.5855	39.7231	2008	A.O. Bieńkowski1 and M.J. Orlova-Bienkowskaja
Scymnus subvillosus (Goeze, 1777)	Sochi	Sochi, sweep netting of grasses, 31.5.2008	43.5855	39.7231	2008	A.O. Bieńkowski1 and M.J. Orlova-Bienkowskaja
Scymnus subvillosus (Goeze, 1777)	Sochi	Sochi, flowers of Rosa and Convolvulus, 22.5.2008	43.5855	39.7231	2008	A.O. Bieńkowski1 and M.J. Orlova-Bienkowskaja
Scymnus subvillosus (Goeze, 1777)	Sochi	Sochi, the hill near Fabritsiusa Street, sweep netting of grasses, 1.6.2008	43.5795	39.7492	2008	A.O. Bieńkowski1 and M.J. Orlova-Bienkowskaja
Scymnus subvillosus (Goeze, 1777)	Sochi	Verkhnij Jurt, sweep netting of grasses and bushes, 20.5.2008	43.6341	39.7701	2008	A.O. Bieńkowski1 and M.J. Orlova-Bienkowskaja
Scymnus subvillosus (Goeze, 1777)	Sochi	Razdolnoe, sweep netting of grasses, 26.5.2008	43.5834	39.7716	2008	A.O. Bieńkowski1 and M.J. Orlova-Bienkowskaja
Scymnus subvillosus (Goeze, 1777)	Sochi	Piket Mountain, 500 m, sweep netting of grasses and bushes, 20.5.2008	43.6433	39.7883	2008	A.O. Bieńkowski1 and M.J. Orlova-Bienkowskaja
Scymnus subvillosus (Goeze, 1777)	Sochi	Matsesta, Kurirtnyj prospect, the lawn, sweep netting, 2.6.2008	43.5444	39.7896	2008	A.O. Bieńkowski1 and M.J. Orlova-Bienkowskaja
Scymnus subvillosus (Goeze, 1777)	Anapa	vicinity of Bolshoj Utrish, 15-25.8.2011, A.A. Dergalev	44.7609	37.3864	2011	All-Russian center for plant quarantine
Scymnus subvillosus (Goeze, 1777)	Anapa	vicinity of Bolshoj Utrish, Sukhoj Liman, 28.8.2011, A.A. Dergalev	44.7609	37.3864	2011	All-Russian center for plant quarantine
Scymnus subvillosus (Goeze, 1777)	Anapa	Vicinity of Malyj Utrish, biological station, 29.5-6.6.2013 A.S. Prosvirov	44.7094	37.4572	2013	A.S. Prosvirov
Scymnus subvillosus (Goeze, 1777)	Tuapsinskiy district	Tuapse, deciduous forest on the hill, 7.5.2013	44.0956	39.0736	2013	A.O. Bieńkowski1 and M.J. Orlova-Bienkowskaja
Scymnus subvillosus (Goeze, 1777)	Tuapsinskiy district	Tuapse, on the lawns, sweep netting, 7.5.2013	44.0956	39.0736	2013	A.O. Bieńkowski1 and M.J. Orlova-Bienkowskaja
Scymnus subvillosus (Goeze, 1777)	Sochi	Sochi, Bytkha, 8.5.2013	43.5654	39.7613	2013	A.O. Bieńkowski1 and M.J. Orlova-Bienkowskaja
Scymnus subvillosus (Goeze, 1777)	Sochi	Razdolnoe, the hill, the edge of the deciduous forest, sweep netting, 1.5.2013	43.5834	39.7716	2013	A.O. Bieńkowski1 and M.J. Orlova-Bienkowskaja
Scymnus subvillosus (Goeze, 1777)	Sochi	Abazinka, 6.5.2013	43.6089	39.8256	2013	A.O. Bieńkowski1 and M.J. Orlova-Bienkowskaja
Scymnus subvillosus (Goeze, 1777)	Sochi	Psou village, roadside, wasteland, sweep netting, 2.5.2013	43.3951	40.0082	2013	A.O. Bieńkowski1 and M.J. Orlova-Bienkowskaja
Scymnus subvillosus (Goeze, 1777)	Sochi	Monastyr, sweep netting of grasses and bushes, 3.5.2013	43.5919	40.01	2013	A.O. Bieńkowski1 and M.J. Orlova-Bienkowskaja
Scymnus subvillosus (Goeze, 1777)	Anapa	Vicinity of Malyj Utrish, bushes near the seashore, 6.5.2016	44.7094	37.4572	2016	A.O. Bieńkowski1 and M.J. Orlova-Bienkowskaja
Scymnus subvillosus (Goeze, 1777)	Anapa	Vicinity of Malyj Utrish, Lobanova Shchel, deciduous forest, sweep netting, 6.5.2016	44.7095	37.4755	2016	A.O. Bieńkowski1 and M.J. Orlova-Bienkowskaja
Scymnus subvillosus (Goeze, 1777)	Anapa	Vicinity of Malyj Utrish, Lobanova Shchel, sweep netting of grasses and shaking of bushes, 6.5.2016	44.7095	37.4755	2016	A.O. Bieńkowski1 and M.J. Orlova-Bienkowskaja
Scymnus subvillosus (Goeze, 1777)	Gelendzhik	Gelendzhik, the slope of Markotkh ridge, sweep netting, 13.5.2016	44.5989	38.0694	2016	A.O. Bieńkowski1 and M.J. Orlova-Bienkowskaja
Scymnus subvillosus (Goeze, 1777)	Gelendzhik	Vicinity of Gelendzhik, Aderbievka, meadows in the forest, sweep netting, 14.5.2016	44.6071	38.1023	2016	A.O. Bieńkowski1 and M.J. Orlova-Bienkowskaja
Scymnus subvillosus (Goeze, 1777)	Sochi	Sochi, 17.5.2016	43.5855	39.7231	2016	A.O. Bieńkowski1 and M.J. Orlova-Bienkowskaja
Scymnus subvillosus (Goeze, 1777)	Sochi	Sochi, forest edge, sweep netting, 18.5.2016	43.5855	39.7231	2016	A.O. Bieńkowski1 and M.J. Orlova-Bienkowskaja
Scymnus subvillosus (Goeze, 1777)	Sochi	Sochi, plants in the street and along the forest edge, sweep netting, 18.5.2016	43.5855	39.7231	2016	A.O. Bieńkowski1 and M.J. Orlova-Bienkowskaja
Scymnus subvillosus (Goeze, 1777)	Sochi	Sochi, Kurortnyj prospect, on oleander, 21.5.2016	43.5807	39.724	2016	A.O. Bieńkowski1 and M.J. Orlova-Bienkowskaja
Scymnus subvillosus (Goeze, 1777)	Sochi	Sochi, Fabritsiusa Street, wasteland, sweep netting, 23.5.2016	43.5795	39.7492	2016	A.O. Bieńkowski1 and M.J. Orlova-Bienkowskaja
Scymnus subvillosus (Goeze, 1777)	Sochi	Adler, Imeretinskaya lowland, waste land along the chanel and rail way, sweep netting of grasses, 19.5.2016	43.41	39.9787	2016	A.O. Bieńkowski1 and M.J. Orlova-Bienkowskaja
Scymnus subvillosus (Goeze, 1777)	Sochi	Adler, Imeretinskaya lowland, lawn, sweep netting, 19.5.2016	43.41	39.9787	2016	A.O. Bieńkowski1 and M.J. Orlova-Bienkowskaja
Scymnus subvillosus (Goeze, 1777)	Sochi	Sochi, shaking of bushes in the evening, 13.6.2017	43.5855	39.7231	2017	A.O. Bieńkowski1 and M.J. Orlova-Bienkowskaja
Scymnus subvillosus (Goeze, 1777)	Sochi	Sochi, shaking of bushes in the evening, 9.6.2017	43.5855	39.7231	2017	A.O. Bieńkowski1 and M.J. Orlova-Bienkowskaja
Scymnus subvillosus (Goeze, 1777)	Sochi	Sochi, Fabritsiusa Street, wasteland, sweep netting, 2.6.2017	43.5795	39.7492	2017	A.O. Bieńkowski1 and M.J. Orlova-Bienkowskaja
Scymnus subvillosus (Goeze, 1777)	Sochi	Adler, Imeretinsky resort railway station, wasteland, sweep netting at night, 15.6.2017	43.4119	39.9743	2017	A.O. Bieńkowski1 and M.J. Orlova-Bienkowskaja
Scymnus subvillosus (Goeze, 1777)	Sochi	Sochi, embarkment on the right bank of Sochi river, shaking of thuja and other bushes, 15.5.2018	43.5959	39.7226	2018	A.O. Bieńkowski1 and M.J. Orlova-Bienkowskaja
Scymnus subvillosus (Goeze, 1777)	Sochi	Sochi, shaking of bushes Rosa, Hybiscus and Spirea, 27.4.2018	43.5855	39.7231	2018	A.O. Bieńkowski1 and M.J. Orlova-Bienkowskaja
Scymnus subvillosus (Goeze, 1777)	Sochi	Sochi, shaking of bushes in the evening, 21.4.2018	43.5855	39.7231	2018	A.O. Bieńkowski1 and M.J. Orlova-Bienkowskaja
Scymnus subvillosus (Goeze, 1777)	Sochi	Sochi, shaking of bushes in the evening, 24.4.2018	43.5855	39.7231	2018	A.O. Bieńkowski1 and M.J. Orlova-Bienkowskaja
Scymnus subvillosus (Goeze, 1777)	Sochi	Sochi, shaking of bushes in the evening, 29.4.2018	43.5855	39.7231	2018	A.O. Bieńkowski1 and M.J. Orlova-Bienkowskaja
Scymnus subvillosus (Goeze, 1777)	Sochi	Sochi, shaking of bushes in the evening, 3.5.2018	43.5855	39.7231	2018	A.O. Bieńkowski1 and M.J. Orlova-Bienkowskaja
Scymnus subvillosus (Goeze, 1777)	Sochi	Sochi, shaking of bushes in the evening, 9.5.2018	43.5855	39.7231	2018	A.O. Bieńkowski1 and M.J. Orlova-Bienkowskaja
Scymnus subvillosus (Goeze, 1777)	Sochi	Sochi, shaking of bushes during the daytime, 24.4.2018	43.5855	39.7231	2018	A.O. Bieńkowski1 and M.J. Orlova-Bienkowskaja
Scymnus subvillosus (Goeze, 1777)	Sochi	Sochi, on bushes, 8.5.2018	43.5855	39.7231	2018	A.O. Bieńkowski1 and M.J. Orlova-Bienkowskaja
Scymnus subvillosus (Goeze, 1777)	Sochi	Sochi, Seafront, shaking of bushes in the evening, 1.5.2018	43.5736	39.7269	2018	A.O. Bieńkowski1 and M.J. Orlova-Bienkowskaja
Scymnus subvillosus (Goeze, 1777)	Sochi	Razbityj Kotel, forest and meadows on the hill, sweep netting, 30.4.2018	43.6854	39.7287	2018	A.O. Bieńkowski1 and M.J. Orlova-Bienkowskaja
Scymnus subvillosus (Goeze, 1777)	Sochi	Sochi, Podgornaya street, shaking of bushes: Rosa, Spirea and Hybiskus, 27.4.2018	43.6187	39.7322	2018	A.O. Bieńkowski1 and M.J. Orlova-Bienkowskaja
Scymnus subvillosus (Goeze, 1777)	Sochi	Sochi, Arboretum, shaking of bushes, 24.4.2018	43.5718	39.7428	2018	A.O. Bieńkowski1 and M.J. Orlova-Bienkowskaja
Scymnus subvillosus (Goeze, 1777)	Sochi	Plastunka, near the pond, sweep netting, 9.5.2018	43.6825	39.761	2018	A.O. Bieńkowski1 and M.J. Orlova-Bienkowskaja
Scymnus subvillosus (Goeze, 1777)	Sochi	Adler, near Olympic Village railway station, waste land, sweep netting, 4.5.2018	43.4177	39.9462	2018	A.O. Bieńkowski1 and M.J. Orlova-Bienkowskaja
Scymnus subvillosus (Goeze, 1777)	Sochi	Adler, Olympic village, bank of the pond, sweep netting, 4.5.2018	43.4177	39.9462	2018	A.O. Bieńkowski1 and M.J. Orlova-Bienkowskaja
Scymnus subvillosus (Goeze, 1777)	Sochi	Adler, Imeretinsky resort railway station, wasteland along the chanel, sweep netting, 6.5.2018	43.4119	39.9743	2018	A.O. Bieńkowski1 and M.J. Orlova-Bienkowskaja
Scymnus subvillosus (Goeze, 1777)	Sochi	Adler, Imeretinsky resort railway station, wasteland, sweep netting, 6.5.2018	43.4119	39.9743	2018	A.O. Bieńkowski1 and M.J. Orlova-Bienkowskaja
Scymnus subvillosus (Goeze, 1777)	Sochi	Adler, Veseloe, tangerine garden, 43.409272 N, 39.984822 E, shaking of branches of tangerine trees, 14.5.2018	43.4096	39.9842	2018	A.O. Bieńkowski1 and M.J. Orlova-Bienkowskaja
Scymnus subvillosus (Goeze, 1777)	Sochi	Adler, Moldovka,Pchelovodov street, sweep netting and shaking of bushes, 16.9.2020	43.455	39.95	2020	A.O. Bieńkowski1 and M.J. Orlova-Bienkowskaja
Scymnus subvillosus (Goeze, 1777)	Sochi	Adler, Moldovka,Pchelovodov street, sweep netting and shaking of bushes at night, 16-17.9.2020	43.455	39.95	2020	A.O. Bieńkowski1 and M.J. Orlova-Bienkowskaja
Scymnus subvillosus (Goeze, 1777)	Sochi	Adler, wasteland near the reilway station "Olimpic Park", 25.9.2020	43.4132	39.9695	2020	A.O. Bieńkowski1 and M.J. Orlova-Bienkowskaja
Scymnus suturalis Thunberg, 1795	Anapa	Anapa, Dzhemete, meadow, sweep netting, 16.8.1990	44.9513	37.3237	1990	A.O. Bieńkowski1 and M.J. Orlova-Bienkowskaja
Scymnus suturalis Thunberg, 1795	Sochi	Adler, Mzymta river floodplain, sweep netting of bishes and grasses, 11.5.2013	43.4184	39.9243	2013	A.O. Bieńkowski1 and M.J. Orlova-Bienkowskaja
Scymnus suturalis Thunberg, 1795	Sochi	Sochi, shaking of bushes at the daytime, 24.4.2018	43.5855	39.7231	2018	A.O. Bieńkowski1 and M.J. Orlova-Bienkowskaja
Serangium montazerii Fürsch, 1995	Sochi	Sochi, Tonnelnaya street, Parallelnaya street and near the railway station, shaking of bushes in the evening, 10.6.2017	43.5902	39.7292	2017	A.O. Bieńkowski1 and M.J. Orlova-Bienkowskaja
Serangium montazerii Fürsch, 1995	Sochi	Sochi, shaking of bushes in the evening, 29.4.2018	43.5855	39.7231	2018	A.O. Bieńkowski1 and M.J. Orlova-Bienkowskaja
Serangium montazerii Fürsch, 1995	Sochi	Sochi, shaking of bushes in the evening, 3.5.2018	43.5855	39.7231	2018	A.O. Bieńkowski1 and M.J. Orlova-Bienkowskaja
Serangium montazerii Fürsch, 1995	Sochi	Adler, Veseloe, tangerine garden, 43.409272 N, 39.984822 E, shaking of branches of tangerine trees, 14.5.2018	43.4096	39.9842	2018	A.O. Bieńkowski1 and M.J. Orlova-Bienkowskaja
Serangium montazerii Fürsch, 1995	Sochi	Адлер, Veseloe , tangerine garden, 43.409272 N, 39.984822 E, shaking of branches of tangerine trees, 24.9.2020	43.4096	39.9842	2020	A.O. Bieńkowski1 and M.J. Orlova-Bienkowskaja
Sospita vigintiguttata (Linnaeus, 1758)	Sochi	Caucasus occ., Krasnaja Polana, 2.6.1907, Kiritschenko	43.68	40.2055	1907	Zoological Institute, Russian Academy of Sciences
Stethorus pusillus (Herbst, 1797)	Novorossijsk	Tonnelnaya 7.1910	44.8373	37.6544	1910	[Bogdanov-Katjkov, 1916]
Stethorus pusillus (Herbst, 1797)	Sochi	Lazarevskaya, Krasnodar region, 2.10.1985, A.G. Kirejchuk	43.9084	39.3334	1985	Zoological Institute, Russian Academy of Sciences
Stethorus pusillus (Herbst, 1797)	Sochi	Sochi, sweep netting of grasses, 31.5.2008	43.5855	39.7231	2008	A.O. Bieńkowski1 and M.J. Orlova-Bienkowskaja
Stethorus pusillus (Herbst, 1797)	Sochi	Sochi, the hill near Fabritsiusa Street, sweep netting of grasses, 1.6.2008	43.5795	39.7492	2008	A.O. Bieńkowski1 and M.J. Orlova-Bienkowskaja
Stethorus pusillus (Herbst, 1797)	Sochi	Razdolnoe, sweep netting of grasses at the forest edge, 19.5.2008	43.5834	39.7716	2008	A.O. Bieńkowski1 and M.J. Orlova-Bienkowskaja
Stethorus pusillus (Herbst, 1797)	Sochi	Piket Mountain, 500 m, sweep netting of grasses abd bushes, 20.5.2008	43.6433	39.7883	2008	A.O. Bieńkowski1 and M.J. Orlova-Bienkowskaja
Stethorus pusillus (Herbst, 1797)	Tuapsinskiy district	Tuapse, deciduous forest on the hill, 7.5.2013	44.0956	39.0736	2013	A.O. Bieńkowski1 and M.J. Orlova-Bienkowskaja
Stethorus pusillus (Herbst, 1797)	Sochi	Psou, wasteland, sweep netting, 2.5.2013	43.3951	40.0082	2013	A.O. Bieńkowski1 and M.J. Orlova-Bienkowskaja
Stethorus pusillus (Herbst, 1797)	Sochi	Gornyj Vozdukh railway station, sweep netting of grasses and bushes, 20.5.2016	43.6801	39.6	2016	A.O. Bieńkowski1 and M.J. Orlova-Bienkowskaja
Stethorus pusillus (Herbst, 1797)	Sochi	Adler, bank of Psou River, sweep netting, 22.5.2016	43.3951	40.0082	2016	A.O. Bieńkowski1 and M.J. Orlova-Bienkowskaja
Stethorus pusillus (Herbst, 1797)	Sochi	Sochi, shaking of bushes in the evening, 13.6.2017	43.5855	39.7231	2017	A.O. Bieńkowski1 and M.J. Orlova-Bienkowskaja
Stethorus pusillus (Herbst, 1797)	Sochi	Sochi,The Twentieth Mountain Rifle Division Street, forest edge, sweep netting, 14.6.2017	43.5714	39.7573	2017	A.O. Bieńkowski1 and M.J. Orlova-Bienkowskaja
Stethorus pusillus (Herbst, 1797)	Sochi	Matsesta, sea shore, meadow, sweep netting, 12.6.2017	43.5444	39.7896	2017	A.O. Bieńkowski1 and M.J. Orlova-Bienkowskaja
Stethorus pusillus (Herbst, 1797)	Sochi	Adler, Imeretinsky resort railway station, on thuja, shaking of bushes, 8.6.2017	43.4119	39.9743	2017	A.O. Bieńkowski1 and M.J. Orlova-Bienkowskaja
Stethorus pusillus (Herbst, 1797)	Sochi	Golovinka, the floodplain of Shakhe river, sweep netting of grasses and bushes, 12.5.2018	43.7938	39.4688	2018	A.O. Bieńkowski1 and M.J. Orlova-Bienkowskaja
Stethorus pusillus (Herbst, 1797)	Sochi	Sochi, shaking of bushes in the evening, 10.5.2018	43.5855	39.7231	2018	A.O. Bieńkowski1 and M.J. Orlova-Bienkowskaja
Stethorus pusillus (Herbst, 1797)	Sochi	Sochi, shaking of bushes in the evening, 21.4.2018	43.5855	39.7231	2018	A.O. Bieńkowski1 and M.J. Orlova-Bienkowskaja
Stethorus pusillus (Herbst, 1797)	Sochi	Sochi, shaking of bushes in the evening, 24.4.2018	43.5855	39.7231	2018	A.O. Bieńkowski1 and M.J. Orlova-Bienkowskaja
Stethorus pusillus (Herbst, 1797)	Sochi	Sochi, shaking of bushes in the evening, 9.5.2018	43.5855	39.7231	2018	A.O. Bieńkowski1 and M.J. Orlova-Bienkowskaja
Stethorus pusillus (Herbst, 1797)	Sochi	Sochi, shaking of bushes, 24.4.2018	43.5855	39.7231	2018	A.O. Bieńkowski1 and M.J. Orlova-Bienkowskaja
Stethorus pusillus (Herbst, 1797)	Sochi	Sochi, Seafront, shaking of bushes in the evening, 1.5.2018	43.5736	39.7269	2018	A.O. Bieńkowski1 and M.J. Orlova-Bienkowskaja
Stethorus pusillus (Herbst, 1797)	Sochi	Razbityj Kotel, forest and meadows on the hill, sweep netting, 30.4.2018	43.6854	39.7287	2018	A.O. Bieńkowski1 and M.J. Orlova-Bienkowskaja
Stethorus pusillus (Herbst, 1797)	Sochi	Sochi, Podgornaya street, shaking of bushes: Rosa, Spirea, Hybiskus, 27.4.2018	43.6187	39.7322	2018	A.O. Bieńkowski1 and M.J. Orlova-Bienkowskaja
Stethorus pusillus (Herbst, 1797)	Sochi	Bolsjoj Akhun mountain, deciduous forest on the ridge, sweep netting, 25.4.2018	43.5505	39.8432	2018	A.O. Bieńkowski1 and M.J. Orlova-Bienkowskaja
Stethorus pusillus (Herbst, 1797)	Sochi	Adler, near Olympic Village railway station, waste land, sweep netting, 4.5.2018	43.4177	39.9462	2018	A.O. Bieńkowski1 and M.J. Orlova-Bienkowskaja
Stethorus pusillus (Herbst, 1797)	Sochi	Adler, Imeretinskij Resort, bank of the pond, sweep netting, 4.5.2018	43.4119	39.9743	2018	A.O. Bieńkowski1 and M.J. Orlova-Bienkowskaja
Stethorus pusillus (Herbst, 1797)	Sochi	Adler, Veseloe, tangerine garden, 43.409272 N, 39.984822 E, shaking of branches of tangerine trees, 14.5.2018	43.4096	39.9842	2018	A.O. Bieńkowski1 and M.J. Orlova-Bienkowskaja
Stethorus pusillus (Herbst, 1797)	Sochi	Adler, Moldovka, floodplain of Mzymta river у пешеходного моста, sweep netting and shaking of bushes, 17.9.2020	43.4649	39.9752	2020	A.O. Bieńkowski1 and M.J. Orlova-Bienkowskaja
Stethorus pusillus (Herbst, 1797)	Sochi	Adler, Moldovka, floodplain of Mzymta river, sweep netting and shaking of bushes, 18.9.2020	43.4649	39.9752	2020	A.O. Bieńkowski1 and M.J. Orlova-Bienkowskaja
Stethorus pusillus (Herbst, 1797)	Sochi	Adler, deciduous forest по дороге близ СТ Высокое, sweep netting and shaking of bushes, 20.9.2020	43.4976	39.9768	2020	A.O. Bieńkowski1 and M.J. Orlova-Bienkowskaja
Stethorus pusillus (Herbst, 1797)	Sochi	Adler, Веселое, tangerine garden, shaking of bushes, 24.9.2020	43.4096	39.9842	2020	A.O. Bieńkowski1 and M.J. Orlova-Bienkowskaja
Stethorus pusillus (Herbst, 1797)	Sochi	Adler, близ Ахштырской пещеры, deciduous forest, shaking of bushes, 22.9.2020	43.5203	39.9954	2020	A.O. Bieńkowski1 and M.J. Orlova-Bienkowskaja
Subcoccinella vigintiquatuorpunctata (Linnaeus, 1758)	Sochi	Caucasus occ., Krasnaja Polana, V-1907, Kiritschenko	43.68	40.2055	1907	Zoological Institute, Russian Academy of Sciences
Subcoccinella vigintiquatuorpunctata (Linnaeus, 1758)	Novorossijsk	Novorossijsk, Anapskoe Roadway, 7.1910	44.7343	37.7459	1910	[Bogdanov-Katjkov, 1916]
Subcoccinella vigintiquatuorpunctata (Linnaeus, 1758)	Novorossijsk	Abrau, the meadow, 19.5.1995	44.7003	37.5973	1995	A.O. Bieńkowski1 and M.J. Orlova-Bienkowskaja
Subcoccinella vigintiquatuorpunctata (Linnaeus, 1758)	Novorossijsk	Abrau, on the road, 14.5.1995	44.7003	37.5973	1995	A.O. Bieńkowski1 and M.J. Orlova-Bienkowskaja
Subcoccinella vigintiquatuorpunctata (Linnaeus, 1758)	Sochi	Sochi, 31.3.1996 Smirnov	43.5855	39.7231	1996	M.E. Smirnov
Subcoccinella vigintiquatuorpunctata (Linnaeus, 1758)	Sochi	Razdolnoe, sweep netting, 18.5.2008	43.5834	39.7716	2008	A.O. Bieńkowski1 and M.J. Orlova-Bienkowskaja
Subcoccinella vigintiquatuorpunctata (Linnaeus, 1758)	Sochi	Razdolnoe, sweep netting, 24.5.2008	43.5834	39.7716	2008	A.O. Bieńkowski1 and M.J. Orlova-Bienkowskaja
Subcoccinella vigintiquatuorpunctata (Linnaeus, 1758)	Tuapsinskiy district	Tuapse district, 09.07.2009 M. Gulyaev	44.0956	39.0736	2009	https://www.zin.ru/animalia/coleoptera/rus/subvigmg.htm
Subcoccinella vigintiquatuorpunctata (Linnaeus, 1758)	Sochi	Abazinka, sweep netting, 6.5.2013	43.6089	39.8256	2013	A.O. Bieńkowski1 and M.J. Orlova-Bienkowskaja
Subcoccinella vigintiquatuorpunctata (Linnaeus, 1758)	Sochi	Semenovka, 4.5.2013	43.6419	39.8502	2013	A.O. Bieńkowski1 and M.J. Orlova-Bienkowskaja
Subcoccinella vigintiquatuorpunctata (Linnaeus, 1758)	Sochi	Plastunka, road side, sweep netting, 5.6.2017	43.6825	39.761	2017	A.O. Bieńkowski1 and M.J. Orlova-Bienkowskaja
Subcoccinella vigintiquatuorpunctata (Linnaeus, 1758)	Sochi	Adler, Imeretinskij Resort, waste land, sweep netting at night, 15.6.2017	43.4119	39.9743	2017	A.O. Bieńkowski1 and M.J. Orlova-Bienkowskaja
Subcoccinella vigintiquatuorpunctata (Linnaeus, 1758)	Sochi	Adler, Imeretinskaya lowland, wasteland, sweep netting, 11.6.2017	43.41	39.9787	2017	A.O. Bieńkowski1 and M.J. Orlova-Bienkowskaja
Subcoccinella vigintiquatuorpunctata (Linnaeus, 1758)	Sochi	Adler, Imeretinskaya lowland, wasteland, sweep netting, 16.6.2017	43.41	39.9787	2017	A.O. Bieńkowski1 and M.J. Orlova-Bienkowskaja
Subcoccinella vigintiquatuorpunctata (Linnaeus, 1758)	Sochi	Sochi, Plastunskaya Street, wasteland, sweep netting, 10.5.2018	43.6188	39.7415	2018	A.O. Bieńkowski1 and M.J. Orlova-Bienkowskaja
Subcoccinella vigintiquatuorpunctata (Linnaeus, 1758)	Sochi	Plastunka, forest edge on the mountain slope, sweep netting, 9.5.2018	43.6825	39.761	2018	A.O. Bieńkowski1 and M.J. Orlova-Bienkowskaja
Subcoccinella vigintiquatuorpunctata (Linnaeus, 1758)	Sochi	Plastunka, near the pond, sweep netting, 9.5.2018	43.6825	39.761	2018	A.O. Bieńkowski1 and M.J. Orlova-Bienkowskaja
Subcoccinella vigintiquatuorpunctata (Linnaeus, 1758)	Sochi	Piket Mountain, deciduous forest, sweep netting of bushes, 11.5.2018	43.6433	39.7883	2018	A.O. Bieńkowski1 and M.J. Orlova-Bienkowskaja
Subcoccinella vigintiquatuorpunctata (Linnaeus, 1758)	Sochi	Adler, Olympic Park, wasteland, 6.5.2018	43.4062	39.9546	2018	A.O. Bieńkowski1 and M.J. Orlova-Bienkowskaja
Subcoccinella vigintiquatuorpunctata (Linnaeus, 1758)	Sochi	Adler, Moldovka, холм, shaking of bushes, 19.9.2020	43.4579	39.9441	2020	A.O. Bieńkowski1 and M.J. Orlova-Bienkowskaja
Tytthaspis sedecimpunctata (Linnaeus, 1761)	Anapa	Anapa, meadow on the cliff at the sea, 18.8.1990 and 17.8.1990	44.895	37.3162	1990	A.O. Bieńkowski1 and M.J. Orlova-Bienkowskaja
Tytthaspis sedecimpunctata (Linnaeus, 1761)	Anapa	Anapa, Dzhemete, meadow, sweep netting, 13.8.1990	44.9513	37.3237	1990	A.O. Bieńkowski1 and M.J. Orlova-Bienkowskaja
Tytthaspis sedecimpunctata (Linnaeus, 1761)	Anapa	Vicinity of Anapa, Sukko, the meadow, sweep netting, 21.8.1990	44.7913	37.4023	1990	A.O. Bieńkowski1 and M.J. Orlova-Bienkowskaja
Tytthaspis sedecimpunctata (Linnaeus, 1761)	Novorossijsk	Abrau, the meadow near the pond, 19.5.1995 and 14.5.1995	44.7003	37.5973	1995	A.O. Bieńkowski1 and M.J. Orlova-Bienkowskaja
Tytthaspis sedecimpunctata (Linnaeus, 1761)	Anapa	Malyj Utrish, Sukhoj Liman, 23.6.2000, K.B. Gongalsky	44.7609	37.3864	2000	K.B. Gongalsky
Tytthaspis sedecimpunctata (Linnaeus, 1761)	Anapa	Vicinity of Malyj Utrish, Topolevaya Shchel, 9.6.2000, K.B. Gongalsky	44.7094	37.4572	2000	K.B. Gongalsky
Tytthaspis sedecimpunctata (Linnaeus, 1761)	Anapa	vicinity of Bolshoj Utrish, Sukhoj Liman, 10-30.8.2012, A.A. Dergalev	44.7609	37.3864	2012	All-Russian center for plant quarantine
Tytthaspis sedecimpunctata (Linnaeus, 1761)	Anapa	Vicinity of Malyj Utrish, Sukhoj Liman, sweep netting, 7.5.2016	44.7549	37.4562	2016	A.O. Bieńkowski1 and M.J. Orlova-Bienkowskaja
Tytthaspis sedecimpunctata (Linnaeus, 1761)	Sochi	Adler, Imeretinskij Resort, bank of the pond, sweep netting, 3.6.2017	43.4119	39.9743	2017	A.O. Bieńkowski1 and M.J. Orlova-Bienkowskaja
Tytthaspis sedecimpunctata (Linnaeus, 1761)	Sochi	Adler, Imeretinskaya lowland, wasteland, pitfall traps, 15-18.6.2017	43.41	39.9787	2017	A.O. Bieńkowski1 and M.J. Orlova-Bienkowskaja
Tytthaspis sedecimpunctata (Linnaeus, 1761)	Anapa	Sukko, 16.7.2018	44.7913	37.4023	2018	E.A. Khachikov
Tytthaspis sedecimpunctata (Linnaeus, 1761)	Anapa	Sukko, 27-30.3.2018	44.7913	37.4023	2018	E.A. Khachikov
Tytthaspis sedecimpunctata (Linnaeus, 1761)	Sochi	Sochi, Sochi river floodplain, sweep netting, 27.4.2018	43.5959	39.7226	2018	A.O. Bieńkowski1 and M.J. Orlova-Bienkowskaja
Tytthaspis sedecimpunctata (Linnaeus, 1761)	Sochi	Adler, near the pond in the Olympic village, 4.5.2018	43.4127	39.9378	2018	A.O. Bieńkowski1 and M.J. Orlova-Bienkowskaja
Tytthaspis sedecimpunctata (Linnaeus, 1761)	Sochi	Adler, near Imeretinskij Resort railway station, waste land near the chanel, sweep netting, 4.5.2018	43.4119	39.9743	2018	A.O. Bieńkowski1 and M.J. Orlova-Bienkowskaja
Tytthaspis sedecimpunctata (Linnaeus, 1761)	Sochi	Adler, wasteland near the reilway station "Olimpic Park", 25.9.2020	43.4132	39.9695	2020	A.O. Bieńkowski1 and M.J. Orlova-Bienkowskaja
Tytthaspis sedecimpunctata (Linnaeus, 1761)	Sochi	Adler, Moldovka, floodplain of Mzymta river у пешеходного моста, sweep netting and shaking of bushes, 17.9.2020	43.4649	39.9752	2020	A.O. Bieńkowski1 and M.J. Orlova-Bienkowskaja
Vibidia duodecimguttata (Poda, 1761)	Sochi	Sochi, 28.7.1893, Luchnik leg,	43.5855	39.7231	1893	Zoological Institute, Russian Academy of Sciences
Vibidia duodecimguttata (Poda, 1761)	Anapa	Anapa, at flight, 15.7.1903	44.895	37.3162	1903	Zoological Institute, Russian Academy of Sciences
Vibidia duodecimguttata (Poda, 1761)	Novorossijsk	Novorossijsk, Anapskoe Roadway, 6.1912	44.7343	37.7459	1912	[Bogdanov-Katjkov, 1916]
Vibidia duodecimguttata (Poda, 1761)	Gelendzhik	Gelendzhik, N. Vorob'ev	44.5611	38.0768	1912	Zoological Institute, Russian Academy of Sciences
Vibidia duodecimguttata (Poda, 1761)	Sochi	25 km north-east to Sochi, 3.6.1964, Kurnoskov	43.7577	39.5108	1964	Zoological Institute, Russian Academy of Sciences
Vibidia duodecimguttata (Poda, 1761)	Sochi	Lazarevskaya, 2.10.1985, A.G. Kirejchuk	43.9084	39.3334	1985	Zoological Institute, Russian Academy of Sciences
Vibidia duodecimguttata (Poda, 1761)	Gelendzhik	Gelendzhik, Cape Tonkij, 28.8.1990	44.5622	38.0255	1990	A.O. Bieńkowski1 and M.J. Orlova-Bienkowskaja
Vibidia duodecimguttata (Poda, 1761)	Gelendzhik	Gelendzhik district, Dzhankhot, the foothill, the meadow, sweep netting, 4.9.1990	44.4677	38.1569	1990	A.O. Bieńkowski1 and M.J. Orlova-Bienkowskaja
Vibidia duodecimguttata (Poda, 1761)	Tuapsinskiy district	14 km south-east to Tuapse, Vishnevka, 10.9.1994, K. Tomkovitch	44.2386	38.9031	1994	All-Russian center for plant quarantine
Vibidia duodecimguttata (Poda, 1761)	Anapa	Vicinity of Malyj Utrish, Shirokaya, shaking of bushes, 16.5.1995	44.7227	37.4525	1995	A.O. Bieńkowski1 and M.J. Orlova-Bienkowskaja
Vibidia duodecimguttata (Poda, 1761)	Anapa	Vicinity of Malyj Utrish, beech forest, measow nesr the road, sweep netting of grasses, 9.5.1995	44.7094	37.4572	1995	A.O. Bieńkowski1 and M.J. Orlova-Bienkowskaja
Vibidia duodecimguttata (Poda, 1761)	Anapa	Vicinity of Malyj Utrish, deciduous forest, on grasses, 10.5.1995	44.7094	37.4572	1995	A.O. Bieńkowski1 and M.J. Orlova-Bienkowskaja
Vibidia duodecimguttata (Poda, 1761)	Sochi	Sochi, Khosta 07.1996 Brunova	43.5128	39.8737	1996	M.E. Smirnov
Vibidia duodecimguttata (Poda, 1761)	Anapa	Vicinity of Malyj Utrish, Topolevaya Shchel, 9.6.2000, K.B. Gongalsky	44.7094	37.4572	2000	K.B. Gongalsky
Vibidia duodecimguttata (Poda, 1761)	Anapa	Vicinity of Malyj Utrish, Lobanova Shchel, 20.6.2000,K.B. Gongalsky	44.7095	37.4755	2000	K.B. Gongalsky
Vibidia duodecimguttata (Poda, 1761)	Gelendzhik	Gelendzhik district, between Krinitsy and Praskoveevka, Temnaya Shchel, stream mouth, on the bush of brambleberry, 28.6.2004, K. Tomkovitch	44.4145	38.2529	2004	All-Russian center for plant quarantine
Vibidia duodecimguttata (Poda, 1761)	Sochi	Sochi, 26.5.2008	43.5855	39.7231	2008	A.O. Bieńkowski1 and M.J. Orlova-Bienkowskaja
Vibidia duodecimguttata (Poda, 1761)	Novorossijsk	Novorossiysk env. Andreevsky Pass 500m 44°43’N, 37°51’E M. Danilevsky 4.6.2010	44.7167	37.85	2010	M.L. Danilevsky
Vibidia duodecimguttata (Poda, 1761)	Anapa	vicinity of Bolshoj Utrish, 15-30.8.2013, A.A. Dergalev	44.7609	37.3864	2013	All-Russian center for plant quarantine
Vibidia duodecimguttata (Poda, 1761)	Sochi	Sochi, the hill near Fabritsiusa Street, edge of deciduous forest, sweep netting, 30.4.2013	43.5795	39.7492	2013	A.O. Bieńkowski1 and M.J. Orlova-Bienkowskaja
Vibidia duodecimguttata (Poda, 1761)	Sochi	Sochi,The twentieth mountain rifle division street, 30.4.2013	43.5714	39.7573	2013	A.O. Bieńkowski1 and M.J. Orlova-Bienkowskaja
Vibidia duodecimguttata (Poda, 1761)	Sochi	Abazinka, 6.5.2013	43.6089	39.8256	2013	A.O. Bieńkowski1 and M.J. Orlova-Bienkowskaja
Vibidia duodecimguttata (Poda, 1761)	Anapa	Vicinity of Malyj Utrish, biological station, 26.5-5.6.2014 A.S. Prosvirov	44.7094	37.4572	2014	A.S. Prosvirov
Vibidia duodecimguttata (Poda, 1761)	Gelendzhik	Gelendzhik district, Dzhankhot Ridge, 80-150 m a.s.l., 44˚28’03.9”N 38˚09’25.5”E 31.5-4.6.2016, A.S. Prosvirov	44.4677	38.1569	2016	A.S. Prosvirov
Vibidia duodecimguttata (Poda, 1761)	Novorossijsk	The bank of Abrau Lake, deciduous forest, shaking of bushes, 8.5.2016	44.7003	37.5973	2016	A.O. Bieńkowski1 and M.J. Orlova-Bienkowskaja
Vibidia duodecimguttata (Poda, 1761)	Sochi	Sochi, forest edge, sweep netting, 18.5.2016	43.5855	39.7231	2016	A.O. Bieńkowski1 and M.J. Orlova-Bienkowskaja
Vibidia duodecimguttata (Poda, 1761)	Sochi	Sochi, Riviera, the beach, 13.6.2017	43.5932	39.7158	2017	A.O. Bieńkowski1 and M.J. Orlova-Bienkowskaja
Vibidia duodecimguttata (Poda, 1761)	Sochi	Sochi, shaking of bushes in the evening, 10.6.2017	43.5855	39.7231	2017	A.O. Bieńkowski1 and M.J. Orlova-Bienkowskaja
Vibidia duodecimguttata (Poda, 1761)	Sochi	Sochi, shaking of bushes in the evening, 13.6.2017	43.5855	39.7231	2017	A.O. Bieńkowski1 and M.J. Orlova-Bienkowskaja
Vibidia duodecimguttata (Poda, 1761)	Sochi	Sochi, shaking of bushes in the evening, 8.6.2017	43.5855	39.7231	2017	A.O. Bieńkowski1 and M.J. Orlova-Bienkowskaja
Vibidia duodecimguttata (Poda, 1761)	Sochi	Sochi, shaking of bushes in the evening, 9.6.2017	43.5855	39.7231	2017	A.O. Bieńkowski1 and M.J. Orlova-Bienkowskaja
Vibidia duodecimguttata (Poda, 1761)	Sochi	Sochi,The twentieth mountain rifle division street, edge of the forest, sweep netting and shaking of bushes, 14.6.2017	43.5714	39.7573	2017	A.O. Bieńkowski1 and M.J. Orlova-Bienkowskaja
Vibidia duodecimguttata (Poda, 1761)	Sochi	Adler, "Southern cultures" Park, sweep netting, 17.6.2017	43.4187	39.9383	2017	A.O. Bieńkowski1 and M.J. Orlova-Bienkowskaja
Vibidia duodecimguttata (Poda, 1761)	Sochi	Sochi, Mamajsjij Forestpark, 21.4.2018	43.6274	39.7088	2018	A.O. Bieńkowski1 and M.J. Orlova-Bienkowskaja
Vibidia duodecimguttata (Poda, 1761)	Sochi	Sochi, shaking of bushes in the evening, 10.5.2018	43.5855	39.7231	2018	A.O. Bieńkowski1 and M.J. Orlova-Bienkowskaja
Vibidia duodecimguttata (Poda, 1761)	Sochi	Sochi, shaking of bushes in the evening, 21.4.2018	43.5855	39.7231	2018	A.O. Bieńkowski1 and M.J. Orlova-Bienkowskaja
Vibidia duodecimguttata (Poda, 1761)	Sochi	Sochi, shaking of bushes in the evening, 24.4.2018	43.5855	39.7231	2018	A.O. Bieńkowski1 and M.J. Orlova-Bienkowskaja
Vibidia duodecimguttata (Poda, 1761)	Sochi	Sochi, shaking of bushes in the evening, 29.4.2018	43.5855	39.7231	2018	A.O. Bieńkowski1 and M.J. Orlova-Bienkowskaja
Vibidia duodecimguttata (Poda, 1761)	Sochi	Sochi, shaking of bushes, 24.4.2018	43.5855	39.7231	2018	A.O. Bieńkowski1 and M.J. Orlova-Bienkowskaja
Vibidia duodecimguttata (Poda, 1761)	Sochi	Matsesta, Agur River floodplain, sweep netting, 28.4.2018	43.5444	39.7896	2018	A.O. Bieńkowski1 and M.J. Orlova-Bienkowskaja
Vibidia duodecimguttata (Poda, 1761)	Sochi	Adler, near Olympic Village railway station, waste land, sweep netting, 4.5.2018	43.4177	39.9462	2018	A.O. Bieńkowski1 and M.J. Orlova-Bienkowskaja
Vibidia duodecimguttata (Poda, 1761)	Anapa	Bolshoj Utrish, 4.6.2019	44.7609	37.3864	2019	E.A. Khachikov
Vibidia duodecimguttata (Poda, 1761)	Sochi	Adler, Moldovka, холм, shaking of bushes, 19.9.2020	43.4579	39.9441	2020	A.O. Bieńkowski1 and M.J. Orlova-Bienkowskaja
Vibidia duodecimguttata (Poda, 1761)	Sochi	Adler, Moldovka, shaking of bushes at night at the airport fence, 21.9.2020	43.4531	39.9559	2020	A.O. Bieńkowski1 and M.J. Orlova-Bienkowskaja
Vibidia duodecimguttata (Poda, 1761)	Sochi	Adler, Moldovka, floodplain of Mzymta river, sweep netting and shaking of bushes, 18.9.2020	43.4649	39.9752	2020	A.O. Bieńkowski1 and M.J. Orlova-Bienkowskaja
Vibidia duodecimguttata (Poda, 1761)	Sochi	Adler, Moldovka, floodplain of Mzymta river у пешеходного моста, sweep netting and shaking of bushes, 17.9.2020	43.4649	39.9752	2020	A.O. Bieńkowski1 and M.J. Orlova-Bienkowskaja
Vibidia duodecimguttata (Poda, 1761)	Sochi	Adler, СТ Высокое, сорняки и сад, sweep netting, 20.9.2020	43.4976	39.9768	2020	A.O. Bieńkowski1 and M.J. Orlova-Bienkowskaja
Vibidia duodecimguttata (Poda, 1761)	Sochi	Adler, deciduous forest по дороге близ СТ Высокое, sweep netting and shaking of bushes, 20.9.2020	43.4976	39.9768	2020	A.O. Bieńkowski1 and M.J. Orlova-Bienkowskaja
